# Supplementary material for: Assessing Species Boundaries Using Multilocus Species Delimitation in a Morphologically Conserved Group of Neotropical Freshwater Fishes, the Poecilia sphenops Species Complex (Poeciliidae)
Source: PLoS One. 2015 Apr 7;10(4):e0121139. doi: 10.1371/journal.pone.0121139 (PMC4388586; doi:10.1371/journal.pone.0121139)
Supplement: S1 Data — (XLSX) [file pone.0121139.s002.xlsx]

## Sheet: Samples & MtDNA GenBank nos.
Cytb Ingroup Sample																	Mitochondrial gene GenBank numbers
No.	Species_ID	Ingroup / Outgroup	ID	Voucher No. / Reference	Locality	Drainage 1	Drainage 2	Slope	Country	Country code	Latitude	Longitude	Taxon / lineage	CLADE	bGMYC groups	bGMYC-based taxonomy	Cytb	Reference	cox1	Reference
	Poecilia orri	Ingroup	08.2060	LSU backlog/WAM08-109	Island of Roatan, Bay Islands, off northern coast of Honduras	Atlantic	Atlantic	Atlantic	Honduras	Hon	N/A	N/A	P. mexicana	Clade 8c	8	P. mexicana	N/A	N/A	KP700414	This study
	Poecilia orri	Ingroup	08.2061	LSU backlog/WAM08-109	Island of Roatan, Bay Islands, off northern coast of Honduras	Atlantic	Atlantic	Atlantic	Honduras	Hon	N/A	N/A	P. mexicana	Clade 8c	8	P. mexicana	N/A	N/A	KP700415	This study
	Poecilia orri	Ingroup	08.2066	LSU backlog/WAM08-109	Island of Roatan, Bay Islands, off northern coast of Honduras	Atlantic	Atlantic	Atlantic	Honduras	Hon	N/A	N/A	P. mexicana	Clade 8c	8	P. mexicana	N/A	N/A	KP700416	This study
1	Poecilia gillii	Ingroup	173961	MLBM 173961	Unnamed trib. to Río Ojucuapa at San Roque (Comarca Santa Marta) off unnamed road, ~2 km SW of Hwy 25	Lago Nicaragua	Río San Juan	Atlantic	Nicaragua	N	11.8294	-85.2048	P. sp. "Tipitapa"	Clade 1	1	P. sp. "Tipitapa"	KP700376	This study	KP700491	This study
2	Poecilia gillii	Ingroup	173966	MLBM 173966	Unnamed trib. to Río Ojucuapa at San Roque (Comarca Santa Marta) off unnamed road, ~2 km SW of Hwy 25	Lago Nicaragua	Río San Juan	Atlantic	Nicaragua	N	11.8294	-85.2048	P. sp. "Tipitapa"	Clade 1	1	P. sp. "Tipitapa"	KP700379	This study	N/A	N/A
3	Poecilia gillii	Ingroup	172696	MLBM 172696	Río Tipitapa	Lago Nicaragua	Río San Juan	Atlantic	Nicaragua	N	12.2027	-86.1021	P. sp. "Tipitapa"	Clade 1	1	P. sp. "Tipitapa"	KP700330	This study	N/A	N/A
4	Poecilia gillii	Ingroup	173963	MLBM 173963	Unnamed trib. to Río Ojucuapa at San Roque (Comarca Santa Marta) off unnamed road, ~2 km SW of Hwy 25	Lago Nicaragua	Río San Juan	Atlantic	Nicaragua	N	11.8294	-85.2048	P. sp. "Tipitapa"	Clade 1	1	P. sp. "Tipitapa"	KP700377	This study	KP700492	This study
5	Poecilia gillii	Ingroup	172698	MLBM 172698	Río Tipitapa	Lago Nicaragua	Río San Juan	Atlantic	Nicaragua	N	12.2027	-86.1021	P. sp. "Tipitapa"	Clade 1	1	P. sp. "Tipitapa"	KP700331	This study	N/A	N/A
6	Poecilia gillii	Ingroup	172700	MLBM 172700	Río Tipitapa	Lago Nicaragua	Río San Juan	Atlantic	Nicaragua	N	12.2027	-86.1021	P. sp. "Tipitapa"	Clade 1	1	P. sp. "Tipitapa"	KP700333	This study	N/A	N/A
7	Poecilia gillii	Ingroup	172701	MLBM 172701	Río Tipitapa	Lago Nicaragua	Río San Juan	Atlantic	Nicaragua	N	12.2027	-86.1021	P. sp. "Tipitapa"	Clade 1	1	P. sp. "Tipitapa"	KP700334	This study	N/A	N/A
8	Poecilia gillii	Ingroup	172702	MLBM 172702	Río Tipitapa	Lago Nicaragua	Río San Juan	Atlantic	Nicaragua	N	12.2027	-86.1021	P. sp. "Tipitapa"	Clade 1	1	P. sp. "Tipitapa"	KP700335	This study	KP700477	This study
9	Poecilia gillii	Ingroup	172695	MLBM 172695	Río Tipitapa	Lago Nicaragua	Río San Juan	Atlantic	Nicaragua	N	12.2027	-86.1021	P. sp. "Tipitapa"	Clade 1	1	P. sp. "Tipitapa"	KP700329	This study	KP700476	This study
10	Poecilia gillii	Ingroup	172699	MLBM 172699	Río Tipitapa	Lago Nicaragua	Río San Juan	Atlantic	Nicaragua	N	12.2027	-86.1021	P. sp. "Tipitapa"	Clade 1	1	P. sp. "Tipitapa"	KP700332	This study	N/A	N/A
11	Poecilia catemaconis	Ingroup	Pcat_0	Palacios et al. (2013)	Lake Catemaco	Río Grande de Catemaco	Río Grande de Catemaco	Atlantic	Mexico	Mex	18.3833	-95.1228	P. catemaconis	Clade 2 - 2a Catemaco	2a	P. catemaconis (catemaconis + "sphenops" sp. 1)	KF276610	Palacios et al. (2013)	N/A	N/A
12	Poecilia catemaconis	Ingroup	Pcat3	Tobler et al. (2011)	Lake Catemaco	Río Grande de Catemaco	Río Grande de Catemaco	Atlantic	Mexico	Mex	18.3833	-95.1228	P. catemaconis	Clade 2 - 2a Catemaco	2a	P. catemaconis (catemaconis + "sphenops" sp. 1)	HQ677866	Tobler et al. (2011)	N/A	N/A
13	Poecilia "sphenops" sp. in Alda et al. (2013)	Ingroup	7780	STRI-NFC 7780	Río Sinacapa, 9 km from Guanagasapa	Río Maria Linda	Río Maria Linda	Pacific	Guatemala	Guat	14.2019	-90.7076	P. "sphenops" sp. In Alda et al	Clade 2 - 2a Catemaco	2a	P. catemaconis (catemaconis + "sphenops" sp. 1)	KP699870	This study	N/A	N/A
14	Poecilia "sphenops" sp. in Alda et al. (2013)	Ingroup	7731	STRI-NFC 7731	Río Pachipa, San Antonio Suchitepeque	Río Nahualate	Río Nahualate	Pacific	Guatemala	Guat	14.5034	-91.4077	P. "sphenops" sp. In Alda et al	Clade 2 - 2a Catemaco	2a	P. catemaconis (catemaconis + "sphenops" sp. 1)	KP699869	This study	N/A	N/A
15	Poecilia sphenops	Ingroup	Psphe35	Tobler et al. (2011)	Río Coatzocoalcos, Arroyo Prieto	Coatzocoalcos	Río Coatzocoalcos	Atlantic	Mexico	Mex	N/A	N/A	P. sphenops	Clade 2 - 2a Catemaco	2a	P. catemaconis (catemaconis + "sphenops" sp. 1)	HQ677898	Tobler et al. (2011)	N/A	N/A
16	Poecilia sp.	Ingroup	Psp2S_0	Palacios et al. (2013)	Suchiapa, in Chiapas	Río Grijalva	Río Grijalva	Atlantic	Mexico	Mex	16.6108	-93.0845	P. sphenops	Clade 2 - 2a Catemaco	2a	P. catemaconis (catemaconis + "sphenops" sp. 1)	KF276612	Palacios et al. (2013)	N/A	N/A
17	Poecilia sphenops	Ingroup	Psphe36	Tobler et al. (2011)	Río La Venta, Río Ninguillo, Pomposa Castellano, Valle Morelos	Río Ninguillo	Río Ninguillo	Atlantic	Mexico	Mex	N/A	N/A	P. sphenops	Clade 2 - 2a Catemaco	2a	P. catemaconis (catemaconis + "sphenops" sp. 1)	HQ677899	Tobler et al. (2011)	N/A	N/A
18	Poecilia sp.	Ingroup	Psp1T-0	Palacios et al. (2013)	Tehuatlan, in Hidalgo	Río Panuco	Río Panuco	Atlantic	Mexico	Mex	21.0513	-98.507	P. sphenops	Clade 2 - 2a Catemaco	2a	P. catemaconis (catemaconis + "sphenops" sp. 1)	KF276611	Palacios et al. (2013)	N/A	N/A
19	Poecilia gillii	Ingroup	174511	MLBM 174511	Unnamed trib. to Río Tamarindo, ~5 km NW of El Tamarindo (around 20 km SE of León)	Río Tamarindo	Río Tamarindo	Pacific	Nicaragua	N	12.2811	-86.7511	P. sphenops	Clade 2 - 2b	2b	P. sphenops	KP700399	This study	KP700496	This study
20	Poecilia gillii	Ingroup	174512	MLBM 174512	Unnamed trib. to Río Tamarindo, ~5 km NW of El Tamarindo (around 20 km SE of León)	Río Tamarindo	Río Tamarindo	Pacific	Nicaragua	N	12.2811	-86.7511	P. sphenops	Clade 2 - 2b	2b	P. sphenops	KP700400	This study	N/A	N/A
21	Poecilia gillii	Ingroup	174513	MLBM 174513	Unnamed trib. to Río Tamarindo, ~5 km NW of El Tamarindo (around 20 km SE of León)	Río Tamarindo	Río Tamarindo	Pacific	Nicaragua	N	12.2811	-86.7511	P. sphenops	Clade 2 - 2b	2b	P. sphenops	KP700401	This study	N/A	N/A
22	Poecilia gillii	Ingroup	174514	MLBM 174514	Unnamed trib. to Río Tamarindo, ~5 km NW of El Tamarindo (around 20 km SE of León)	Río Tamarindo	Río Tamarindo	Pacific	Nicaragua	N	12.2811	-86.7511	P. sphenops	Clade 2 - 2b	2b	P. sphenops	KP700402	This study	N/A	N/A
23	Poecilia gillii	Ingroup	174515	MLBM 174515	Unnamed trib. to Río Tamarindo, ~5 km NW of El Tamarindo (around 20 km SE of León)	Río Tamarindo	Río Tamarindo	Pacific	Nicaragua	N	12.2811	-86.7511	P. sphenops	Clade 2 - 2b	2b	P. sphenops	KP700403	This study	N/A	N/A
24	Poecilia sp.	Ingroup	167961	MLBM 167961	Unnamed trib. to Quebrada de Pedernal, 300 m S of Pedernal	Río Los Encuentros	Río Estero Real	Pacific	Nicaragua	N	13.228	-86.5527	P. sphenops	Clade 2 - 2b	2b	P. sphenops	KP700218	This study	N/A	N/A
25	Poecilia sp.	Ingroup	167963	MLBM 167963	Unnamed trib. to Quebrada de Pedernal, 300 m S of Pedernal	Río Los Encuentros	Río Estero Real	Pacific	Nicaragua	N	13.228	-86.5527	P. sphenops	Clade 2 - 2b	2b	P. sphenops	KP700220	This study	KP700464	This study
26	Poecilia sp.	Ingroup	8901	STRI-NFC 8901	Quebrada Las Marias, trib. to Río Choluteca, at Orocuina	Río Choluteca	Río Choluteca	Pacific	Honduras	Hon	13.3477	-87.1743	P. sphenops	Clade 2 - 2b	2b	P. sphenops	KP699975	This study	N/A	N/A
27	Poecilia sp.	Ingroup	8902	STRI-NFC 8902	Quebrada Las Marias, trib. to Río Choluteca, at Orocuina	Río Choluteca	Río Choluteca	Pacific	Honduras	Hon	13.3477	-87.1743	P. sphenops	Clade 2 - 2b	2b	P. sphenops	KP699976	This study	N/A	N/A
28	Poecilia sp.	Ingroup	8903	STRI-NFC 8903	Quebrada Las Marias, trib. to Río Choluteca, at Orocuina	Río Choluteca	Río Choluteca	Pacific	Honduras	Hon	13.3477	-87.1743	P. sphenops	Clade 2 - 2b	2b	P. sphenops	KP699977	This study	N/A	N/A
29	Poecilia sp.	Ingroup	8906	STRI-NFC 8906	Quebrada Las Marias, trib. to Río Choluteca, at Orocuina	Río Choluteca	Río Choluteca	Pacific	Honduras	Hon	13.3477	-87.1743	P. sphenops	Clade 2 - 2b	2b	P. sphenops	KP699978	This study	N/A	N/A
30	Poecilia sp.	Ingroup	8917	STRI-NFC 8917	Río Chiquito, trib. to Río Choluteca, just off Carretera N-85 ~3 km west of Apacilagua, near Orocuina	Río Choluteca	Río Choluteca	Pacific	Honduras	Hon	13.4827	-87.099	P. sphenops	Clade 2 - 2b	2b	P. sphenops	KP699982	This study	N/A	N/A
31	Poecilia sp.	Ingroup	8872	STRI-NFC 8872	Río Chiquito at Río Nacaome in Nacaome, 200 m downstream from CA 1	Río Nacaome	Río Nacaome	Pacific	Honduras	Hon	13.5417	-87.4788	P. sphenops	Clade 2 - 2b	2b	P. sphenops	KP699972	This study	N/A	N/A
32	Poecilia "sphenops" sp.	Ingroup	8806	STRI-NFC 8806	Río Goascorán ~2.2 km SW of Goascorán and 0.7 km S of El Amatillo	Río Goascorán	Río Goascorán	Pacific	Honduras	Hon	13.5893	-87.7621	P. sphenops	Clade 2 - 2b	2b	P. sphenops	KP699965	This study	N/A	N/A
33	Poecilia sp.	Ingroup	8823	STRI-NFC 8823	Río Goascorán ~2.2 km SW of Goascorán and 0.7 km S of El Amatillo	Río Goascorán	Río Goascorán	Pacific	Honduras	Hon	13.5893	-87.7621	P. sphenops	Clade 2 - 2b	2b	P. sphenops	KP699968	This study	N/A	N/A
34	Poecilia hondurensis - P. "spheops" sp. in Alda et al. (2013)	Ingroup	8859	STRI-NFC 8859	Río Goascorán at Caridad	Río Goascorán	Río Goascorán	Pacific	Honduras	Hon	13.8277	-87.6948	P. sphenops	Clade 2 - 2b	2b	P. sphenops	KP699970	This study	KP700445	This study
35	Poecilia sp.	Ingroup	8312	STRI-NFC 8312	Río Lempa at Lempa / Nueva Ocotepeque	Río Lempa	Río Lempa	Pacific	Honduras	Hon	14.3942	-89.2082	P. sphenops	Clade 2 - 2b	2b	P. sphenops	KP699908	This study	N/A	N/A
36	Poecilia sp.	Ingroup	8314	STRI-NFC 8314	Río Lempa at Lempa / Nueva Ocotepeque	Río Lempa	Río Lempa	Pacific	Honduras	Hon	14.3942	-89.2082	P. sphenops	Clade 2 - 2b	2b	P. sphenops	KP699909	This study	KP700436	This study
37	Poecilia gillii	Ingroup	172553	MLBM 172553	Unnamed drainage ditch trib. 1 km N of Ochomogo	Lago Nicaragua	Río San Juan	Atlantic	Nicaragua	N	11.6789	-85.9882	P. sphenops	Clade 2 - 2b	2b	P. sphenops	KP700325	This study	N/A	N/A
38	Poecilia gillii	Ingroup	172554	MLBM 172554	Unnamed drainage ditch trib. 1 km N of Ochomogo	Lago Nicaragua	Río San Juan	Atlantic	Nicaragua	N	11.6789	-85.9882	P. sphenops	Clade 2 - 2b	2b-172554	P. sphenops	KP700326	This study	KP700475	This study
39	Poecilia gillii	Ingroup	174328	MLBM 174328	Trib. to Río Grande Viejo (Río Viejoio) at Nica Hwy 26 ~4.5 km NW of El Jocote (between Estelí and León)	Lago Managua	Río San Juan	Atlantic	Nicaragua	N	12.8932	-86.1791	P. sphenops	Clade 2 - 2b	2b	P. sphenops	KP700395	This study	KP700495	This study
40	Poecilia gillii	Ingroup	174329	MLBM 174329	Trib. to Río Grande Viejo (Río Viejoio) at Nica Hwy 26 ~4.5 km NW of El Jocote (between Estelí and León)	Lago Managua	Río San Juan	Atlantic	Nicaragua	N	12.8932	-86.1791	P. sphenops	Clade 2 - 2b	2b	P. sphenops	KP700396	This study	N/A	N/A
41	Poecilia gillii	Ingroup	167949	MLBM 167949	Trib. to Río Grande at La Trinidad	Lago Managua	Río San Juan	Atlantic	Nicaragua	N	12.9713	-86.2372	P. sphenops	Clade 2 - 2b	2b	P. sphenops	KP700208	This study	KP700463	This study
42	Poecilia gillii	Ingroup	173340	MLBM 173340	Río Mayales main stem	Lago Nicaragua	Río San Juan	Atlantic	Nicaragua	N	12.0668	-85.4038	P. sphenops	Clade 2 - 2b	2b	P. sphenops	KP700358	This study	N/A	N/A
43	Poecilia gillii	Ingroup	173343	MLBM 173343	Río Mayales main stem	Lago Nicaragua	Río San Juan	Atlantic	Nicaragua	N	12.0668	-85.4038	P. sphenops	Clade 2 - 2b	2b	P. sphenops	KP700360	This study	N/A	N/A
44	Poecilia gillii	Ingroup	173003	MLBM 173003	Río Caracol at Nica Hwy 7, trib. to Río Malacatoya	Lago Nicaragua	Río San Juan	Atlantic	Nicaragua	N	12.3512	-85.8887	P. sphenops	Clade 2 - 2b	2b	P. sphenops	KP700339	This study	N/A	N/A
45	Poecilia gillii	Ingroup	173004	MLBM 173004	Río Caracol at Nica Hwy 7, trib. to Río Malacatoya	Lago Nicaragua	Río San Juan	Atlantic	Nicaragua	N	12.3512	-85.8887	P. sphenops	Clade 2 - 2b	2b	P. sphenops	KP700340	This study	KP700478	This study
46	Poecilia gillii	Ingroup	173020	MLBM 173020	Trib. To Río Malacatoya at Teustepe ~27 km SW of Boaco, Departamento Boaco	Lago Nicaragua	Río San Juan	Atlantic	Nicaragua	N	12.4116	-85.7917	P. sphenops	Clade 2 - 2b	2b	P. sphenops	KP700345	This study	KP700479	This study
47	Poecilia gillii	Ingroup	173021	MLBM 173021	Trib. To Río Malacatoya at Teustepe ~27 km SW of Boaco, Departamento Boaco	Lago Nicaragua	Río San Juan	Atlantic	Nicaragua	N	12.4116	-85.7917	P. sphenops	Clade 2 - 2b	2b	P. sphenops	KP700346	This study	KP700480	This study
48	Poecilia gillii	Ingroup	173022	MLBM 173022	Trib. To Río Malacatoya at Teustepe ~27 km SW of Boaco, Departamento Boaco	Lago Nicaragua	Río San Juan	Atlantic	Nicaragua	N	12.4116	-85.7917	P. sphenops	Clade 2 - 2b	2b	P. sphenops	KP700347	This study	KP700481	This study
49	Poecilia gillii	Ingroup	173024	MLBM 173024	Trib. To Río Malacatoya at Teustepe ~27 km SW of Boaco, Departamento Boaco	Lago Nicaragua	Río San Juan	Atlantic	Nicaragua	N	12.4116	-85.7917	P. sphenops	Clade 2 - 2b	2b	P. sphenops	KP700348	This study	N/A	N/A
50	Poecilia gillii	Ingroup	173026	MLBM 173026	Trib. To Río Malacatoya at Teustepe ~27 km SW of Boaco, Departamento Boaco	Lago Nicaragua	Río San Juan	Atlantic	Nicaragua	N	12.4116	-85.7917	P. sphenops	Clade 2 - 2b	2b	P. sphenops	KP700349	This study	N/A	N/A
51	Poecilia gillii	Ingroup	173027	MLBM 173027	Trib. To Río Malacatoya at Teustepe ~27 km SW of Boaco, Departamento Boaco	Lago Nicaragua	Río San Juan	Atlantic	Nicaragua	N	12.4116	-85.7917	P. sphenops	Clade 2 - 2b	2b	P. sphenops	KP700350	This study	N/A	N/A
52	Poecilia gillii	Ingroup	168900	MLBM 168900	Unnamed trib. to Río Malacatoya at Teustepe, just off rd to Rama (Nica. 7), SW of Boaco	Lago Nicaragua	Río San Juan	Atlantic	Nicaragua	N	12.4183	-85.793	P. sphenops	Clade 2 - 2b	2b	P. sphenops	KP700305	This study	KP700469	This study
53	Poecilia gillii	Ingroup	168901	MLBM 168901	Unnamed trib. to Río Malacatoya at Teustepe, just off rd to Rama (Nica. 7), SW of Boaco	Lago Nicaragua	Río San Juan	Atlantic	Nicaragua	N	12.4183	-85.793	P. sphenops	Clade 2 - 2b	2b	P. sphenops	KP700306	This study	N/A	N/A
54	Poecilia gillii	Ingroup	168902	MLBM 168902	Unnamed trib. to Río Malacatoya at Teustepe, just off rd to Rama (Nica. 7), SW of Boaco	Lago Nicaragua	Río San Juan	Atlantic	Nicaragua	N	12.4183	-85.793	P. sphenops	Clade 2 - 2b	2b	P. sphenops	KP700307	This study	N/A	N/A
55	Poecilia sp.	Ingroup	8636	STRI-NFC 8636	Río Humuya at Ulúa / Comayagua	Río Humuya	Río Ulúa	Atlantic	Honduras	Hon	14.4537	-87.6523	P. sphenops	Clade 2 - 2b	2b	P. sphenops	KP699947	This study	N/A	N/A
56	Poecilia sp.	Ingroup	8638	STRI-NFC 8638	Río Humuya at Ulúa / Comayagua	Río Humuya	Río Ulúa	Atlantic	Honduras	Hon	14.4537	-87.6523	P. sphenops	Clade 2 - 2b	2b	P. sphenops	KP699949	This study	N/A	N/A
57	Poecilia sp.	Ingroup	8639	STRI-NFC 8639	Río Humuya at Ulúa / Comayagua	Río Humuya	Río Ulúa	Atlantic	Honduras	Hon	14.4537	-87.6523	P. sphenops	Clade 2 - 2b	2b	P. sphenops	KP699950	This study	N/A	N/A
58	Poecilia sp.	Ingroup	8375	STRI-NFC 8375	Río El Sauce (Amarillo), Copan Ruinas at cc. Motagua	Río El Sauce	Río Motagua	Atlantic	Honduras	Hon	14.8559	-89.1235	P. sphenops	Clade 2 - 2b	2b	P. sphenops	KP699925	This study	N/A	N/A
59	Poecilia sp.	Ingroup	8628	STRI-NFC 8628	Río Yojoa at Ulúa	Río Yojoa	Río Ulúa	Atlantic	Honduras	Hon	15.0348	-87.9287	P. sphenops	Clade 2 - 2b	2b	P. sphenops	KP699946	This study	N/A	N/A
60	Poecilia sp.	Ingroup	8475	STRI-NFC 8475	Río Camalote 1 km N of Macuelizo near Guatemala-Honduras border	Río Camalote	Río Ulúa	Atlantic	Honduras	Hon	15.3266	-88.6626	P. sphenops	Clade 2 - 2b	2b	P. sphenops	KP699934	This study	N/A	N/A
61	Poecilia hondurensis - P. "spheops" sp. in Alda et al. (2013)	Ingroup	8479	STRI-NFC 8479	Río Camalote 1 km N of Macuelizo near Guatemala-Honduras border	Río Camalote	Río Ulúa	Atlantic	Honduras	Hon	15.3266	-88.6626	P. sphenops	Clade 2 - 2b	2b	P. sphenops	KP699935	This study	N/A	N/A
62	Poecilia hondurensis - P. "spheops" sp. in Alda et al. (2013)	Ingroup	8409	STRI-NFC 8409	Río Naco at Ulúa	Río Naco	Río Ulúa	Atlantic	Honduras	Hon	15.3415	-88.6248	P. sphenops	Clade 2 - 2b	2b	P. sphenops	KP699927	This study	N/A	N/A
63	Poecilia gillii	Ingroup	4161	STRI-NFC 4161	Río Acla-Quebrada 2	Río Acla	Río Acla	Atlantic	Panama	Pan	8.79578	-77.6733	"gillii" sp. 2	Clade 3 Acla	3	"gillii" sp. 2	KP699835	This study	KP700427	This study
64	Poecilia gillii	Ingroup	4163	STRI-NFC 4163	Río Acla-Quebrada 2	Río Acla	Río Acla	Atlantic	Panama	Pan	8.79578	-77.6733	"gillii" sp. 2	Clade 3 Acla	3	"gillii" sp. 2	KP699836	This study	KP700428	This study
65	Poecilia gillii	Ingroup	1736	STRI-NFC 1736	Río Acla	Río Acla	Río Acla	Atlantic	Panama	Pan	8.84589	-77.6882	"gillii" sp. 2	Clade 3 Acla	3	"gillii" sp. 2	KP699810	This study	N/A	N/A
66	Poecilia gillii	Ingroup	3871	STRI-NFC 3871	Río Acla	Río Acla	Río Acla	Atlantic	Panama	Pan	8.84306	-77.6836	"gillii" sp. 2	Clade 3 Acla	3	"gillii" sp. 2	KP699834	This study	KP700426	This study
67	Poecilia gillii	Ingroup	1737	STRI-NFC 1737	Río Acla	Río Acla	Río Acla	Atlantic	Panama	Pan	8.84589	-77.6882	"gillii" sp. 2	Clade 3 Acla	3	"gillii" sp. 2	KP699811	This study	KP700424	This study
68	Poecilia gillii	Ingroup	1738	STRI-NFC 1738	Río Acla	Río Acla	Río Acla	Atlantic	Panama	Pan	8.84589	-77.6882	"gillii" sp. 2	Clade 3 Acla	3	"gillii" sp. 2	KP699812	This study	N/A	N/A
69	Poecilia hondurensis	Ingroup	8520	STRI-NFC 8520	Quebrada De Chicho between Comunidades de Achiote and Cholomena at A	Quebrada de Chico	Río Aguan	Atlantic	Honduras	Hon	15.5348	-86.2117	P. hondurensis	Clade 4	4	P. hondurensis	KP699936	This study	N/A	N/A
70	Poecilia hondurensis	Ingroup	8568	STRI-NFC 8568	Río Taujica at Taujica	Río Taujica	Río Aguan	Atlantic	Honduras	Hon	15.681	-85.9393	P. hondurensis	Clade 4	4	P. hondurensis	KP699941	This study	N/A	N/A
71	Poecilia butleri	Ingroup	Pbut2	Tobler et al. (2011)	Río Marabasco at Mexico Hwy 200, just east of Cihuatlan, Jalisco	Río Marabasco	Río Marabasco	Pacific	Mexico	Mex	19.2365	-104.554	P. butleri	Clade 6 butleri	6	Poecilia butleri	HQ677865	Tobler et al. (2011)	N/A	N/A
72	Poecilia butleri	Ingroup	Pbut1	Tobler et al. (2011)	Estero San Cristobal at San Blas, Nayarit	Río San Cristobal	Estero San Cristobal	Pacific	Mexico	Mex	21.5447	-105.274	P. butleri	Clade 6 butleri	6	Poecilia butleri	HQ677864	Tobler et al. (2011)	N/A	N/A
73	Poecilia butleri	Ingroup	Pbut4_0	Palacios et al. (2013)	Laguna de San Pedro Lagunillas at San Pedro Lagunillas, in Nayarit state	Pacific	Pacific	Pacific	Mexico	Mex	21.2141	-104.738	P. butleri	Clade 6 butleri	6	Poecilia butleri	KF276614	Palacios et al. (2013)	N/A	N/A
74	Poecilia butleri	Ingroup	Pbut1_0	Palacios et al. (2013)	Laguna de San Pedro Lagunillas at San Pedro Lagunillas, in Nayarit state	Pacific	Pacific	Pacific	Mexico	Mex	21.2141	-104.738	P. butleri	Clade 6 butleri	6	Poecilia butleri	KF276613	Palacios et al. (2013)	N/A	N/A
75	Poecilia gillii	Ingroup	11517	STRI-NFC 11517	Quebrada La Fe on new Punta Peña-Almirante Rd	Quebrada Cilico Creek	Laguna de Chiriqui	Atlantic	Panama	Pan	9.06769	-82.2917	P. gillii	Clade 5a	5a	Poecilia gillii	KP700000	This study	N/A	N/A
76	Poecilia gillii	Ingroup	23082	STRI-NFC 23082	Río San Bartolo	Río San Bartolo	Río San Bartolo	Pacific	Panama	Pan	8.28333	-82.85	P. sp. "Patuca"	Clade 5b	5b+c	Poecilia gillii (P. gillii, P. sp. "Patuca")	KP700169	This study	KP700459	This study
77	Poecilia gillii	Ingroup	18684	STRI-NFC 18684	Río Chiriqui	Río Chiriqui	Río Chiriqui	Pacific	Panama	Pan	8.68803	-82.2917	P. sp. "Patuca"	Clade 5b	5b+c	Poecilia gillii (P. gillii, P. sp. "Patuca")	KP700161	This study	N/A	N/A
78	Poecilia gillii	Ingroup	16957	STRI-NFC 16957	Río San San (Quebrada just E of Río Negro) 1 km west of Finca 6	Río San San	Río San San	Atlantic	Panama	Pan	9.47564	-82.5381	P. sp. "Patuca"	Clade 5b	5b+c	Poecilia gillii (P. gillii, P. sp. "Patuca")	KP700149	This study	N/A	N/A
79	Poecilia gillii	Ingroup	16958	STRI-NFC 16958	Río San San (Quebrada just E of Río Negro) 1 km west of Finca 6	Río San San	Río San San	Atlantic	Panama	Pan	9.47564	-82.5381	P. sp. "Patuca"	Clade 5b	5b+c	Poecilia gillii (P. gillii, P. sp. "Patuca")	KP700150	This study	N/A	N/A
80	Poecilia sp.	Ingroup	168891	MLBM 168891	Río Barbilla at province rd just W of B-Line, a few km W of the rd to Matina (dirt rd, off NE side of big rd to Puerto Limon)	Río Barbilla	Río Matina	Atlantic	Costa Rica	CR	10.0442	-83.3338	P. sp. "Patuca"	Clade 5b	5b+c	Poecilia gillii (P. gillii, P. sp. "Patuca")	KP700296	This study	N/A	N/A
81	Poecilia gillii	Ingroup	PG703.04	MLBM 235370	Río Herediana at CR Hwy 32, approximately 3 km NW of Siquirres	Río Herediana	Río Parismina	Atlantic	Costa Rica	CR	10.1242	-83.5562	P. sp. "Patuca"	Clade 5b	5b+c	Poecilia gillii (P. gillii, P. sp. "Patuca")	FJ446215	Lee & Johnson (2009)	N/A	N/A
82	Poecilia mexicana	Ingroup	8676	STRI-NFC 8676	Río Guayambre at Patuca / La Cieniguita	Río Patuca	Río Patuca	Atlantic	Honduras	Hon	14.2872	-86.1029	P. sp. "Patuca"	Clade 5b	5b+c	Poecilia gillii (P. gillii, P. sp. "Patuca")	KP699951	This study	N/A	N/A
83	Poecilia mexicana	Ingroup	8677	STRI-NFC 8677	Río Guayambre at Patuca / La Cieniguita	Río Patuca	Río Patuca	Atlantic	Honduras	Hon	14.2872	-86.1029	P. sp. "Patuca"	Clade 5b	5b+c	Poecilia gillii (P. gillii, P. sp. "Patuca")	KP699952	This study	N/A	N/A
84	Poecilia mexicana	Ingroup	8678	STRI-NFC 8678	Río Guayambre at Patuca / La Cieniguita	Río Patuca	Río Patuca	Atlantic	Honduras	Hon	14.2872	-86.1029	P. sp. "Patuca"	Clade 5b	5b+c	Poecilia gillii (P. gillii, P. sp. "Patuca")	KP699953	This study	N/A	N/A
85	Poecilia sp.	Ingroup	8705	STRI-NFC 8705	Quebrada de Mercado at Río Guayambre, trib. to Río Patuca, near La Cruz	Río Patuca	Río Patuca	Atlantic	Honduras	Hon	14.3563	-86.0652	P. sp. "Patuca"	Clade 5b	5b+c	Poecilia gillii (P. gillii, P. sp. "Patuca")	KP699954	This study	N/A	N/A
86	Poecilia sp.	Ingroup	8706	STRI-NFC 8706	Quebrada de Mercado at Río Guayambre, trib. to Río Patuca, near La Cruz	Río Patuca	Río Patuca	Atlantic	Honduras	Hon	14.3563	-86.0652	P. sp. "Patuca"	Clade 5b	5b+c	Poecilia gillii (P. gillii, P. sp. "Patuca")	KP699955	This study	N/A	N/A
87	Poecilia mexicana	Ingroup	8747	STRI-NFC 8747	Río Tepemechin, trib. to Río Patuca, at Tepemechin	Río Patuca	Río Patuca	Atlantic	Honduras	Hon	14.4018	-85.9301	P. sp. "Patuca"	Clade 5b	5b+c	Poecilia gillii (P. gillii, P. sp. "Patuca")	KP699959	This study	KP700441	This study
88	Poecilia sp.	Ingroup	8719	STRI-NFC 8719	Quebrada Carrizal, trib. to Río Patuca, at Terrero Blanco	Río Patuca	Río Patuca	Atlantic	Honduras	Hon	14.4129	-86.0401	P. sp. "Patuca"	Clade 5b	5b+c	Poecilia gillii (P. gillii, P. sp. "Patuca")	KP699956	This study	N/A	N/A
89	Poecilia mexicana	Ingroup	8722	STRI-NFC 8722	Quebrada Carrizal, trib. to Río Patuca, at Terrero Blanco	Río Patuca	Río Patuca	Atlantic	Honduras	Hon	14.4129	-86.0401	P. sp. "Patuca"	Clade 5b	5b+c	Poecilia gillii (P. gillii, P. sp. "Patuca")	KP699958	This study	KP700440	This study
90	Poecilia mexicana	Ingroup	8770	STRI-NFC 8770	Quebrada San Jose at Guayape / San Francisco de Becerra	Río Patuca	Río Patuca	Atlantic	Honduras	Hon	14.6276	-86.1424	P. sp. "Patuca"	Clade 5b	5b+c	Poecilia gillii (P. gillii, P. sp. "Patuca")	KP699960	This study	KP700442	This study
91	Poecilia mexicana	Ingroup	8771	STRI-NFC 8771	Quebrada San Jose at Guayape / San Francisco de Becerra	Río Patuca	Río Patuca	Atlantic	Honduras	Hon	14.6276	-86.1424	P. sp. "Patuca"	Clade 5b	5b+c	Poecilia gillii (P. gillii, P. sp. "Patuca")	KP699961	This study	N/A	N/A
92	Poecilia sp.	Ingroup	8774	STRI-NFC 8774	Quebrada San Jose at Guayape / San Francisco de Becerra	Río Patuca	Río Patuca	Atlantic	Honduras	Hon	14.6276	-86.1424	P. sp. "Patuca"	Clade 5b	5b+c	Poecilia gillii (P. gillii, P. sp. "Patuca")	KP699963	This study	KP700444	This study
93	Poecilia mexicana	Ingroup	8772	STRI-NFC 8772	Quebrada San Jose at Guayape / San Francisco de Becerra	Río Patuca	Río Patuca	Atlantic	Honduras	Hon	14.6276	-86.1424	P. sp. "Patuca"	Clade 5b	5b+c	Poecilia gillii (P. gillii, P. sp. "Patuca")	KP699962	This study	KP700443	This study
94	Poecilia sp.	Ingroup	8720	STRI-NFC 8720	Quebrada Carrizal, trib. to Río Patuca, at Terrero Blanco	Río Patuca	Río Patuca	Atlantic	Honduras	Hon	14.4129	-86.0401	P. sp. "Patuca"	Clade 5b	5b+c	Poecilia gillii (P. gillii, P. sp. "Patuca")	KP699957	This study	N/A	N/A
95	Poecilia gillii	Ingroup	PG708.03	MLBM 235390	Río Toro, trib. to Río Matina, just off Costa Rica Hwy 32 approximately 24 km west of Limon	Río Pascual	Río Matina	Atlantic	Costa Rica	CR	10.0168	-83.2102	P. sp. "Patuca"	Clade 5b	5b+c	Poecilia gillii (P. gillii, P. sp. "Patuca")	FJ446243	Lee & Johnson (2009)	N/A	N/A
96	Poecilia gillii	Ingroup	2589	STRI-NFC 2589	Side Lagoon 1hr upstream of Río Playon Chico	Río Playon Chico	Río Playon Chico	Atlantic	Panama	Pan	9.26611	-78.2256	P. gillii	Clade 5c	5b+c	Poecilia gillii (P. gillii, P. sp. "Patuca")	KP699819	This study	N/A	N/A
97	Poecilia gillii	Ingroup	3706	STRI-NFC 3706	Río Azucar	Río Azucar	Río Azucar	Atlantic	Panama	Pan	9.41167	-78.6458	P. gillii	Clade 5c	5b+c	Poecilia gillii (P. gillii, P. sp. "Patuca")	KP699831	This study	N/A	N/A
98	Poecilia gillii	Ingroup	3709	STRI-NFC 3709	Río Azucar	Río Azucar	Río Azucar	Atlantic	Panama	Pan	9.41167	-78.6458	P. gillii	Clade 5c	5b+c	Poecilia gillii (P. gillii, P. sp. "Patuca")	KP699832	This study	N/A	N/A
99	Poecilia gillii	Ingroup	3710	STRI-NFC 3710	Río Azucar	Río Azucar	Río Azucar	Atlantic	Panama	Pan	9.41167	-78.6458	P. gillii	Clade 5c	5b+c	Poecilia gillii (P. gillii, P. sp. "Patuca")	KP699833	This study	N/A	N/A
100	Poecilia gillii	Ingroup	11120	STRI-NFC 11120	Quebrada El Nance, trib. to Río Santa Maria	Quebrada El Nance	Río Santa Maria	Pacific	Panama	Pan	8.41317	-81.0485	P. gillii	Clade 5c	5b+c	Poecilia gillii (P. gillii, P. sp. "Patuca")	KP699994	This study	N/A	N/A
101	Poecilia gillii	Ingroup	17114	STRI-NFC 17114	Quebrada El Nance, trib. to Río Santa Maria	Quebrada El Nance	Río Santa Maria	Pacific	Panama	Pan	8.41322	-82.048	P. gillii	Clade 5c	5b+c	Poecilia gillii (P. gillii, P. sp. "Patuca")	KP700152	This study	N/A	N/A
102	Poecilia gillii	Ingroup	12377	STRI-NFC 12377	Río Cricamola	Río Cricamola	Río Cricamola	Atlantic	Panama	Pan	8.91728	-81.8773	P. gillii	Clade 5c	5b+c	Poecilia gillii (P. gillii, P. sp. "Patuca")	KP700007	This study	N/A	N/A
103	Poecilia gillii	Ingroup	7447	STRI-NFC 7447	Quebrada Mandingo, Río Velasque	Río Velasque	Río Grande	Pacific	Panama	Pan	8.9626	-79.5901	P. gillii	Clade 5c	5b+c	Poecilia gillii (P. gillii, P. sp. "Patuca")	KP699867	This study	N/A	N/A
104	Poecilia gillii	Ingroup	3610	STRI-NFC 3610	Río Ipeti	Río Bayano	Río Bayano	Pacific	Panama	Pan	8.97944	-78.5056	P. gillii	Clade 5c	5b+c	Poecilia gillii (P. gillii, P. sp. "Patuca")	KP699829	This study	N/A	N/A
105	Poecilia gillii	Ingroup	3615	STRI-NFC 3615	Río Ipeti	Río Bayano	Río Bayano	Pacific	Panama	Pan	8.97944	-78.5056	P. gillii	Clade 5c	5b+c	Poecilia gillii (P. gillii, P. sp. "Patuca")	KP699830	This study	N/A	N/A
106	Poecilia gillii	Ingroup	16423	STRI-NFC 16423	Between Piriati and Quebrada Cali on the IAH to Darien	Río Bayano	Río Bayano	Pacific	Panama	Pan	9.05267	-78.647	P. gillii	Clade 5c	5b+c	Poecilia gillii (P. gillii, P. sp. "Patuca")	KP700117	This study	N/A	N/A
107	Poecilia gillii	Ingroup	11337	STRI-NFC 11337	Río Parti	Río Bayano	Río Bayano	Pacific	Panama	Pan	9.056	-78.6595	P. gillii	Clade 5c	5b+c	Poecilia gillii (P. gillii, P. sp. "Patuca")	KP699997	This study	KP700448	This study
108	Poecilia gillii	Ingroup	15854	STRI-NFC 15854	Río Pedro Miguel just off Av. Madden	Río Grande	Panama Canal	Pacific	Panama	Pan	9.08067	-79.6251	P. gillii	Clade 5c	5b+c	Poecilia gillii (P. gillii, P. sp. "Patuca")	KP700095	This study	N/A	N/A
109	Poecilia gillii	Ingroup	2703	STRI-NFC 2703	Río Pacora, ~3 km W of Paso Blanco off Av. Jose Agustin Arango (~1 mile above hwy)	Río Pacora	Río Pacora	Pacific	Panama	Pan	9.12306	-79.2625	P. gillii	Clade 5c	5b+c	Poecilia gillii (P. gillii, P. sp. "Patuca")	KP699820	This study	N/A	N/A
110	Poecilia gillii	Ingroup	2704	STRI-NFC 2704	Río Pacora, ~3 km W of Paso Blanco off Av. Jose Agustin Arango (~1 mile above hwy)	Río Pacora	Río Pacora	Pacific	Panama	Pan	9.12306	-79.2625	P. gillii	Clade 5c	5b+c	Poecilia gillii (P. gillii, P. sp. "Patuca")	KP699821	This study	N/A	N/A
111	Poecilia gillii	Ingroup	4518	STRI-NFC 4518	Río Tranca	Río Tranca	Río Bayano	Pacific	Panama	Pan	9.13806	-79.2092	P. gillii	Clade 5c	5b+c	Poecilia gillii (P. gillii, P. sp. "Patuca")	KP699840	This study	N/A	N/A
112	Poecilia gillii	Ingroup	4519	STRI-NFC 4519	Río Tranca	Río Tranca	Río Bayano	Pacific	Panama	Pan	9.13806	-79.2092	P. gillii	Clade 5c	5b+c	Poecilia gillii (P. gillii, P. sp. "Patuca")	KP699841	This study	N/A	N/A
113	Poecilia gillii	Ingroup	18620	STRI-NFC 18620	Lago Gatun	Río Chagres	Panama Canal	Atlantic	Panama	Pan	9.15689	-79.9641	P. gillii	Clade 5c	5b+c	Poecilia gillii (P. gillii, P. sp. "Patuca")	KP700157	This study	N/A	N/A
114	Poecilia gillii	Ingroup	2887	STRI-NFC 2887	Río Chichebre	Río Chichebre	Río Bayano	Pacific	Panama	Pan	9.15889	-79.1564	P. gillii	Clade 5c	5b+c	Poecilia gillii (P. gillii, P. sp. "Patuca")	KP699825	This study	N/A	N/A
115	Poecilia gillii	Ingroup	11373	STRI-NFC 11373	Río Chichebre	Río Chichebre	Río Bayano	Pacific	Panama	Pan	9.16083	-79.1542	P. gillii	Clade 5c	5b+c	Poecilia gillii (P. gillii, P. sp. "Patuca")	KP699998	This study	N/A	N/A
116	Poecilia gillii	Ingroup	937	STRI-NFC 937	Río Bayano-B	Río Bayano	Río Bayano	Pacific	Panama	Pan	9.177	-78.7457	P. gillii	Clade 5c	5b+c	Poecilia gillii (P. gillii, P. sp. "Patuca")	KP699792	This study	N/A	N/A
117	Poecilia gillii	Ingroup	938	STRI-NFC 938	Río Bayano-B	Río Bayano	Río Bayano	Pacific	Panama	Pan	9.177	-78.7457	P. gillii	Clade 5c	5b+c	Poecilia gillii (P. gillii, P. sp. "Patuca")	KP699793	This study	KP700417	This study
118	Poecilia gillii	Ingroup	18613	STRI-NFC 18613	Río Canita	Río Canita	Río Bayano	Pacific	Panama	Pan	9.2	-78.9167	P. gillii	Clade 5c	5b+c	Poecilia gillii (P. gillii, P. sp. "Patuca")	KP700156	This study	N/A	N/A
119	Poecilia gillii	Ingroup	2875	STRI-NFC 2875	Río Garrapata	Río Garrapata	Río Bayano	Pacific	Panama	Pan	9.2267	-79.0303	P. gillii	Clade 5c	5b+c	Poecilia gillii (P. gillii, P. sp. "Patuca")	KP699823	This study	N/A	N/A
120	Poecilia gillii	Ingroup	2879	STRI-NFC 2879	Río Garrapata	Río Garrapata	Río Bayano	Pacific	Panama	Pan	9.2267	-79.0303	P. gillii	Clade 5c	5b+c	Poecilia gillii (P. gillii, P. sp. "Patuca")	KP699824	This study	N/A	N/A
121	Poecilia gillii	Ingroup	12290	STRI-NFC 12290	Río Aguas Claras	Río Aguas Claras	Río Bayano	Pacific	Panama	Pan	9.27381	-78.6813	P. gillii	Clade 5c	5b+c	Poecilia gillii (P. gillii, P. sp. "Patuca")	KP700003	This study	N/A	N/A
122	Poecilia gillii	Ingroup	2073	STRI-NFC 2073	Río Terraba	Río Terraba	Río Terraba	Pacific	Costa Rica	CR	9.28493	-83.6457	P. gillii	Clade 5c	5b+c	Poecilia gillii (P. gillii, P. sp. "Patuca")	KP699814	This study	N/A	N/A
123	Poecilia gillii	Ingroup	18627	STRI-NFC 18627	Río Gatuncillo	Río Gatuncillo	Río Chagres	Atlantic	Panama	Pan	9.30817	-79.6334	P. gillii	Clade 5c	5b+c	Poecilia gillii (P. gillii, P. sp. "Patuca")	KP700158	This study	N/A	N/A
124	Poecilia gillii	Ingroup	16419	STRI-NFC 16419	First bridge east of Palenque, Colon	Río Cuango	Río Cuango	Atlantic	Panama	Pan	9.57053	-79.3583	P. gillii	Clade 5c	5b+c	Poecilia gillii (P. gillii, P. sp. "Patuca")	KP700115	This study	N/A	N/A
125	Poecilia gillii	Ingroup	16421	STRI-NFC 16421	Nombre de Dios	Río Cuango	Río Cuango	Atlantic	Panama	Pan	9.57067	-79.4364	P. gillii	Clade 5c	5b+c	Poecilia gillii (P. gillii, P. sp. "Patuca")	KP700116	This study	N/A	N/A
126	Poecilia gillii	Ingroup	8350	STRI-NFC 8350	Río Ulúa at Ulúa / Cucuyagua	Río Ulúa	Río Ulúa	Atlantic	Honduras	Hon	14.651	-88.8814	P. gillii	Clade 5c	5b+c	Poecilia gillii (P. gillii, P. sp. "Patuca")	KP699913	This study	N/A	N/A
127	Poecilia gillii	Ingroup	12345	STRI-NFC 12345	Río San Pedro at San Pedro	Río San Pedro	Río Cocle del Norte	Atlantic	Panama	Pan	8.72681	-80.2194	P. gillii	Clade 5c	5b+c	Poecilia gillii (P. gillii, P. sp. "Patuca")	KP700004	This study	KP700449	This study
128	Poecilia gillii	Ingroup	1367	STRI-NFC 1367	Río Cocle del Norte	Río Cocle del Norte	Río Cocle del Norte	Atlantic	Panama	Pan	8.81867	-80.553	P. gillii	Clade 5c	5b+c	Poecilia gillii (P. gillii, P. sp. "Patuca")	KP699808	This study	N/A	N/A
129	Poecilia gillii	Ingroup	1368	STRI-NFC 1368	Río Cocle del Norte	Río Cocle del Norte	Río Cocle del Norte	Atlantic	Panama	Pan	8.81867	-80.553	P. gillii	Clade 5c	5b+c	Poecilia gillii (P. gillii, P. sp. "Patuca")	KP699809	This study	N/A	N/A
130	Poecilia gillii	Ingroup	7448	STRI-NFC 7448	Quebrada Mandingo, Río Velasque	Quebrada Mandingo	Río Grande	Pacific	Panama	Pan	8.9626	-79.5901	P. gillii	Clade 5c	5b+c	Poecilia gillii (P. gillii, P. sp. "Patuca")	KP699868	This study	N/A	N/A
131	Poecilia gillii	Ingroup	11540	STRI-NFC 11540	Small creek on Punta Peña-Almirante Rd	Río Robalo	Río Robalo	Atlantic	Panama	Pan	9.01667	-82.3093	P. gillii	Clade 5c	5b+c	Poecilia gillii (P. gillii, P. sp. "Patuca")	KP700001	This study	N/A	N/A
132	Poecilia gillii	Ingroup	16935	STRI-NFC 16935	Río Chichebre	Río Chichebre	Río Bayano	Pacific	Panama	Pan	9.15889	-79.1564	P. gillii	Clade 5c	5b+c	Poecilia gillii (P. gillii, P. sp. "Patuca")	KP700148	This study	N/A	N/A
133	Poecilia gillii	Ingroup	16272	STRI-NFC 16272	Río Piedras	Río Piedras	Río Chagres	Atlantic	Panama	Pan	9.30156	-79.3315	P. gillii	Clade 5c	5b+c	Poecilia gillii (P. gillii, P. sp. "Patuca")	KP700112	This study	N/A	N/A
134	Poecilia gillii	Ingroup	16300	STRI-NFC 16300	Río Piedras	Río Piedras	Río Chagres	Atlantic	Panama	Pan	9.30156	-79.3315	P. gillii	Clade 5c	5b+c	Poecilia gillii (P. gillii, P. sp. "Patuca")	KP700113	This study	N/A	N/A
135	Poecilia gillii	Ingroup	16216	STRI-NFC 16216	Río Chagres	Río Chagres	Río Chagres	Atlantic	Panama	Pan	9.35964	-79.2788	P. gillii	Clade 5c	5b+c	Poecilia gillii (P. gillii, P. sp. "Patuca")	KP700107	This study	N/A	N/A
136	Poecilia gillii	Ingroup	16223	STRI-NFC 16223	Río Chagres	Río Chagres	Río Chagres	Atlantic	Panama	Pan	9.35964	-79.2788	P. gillii	Clade 5c	5b+c	Poecilia gillii (P. gillii, P. sp. "Patuca")	KP700108	This study	N/A	N/A
137	Poecilia gillii	Ingroup	16244	STRI-NFC 16244	Río Chagres	Río Chagres	Río Chagres	Atlantic	Panama	Pan	9.35964	-79.2788	P. gillii	Clade 5c	5b+c	Poecilia gillii (P. gillii, P. sp. "Patuca")	KP700109	This study	N/A	N/A
138	Poecilia gillii	Ingroup	15184	STRI-NFC 15184	Río Chagres	Río Chagres	Río Chagres	Atlantic	Panama	Pan	9.36008	-79.3222	P. gillii	Clade 5c	5b+c	Poecilia gillii (P. gillii, P. sp. "Patuca")	KP700079	This study	N/A	N/A
139	Poecilia gillii	Ingroup	15185	STRI-NFC 15185	Río Chagres	Río Chagres	Río Chagres	Atlantic	Panama	Pan	9.36008	-79.3222	P. gillii	Clade 5c	5b+c	Poecilia gillii (P. gillii, P. sp. "Patuca")	KP700080	This study	N/A	N/A
140	Poecilia gillii	Ingroup	16256	STRI-NFC 16256	Río Chagres	Río Chagres	Río Chagres	Atlantic	Panama	Pan	9.36728	-79.2606	P. gillii	Clade 5c	5b+c	Poecilia gillii (P. gillii, P. sp. "Patuca")	KP700110	This study	N/A	N/A
141	Poecilia gillii	Ingroup	16260	STRI-NFC 16260	Río Chagres	Río Chagres	Río Chagres	Atlantic	Panama	Pan	9.36728	-79.2606	P. gillii	Clade 5c	5b+c	Poecilia gillii (P. gillii, P. sp. "Patuca")	KP700111	This study	N/A	N/A
142	Poecilia gillii	Ingroup	16438	STRI-NFC 16438	Río Piedras	Río Piedras	Río Chagres	Atlantic	Panama	Pan	9.37422	-79.3587	P. gillii	Clade 5c	5b+c	Poecilia gillii (P. gillii, P. sp. "Patuca")	KP700118	This study	N/A	N/A
143	Poecilia gillii	Ingroup	16439	STRI-NFC 16439	Río Piedras	Río Piedras	Río Chagres	Atlantic	Panama	Pan	9.37422	-79.3587	P. gillii	Clade 5c	5b+c	Poecilia gillii (P. gillii, P. sp. "Patuca")	KP700119	This study	KP700455	This study
144	Poecilia gillii	Ingroup	16440	STRI-NFC 16440	Río Piedras	Río Piedras	Río Chagres	Atlantic	Panama	Pan	9.37422	-79.3587	P. gillii	Clade 5c	5b+c	Poecilia gillii (P. gillii, P. sp. "Patuca")	KP700120	This study	N/A	N/A
145	Poecilia gillii	Ingroup	1320	STRI-NFC 1320	Río Mandinga (Golfo de San Blas)	Río Mandinga	Río Mandinga	Atlantic	Panama	Pan	9.46995	-79.1242	P. gillii	Clade 5c	5b+c	Poecilia gillii (P. gillii, P. sp. "Patuca")	KP699804	This study	N/A	N/A
146	Poecilia gillii	Ingroup	1321	STRI-NFC 1321	Río Mandinga (Golfo de San Blas)	Río Mandinga	Río Mandinga	Atlantic	Panama	Pan	9.46995	-79.1242	P. gillii	Clade 5c	5b+c	Poecilia gillii (P. gillii, P. sp. "Patuca")	KP699805	This study	N/A	N/A
147	Poecilia gillii	Ingroup	1322	STRI-NFC 1322	Río Mandinga (Golfo de San Blas)	Río Mandinga	Río Mandinga	Atlantic	Panama	Pan	9.46995	-79.1242	P. gillii	Clade 5c	5b+c	Poecilia gillii (P. gillii, P. sp. "Patuca")	KP699806	This study	N/A	N/A
148	Poecilia sp.	Ingroup	PslLaGl3_0	Palacios et al. (2013)	La Gloria	Río Pichucalco	Río Pichucalco	Atlantic	Mexico	Mex	17.532	-93.0151	uncertain (P. sulphuraria, P. thermalis, P. m. limantouri)	Clade 7a	7	uncertain (P. sulphuraria, P. thermalis, P. m. limantouri)	KF276628	Palacios et al. (2013)	N/A	N/A
149	Poecilia sp.	Ingroup	PslLaGl1_0	Palacios et al. (2013)	La Gloria	Río Pichucalco	Río Pichucalco	Atlantic	Mexico	Mex	17.532	-93.0151	uncertain (P. sulphuraria, P. thermalis, P. m. limantouri)	Clade 7a	7	uncertain (P. sulphuraria, P. thermalis, P. m. limantouri)	KF276627	Palacios et al. (2013)	N/A	N/A
150	Poecilia sp.	Ingroup	PslLaGlr_0	Palacios et al. (2013)	La Gloria	Río Pichucalco	Río Pichucalco	Atlantic	Mexico	Mex	17.532	-93.0151	uncertain (P. sulphuraria, P. thermalis, P. m. limantouri)	Clade 7a	7	uncertain (P. sulphuraria, P. thermalis, P. m. limantouri)	KF276626	Palacios et al. (2013)	N/A	N/A
151	Poecilia sulphuraria	Ingroup	Psulp39	Tobler et al. (2011)	La Gloria, Río Pichucalco	Río Pichucalco	Río Pichucalco	Atlantic	Mexico	Mex	17.532	-93.0151	uncertain (P. sulphuraria, P. thermalis, P. m. limantouri)	Clade 7a	7	uncertain (P. sulphuraria, P. thermalis, P. m. limantouri)	HQ677902	Tobler et al. (2011)	N/A	N/A
152	Poecilia sulphuraria	Ingroup	Psulp38	Tobler et al. (2011)	La Gloria, Río Pichucalco	Río Pichucalco	Río Pichucalco	Atlantic	Mexico	Mex	17.532	-93.0151	uncertain (P. sulphuraria, P. thermalis, P. m. limantouri)	Clade 7a	7	uncertain (P. sulphuraria, P. thermalis, P. m. limantouri)	HQ677901	Tobler et al. (2011)	N/A	N/A
153	Poecilia sulphuraria	Ingroup	Psulp37	Tobler et al. (2011)	La Gloria, Río Pichucalco	Río Pichucalco	Río Pichucalco	Atlantic	Mexico	Mex	17.532	-93.0151	uncertain (P. sulphuraria, P. thermalis, P. m. limantouri)	Clade 7a	7	uncertain (P. sulphuraria, P. thermalis, P. m. limantouri)	HQ677900	Tobler et al. (2011)	N/A	N/A
154	Poecilia sp.	Ingroup	PslBan3_0	Palacios et al. (2013)	Baños del Azufre	Río Pichucalco	Río Pichucalco	Atlantic	Mexico	Mex	17.552	-92.999	uncertain (P. sulphuraria, P. thermalis, P. m. limantouri)	Clade 7a	7	uncertain (P. sulphuraria, P. thermalis, P. m. limantouri)	KF276625	Palacios et al. (2013)	N/A	N/A
155	Poecilia sp.	Ingroup	PslBan2_0	Palacios et al. (2013)	Baños del Azufre	Río Pichucalco	Río Pichucalco	Atlantic	Mexico	Mex	17.552	-92.999	uncertain (P. sulphuraria, P. thermalis, P. m. limantouri)	Clade 7a	7	uncertain (P. sulphuraria, P. thermalis, P. m. limantouri)	KF276624	Palacios et al. (2013)	N/A	N/A
156	Poecilia sulphuraria	Ingroup	Psulp41	Tobler et al. (2011)	La Gloria, Río Pichucalco	Río Pichucalco	Río Pichucalco	Atlantic	Mexico	Mex	17.532	-93.0151	uncertain (P. sulphuraria, P. thermalis, P. m. limantouri)	Clade 7a	7	uncertain (P. sulphuraria, P. thermalis, P. m. limantouri)	HQ677904	Tobler et al. (2011)	N/A	N/A
157	Poecilia sulphuraria	Ingroup	Psulp40	Tobler et al. (2011)	La Gloria, Río Pichucalco	Río Pichucalco	Río Pichucalco	Atlantic	Mexico	Mex	17.532	-93.0151	uncertain (P. sulphuraria, P. thermalis, P. m. limantouri)	Clade 7a	7	uncertain (P. sulphuraria, P. thermalis, P. m. limantouri)	HQ677903	Tobler et al. (2011)	N/A	N/A
158	Poecilia thermalis	Ingroup	PthrS3-0	Palacios et al. (2013)	La Esperanza small spring	Río Ixtapangajoya	Río Ixtapangajoya	Atlantic	Mexico	Mex	17.511	-92.98	uncertain (P. sulphuraria, P. thermalis, P. m. limantouri)	Clade 7a	7	uncertain (P. sulphuraria, P. thermalis, P. m. limantouri)	KF276622	Palacios et al. (2013)	N/A	N/A
159	Poecilia thermalis	Ingroup	PthrS2-0	Palacios et al. (2013)	La Esperanza small spring	Río Ixtapangajoya	Río Ixtapangajoya	Atlantic	Mexico	Mex	17.511	-92.98	uncertain (P. sulphuraria, P. thermalis, P. m. limantouri)	Clade 7a	7	uncertain (P. sulphuraria, P. thermalis, P. m. limantouri)	KF276621	Palacios et al. (2013)	N/A	N/A
160	Poecilia thermalis	Ingroup	PthrSm-0	Palacios et al. (2013)	La Esperanza small spring	Río Ixtapangajoya	Río Ixtapangajoya	Atlantic	Mexico	Mex	17.511	-92.98	uncertain (P. sulphuraria, P. thermalis, P. m. limantouri)	Clade 7a	7	uncertain (P. sulphuraria, P. thermalis, P. m. limantouri)	KF276620	Palacios et al. (2013)	N/A	N/A
161	Poecilia thermalis	Ingroup	PthrL3-0	Palacios et al. (2013)	La Esperanza large spring	Río Ixtapangajoya	Río Ixtapangajoya	Atlantic	Mexico	Mex	17.511	-92.983	uncertain (P. sulphuraria, P. thermalis, P. m. limantouri)	Clade 7a	7	uncertain (P. sulphuraria, P. thermalis, P. m. limantouri)	KF276619	Palacios et al. (2013)	N/A	N/A
162	Poecilia thermalis	Ingroup	PthrL2-0	Palacios et al. (2013)	La Esperanza large spring	Río Ixtapangajoya	Río Ixtapangajoya	Atlantic	Mexico	Mex	17.511	-92.983	uncertain (P. sulphuraria, P. thermalis, P. m. limantouri)	Clade 7a	7	uncertain (P. sulphuraria, P. thermalis, P. m. limantouri)	KF276618	Palacios et al. (2013)	N/A	N/A
163	Poecilia thermalis	Ingroup	PthrLa-0	Palacios et al. (2013)	La Esperanza large spring	Río Ixtapangajoya	Río Ixtapangajoya	Atlantic	Mexico	Mex	17.511	-92.983	uncertain (P. sulphuraria, P. thermalis, P. m. limantouri)	Clade 7a	7	uncertain (P. sulphuraria, P. thermalis, P. m. limantouri)	KF276617	Palacios et al. (2013)	N/A	N/A
164	Poecilia sp.	Ingroup	PslBanos_0	Palacios et al. (2013)	Baños del Azufre	Río Pichucalco	Río Pichucalco	Atlantic	Mexico	Mex	17.552	-92.999	uncertain (P. sulphuraria, P. thermalis, P. m. limantouri)	Clade 7a	7	uncertain (P. sulphuraria, P. thermalis, P. m. limantouri)	KF276623	Palacios et al. (2013)	N/A	N/A
165	Poecilia sp.	Ingroup	7826	STRI-NFC 7826	Las Conchas, Pueblo Canhuinic	Río Usumacinta	Río Usumacinta	Atlantic	Guatemala	Guat	15.8323	-90.3338	uncertain (P. sulphuraria, P. thermalis, P. m. limantouri)	Clade 7b	7	uncertain (P. sulphuraria, P. thermalis, P. m. limantouri)	KP699871	This study	N/A	N/A
166	Poecilia sp.	Ingroup	7833	STRI-NFC 7833	Las Conchas, Pueblo Canhuinic	Río Usumacinta	Río Usumacinta	Atlantic	Guatemala	Guat	15.8323	-90.3338	uncertain (P. sulphuraria, P. thermalis, P. m. limantouri)	Clade 7b	7	uncertain (P. sulphuraria, P. thermalis, P. m. limantouri)	KP699873	This study	N/A	N/A
167	Poecilia sp.	Ingroup	7827	STRI-NFC 7827	Las Conchas, Pueblo Canhuinic	Río Usumacinta	Río Usumacinta	Atlantic	Guatemala	Guat	15.8323	-90.3338	uncertain (P. sulphuraria, P. thermalis, P. m. limantouri)	Clade 7b	7	uncertain (P. sulphuraria, P. thermalis, P. m. limantouri)	KP699872	This study	N/A	N/A
168	P. mexicana limantouri	Ingroup	PmlSnPe_0	Palacios et al. (2013)	San Pedro, in Hidalgo state (georeferenced to river at Ruta 106 just north of San Pedro)	Río Panuco	Río Panuco	Atlantic	Mexico	Mex	20.1675	-98.2618	uncertain (P. sulphuraria, P. thermalis, P. m. limantouri)	Clade 7b	7	uncertain (P. sulphuraria, P. thermalis, P. m. limantouri)	KF276635	Palacios et al. (2013)	N/A	N/A
169	P. mexicana limantouri	Ingroup	PmlmPep_0	Palacios et al. (2013)	Pepeyocatitla, in Hidalgo state (georeferenced to river at major road just east of Pepeyocatitla)	Río Panuco	Río Panuco	Atlantic	Mexico	Mex	20.9128	-98.392	uncertain (P. sulphuraria, P. thermalis, P. m. limantouri)	Clade 7b	7	uncertain (P. sulphuraria, P. thermalis, P. m. limantouri)	KF276634	Palacios et al. (2013)	N/A	N/A
170	P. mexicana limantouri	Ingroup	Pmlim13	Tobler et al. (2011)	Río Soto la Marina, trib. to Río Palmas (georeferenced to Río Soto la Marina at Mexican Hwy 180, Soto la Marina, Tamaulipas)	Río Soto la Marina	Río Soto la Marina	Atlantic	Mexico	Mex	23.7606	-98.2061	uncertain (P. sulphuraria, P. thermalis, P. m. limantouri)	Clade 7b	7	uncertain (P. sulphuraria, P. thermalis, P. m. limantouri)	HQ677876	Tobler et al. (2011)	N/A	N/A
171	P. mexicana limantouri	Ingroup	Pmlim12	Tobler et al. (2011)	Río Soto la Marina, trib. to Río Palmas (georeferenced to Río Soto la Marina at Mexican Hwy 180, Soto la Marina, Tamaulipas)	Río Soto la Marina	Río Soto la Marina	Atlantic	Mexico	Mex	23.7606	-98.2061	uncertain (P. sulphuraria, P. thermalis, P. m. limantouri)	Clade 7b	7	uncertain (P. sulphuraria, P. thermalis, P. m. limantouri)	HQ677875	Tobler et al. (2011)	N/A	N/A
172	P. mexicana limantouri	Ingroup	Pmlim11	Tobler et al. (2011)	Río Soto la Marina, trib. to Río Palmas (georeferenced to Río Soto la Marina at Mexican Hwy 180, Soto la Marina, Tamaulipas)	Río Soto la Marina	Río Soto la Marina	Atlantic	Mexico	Mex	23.7606	-98.2061	uncertain (P. sulphuraria, P. thermalis, P. m. limantouri)	Clade 7b	7	uncertain (P. sulphuraria, P. thermalis, P. m. limantouri)	HQ677874	Tobler et al. (2011)	N/A	N/A
173	P. mexicana limantouri	Ingroup	Pmlim10	Tobler et al. (2011)	Río Soto la Marina, trib. to Río Palmas (georeferenced to Río Soto la Marina at Mexican Hwy 180, Soto la Marina, Tamaulipas)	Río Soto la Marina	Río Soto la Marina	Atlantic	Mexico	Mex	23.7606	-98.2061	uncertain (P. sulphuraria, P. thermalis, P. m. limantouri)	Clade 7b	7	uncertain (P. sulphuraria, P. thermalis, P. m. limantouri)	HQ677873	Tobler et al. (2011)	N/A	N/A
174	P. mexicana limantouri	Ingroup	Pmlim9	Tobler et al. (2011)	Río Soto la Marina, trib. to Río Palmas (georeferenced to Río Soto la Marina at Mexican Hwy 180, Soto la Marina, Tamaulipas)	Río Soto la Marina	Río Soto la Marina	Atlantic	Mexico	Mex	23.7606	-98.2061	uncertain (P. sulphuraria, P. thermalis, P. m. limantouri)	Clade 7b	7	uncertain (P. sulphuraria, P. thermalis, P. m. limantouri)	HQ677872	Tobler et al. (2011)	N/A	N/A
175	P. mexicana limantouri	Ingroup	Pmlim8	Tobler et al. (2011)	Río Soto la Marina, trib. to Río Palmas (georeferenced to Río Soto la Marina at Mexican Hwy 180, Soto la Marina, Tamaulipas)	Río Soto la Marina	Río Soto la Marina	Atlantic	Mexico	Mex	23.7606	-98.2061	uncertain (P. sulphuraria, P. thermalis, P. m. limantouri)	Clade 7b	7	uncertain (P. sulphuraria, P. thermalis, P. m. limantouri)	HQ677871	Tobler et al. (2011)	N/A	N/A
176	P. mexicana limantouri	Ingroup	Pmlim7	Tobler et al. (2011)	Río Soto la Marina, trib. to Río Palmas (georeferenced to Río Soto la Marina at Mexican Hwy 180, Soto la Marina, Tamaulipas)	Río Soto la Marina	Río Soto la Marina	Atlantic	Mexico	Mex	23.7606	-98.2061	uncertain (P. sulphuraria, P. thermalis, P. m. limantouri)	Clade 7b	7	uncertain (P. sulphuraria, P. thermalis, P. m. limantouri)	HQ677870	Tobler et al. (2011)	N/A	N/A
177	P. mexicana limantouri	Ingroup	Pmlim6	Tobler et al. (2011)	Río Soto la Marina, trib. to Río Palmas (georeferenced to Río Soto la Marina at Mexican Hwy 180, Soto la Marina, Tamaulipas)	Río Soto la Marina	Río Soto la Marina	Atlantic	Mexico	Mex	23.7606	-98.2061	uncertain (P. sulphuraria, P. thermalis, P. m. limantouri)	Clade 7b	7	uncertain (P. sulphuraria, P. thermalis, P. m. limantouri)	HQ677869	Tobler et al. (2011)	N/A	N/A
178	Poecilia gillii	Ingroup	172455	MLBM 172455	Lago Jiloa	Lago Jiloa	Lago Jiloa	Atlantic	Nicaragua	N	12.2186	-86.3119	P. mexicana	Clade 8a	8	P. mexicana	KP700316	This study	KP700472	This study
179	Poecilia gillii	Ingroup	172461	MLBM 172461	Lago Jiloa	Lago Jiloa	Lago Jiloa	Atlantic	Nicaragua	N	12.2186	-86.3119	P. mexicana	Clade 8a	8	P. mexicana	KP700319	This study	N/A	N/A
180	Poecilia gillii	Ingroup	173959	MLBM 173959	Unnamed trib. to Río Ojucuapa at San Roque (Comarca Santa Marta) off unnamed road, ~2 km SW of Hwy 25	Lago Nicaragua	Río San Juan	Atlantic	Nicaragua	N	11.8294	-85.2048	P. mexicana	Clade 8a	8	P. mexicana	KP700374	This study	N/A	N/A
181	Poecilia gillii	Ingroup	172459	MLBM 172459	Lago Jiloa	Lago Jiloa	Lago Jiloa	Atlantic	Nicaragua	N	12.2186	-86.3119	P. mexicana	Clade 8a	8	P. mexicana	KP700317	This study	N/A	N/A
182	Poecilia gillii	Ingroup	172460	MLBM 172460	Lago Jiloa	Lago Jiloa	Lago Jiloa	Atlantic	Nicaragua	N	12.2186	-86.3119	P. mexicana	Clade 8a	8	P. mexicana	KP700318	This study	N/A	N/A
183	Poecilia gillii	Ingroup	172462	MLBM 172462	Lago Jiloa	Lago Jiloa	Lago Jiloa	Atlantic	Nicaragua	N	12.2186	-86.3119	P. mexicana	Clade 8a	8	P. mexicana	KP700320	This study	N/A	N/A
184	Poecilia gillii	Ingroup	174259	MLBM 174259	Río Telica at Telica, just west (downstream) of Nica Hwy 12, ~12 km N of Leon	Río Telica	Río Telica	Pacific	Nicaragua	N	12.5166	-86.8654	P. mexicana	Clade 8a	8	P. mexicana	KP700390	This study	N/A	N/A
185	Poecilia gillii	Ingroup	174260	MLBM 174260	Río Telica at Telica, just west (downstream) of Nica Hwy 12, ~12 km N of Leon	Río Telica	Río Telica	Pacific	Nicaragua	N	12.5166	-86.8654	P. mexicana	Clade 8a	8	P. mexicana	KP700391	This study	N/A	N/A
186	Poecilia gillii	Ingroup	174261	MLBM 174261	Río Telica at Telica, just west (downstream) of Nica Hwy 12, ~12 km N of Leon	Río Telica	Río Telica	Pacific	Nicaragua	N	12.5166	-86.8654	P. mexicana	Clade 8a	8	P. mexicana	KP700392	This study	N/A	N/A
187	Poecilia gillii	Ingroup	174262	MLBM 174262	Río Telica at Telica, just west (downstream) of Nica Hwy 12, ~12 km N of Leon	Río Telica	Río Telica	Pacific	Nicaragua	N	12.5166	-86.8654	P. mexicana	Clade 8a	8	P. mexicana	KP700393	This study	N/A	N/A
188	Poecilia gillii	Ingroup	174330	MLBM 174330	Trib. to Río Grande Viejo (Río Viejoio) at Nica Hwy 26 ~4.5 km NW of El Jocote (between Estelí and León)	Lago Managua	Río San Juan	Atlantic	Nicaragua	N	12.8932	-86.1791	P. mexicana	Clade 8a	8	P. mexicana	KP700397	This study	N/A	N/A
189	Poecilia sp.	Ingroup	8914	STRI-NFC 8914	Río Chiquito, trib. to Río Choluteca, just off Carretera N-85 ~3 km west of Apacilagua, near Orocuina	Río Choluteca	Río Choluteca	Pacific	Honduras	Hon	13.4827	-87.099	P. mexicana	Clade 8a	8	P. mexicana	KP699979	This study	N/A	N/A
190	Poecilia sp.	Ingroup	8915	STRI-NFC 8915	Río Chiquito, trib. to Río Choluteca, just off Carretera N-85 ~3 km west of Apacilagua, near Orocuina	Río Choluteca	Río Choluteca	Pacific	Honduras	Hon	13.4827	-87.099	P. mexicana	Clade 8a	8	P. mexicana	KP699980	This study	N/A	N/A
191	Poecilia sp.	Ingroup	8916	STRI-NFC 8916	Río Chiquito, trib. to Río Choluteca, just off Carretera N-85 ~3 km west of Apacilagua, near Orocuina	Río Choluteca	Río Choluteca	Pacific	Honduras	Hon	13.4827	-87.099	P. mexicana	Clade 8a	8	P. mexicana	KP699981	This study	N/A	N/A
192	Poecilia sp.	Ingroup	8470	STRI-NFC 8470	Río Camalote 1 km N of Macuelizo near Guatemala-Honduras border	Río Camalote	Río Ulúa	Atlantic	Honduras	Hon	15.3266	-88.6626	P. mexicana	Clade 8a	8	P. mexicana	KP699932	This study	N/A	N/A
193	Poecilia sp.	Ingroup	167960	MLBM 167960	Unnamed trib. to Lago Managua between Estelí and León	Lago Managua	Río San Juan	Atlantic	Nicaragua	N	13.228	-86.5527	P. mexicana	Clade 8a	8	P. mexicana	KP700217	This study	N/A	N/A
194	Poecilia sp.	Ingroup	167962	MLBM 167962	Unnamed trib. to Lago Managua between Estelí and León	Lago Managua	Río San Juan	Atlantic	Nicaragua	N	13.228	-86.5527	P. mexicana	Clade 8a	8	P. mexicana	KP700219	This study	N/A	N/A
195	Poecilia sp.	Ingroup	167964	MLBM 167964	Unnamed trib. to Lago Managua between Estelí and León	Lago Managua	Río San Juan	Atlantic	Nicaragua	N	13.228	-86.5527	P. mexicana	Clade 8a	8	P. mexicana	KP700221	This study	KP700465	This study
196	Poecilia sp.	Ingroup	8873	STRI-NFC 8873	Río Chiquito at Río Nacaome in Nacaome, 200 m downstream from CA 1	Río Nacaome	Río Nacaome	Pacific	Honduras	Hon	13.5417	-87.4788	P. mexicana	Clade 8a	8	P. mexicana	KP699973	This study	N/A	N/A
197	Poecilia sp.	Ingroup	8875	STRI-NFC 8875	Río Chiquito at Río Nacaome in Nacaome, 200 m downstream from CA 1	Río Nacaome	Río Nacaome	Pacific	Honduras	Hon	13.5417	-87.4788	P. mexicana	Clade 8a	8	P. mexicana	KP699974	This study	N/A	N/A
198	Poecilia sp.	Ingroup	8805	STRI-NFC 8805	Río Goascorán ~2.2 km SW of Goascorán and 0.7 km S of El Amatillo	Río Goascorán	Río Goascorán	Pacific	Honduras	Hon	13.5893	-87.7621	P. mexicana	Clade 8a	8	P. mexicana	KP699964	This study	N/A	N/A
199	Poecilia sp.	Ingroup	8815	STRI-NFC 8815	Río Goascorán ~2.2 km SW of Goascorán and 0.7 km S of El Amatillo	Río Goascorán	Río Goascorán	Pacific	Honduras	Hon	13.5893	-87.7621	P. mexicana	Clade 8a	8	P. mexicana	KP699967	This study	N/A	N/A
200	Poecilia sp.	Ingroup	8807	STRI-NFC 8807	Río Goascorán ~2.2 km SW of Goascorán and 0.7 km S of El Amatillo	Río Goascorán	Río Goascorán	Pacific	Honduras	Hon	13.5893	-87.7621	P. mexicana	Clade 8a	8	P. mexicana	KP699966	This study	N/A	N/A
201	Poecilia gillii	Ingroup	1231	STRI-NFC 1231	Río Nosara, approximately 5 km west of CR Rd 150, Nicoya Peninsula	Río Nosara	Río Nosara	Pacific	Costa Rica	CR	10.0483	-85.5452	P. mexicana	Clade 8a	8	P. mexicana	KP699798	This study	N/A	N/A
202	Poecilia gillii	Ingroup	1232	STRI-NFC 1232	Río Nosara, approximately 5 km west of CR Rd 150, Nicoya Peninsula	Río Nosara	Río Nosara	Pacific	Costa Rica	CR	10.0483	-85.5452	P. mexicana	Clade 8a	8	P. mexicana	KP699799	This study	N/A	N/A
203	Poecilia gillii	Ingroup	PG808.01	MLBM 129628	Río Congo at Pan American Hwy (CA 1), ~2.2 km E of Matapalo (drains to Golfo de Nicoya)	Río Congo	Río Barranca	Pacific	Costa Rica	CR	10.24	-84.9917	P. mexicana	Clade 8a	8	P. mexicana	FJ446385	Lee & Johnson (2009)	N/A	N/A
204	Poecilia gillii	Ingroup	PG808.03	MLBM 129630	Río Congo at Pan American Hwy (CA 1), ~2.2 km E of Matapalo (drains to Golfo de Nicoya)	Río Congo	Río Barranca	Pacific	Costa Rica	CR	10.24	-84.9917	P. mexicana	Clade 8a	8	P. mexicana	FJ446387	Lee & Johnson (2009)	N/A	N/A
205	Poecilia sp.	Ingroup	168800	MLBM 168800	Río Diriá at CA1 approx. 2-3 km N of Santa Cruz, Nicoya Peninsula	Río Diriá	Río Diriá	Pacific	Costa Rica	CR	10.2668	-85.5926	P. mexicana	Clade 8a	8	P. mexicana	KP700270	This study	N/A	N/A
206	Poecilia sp.	Ingroup	168805	MLBM 168805	Río Diriá at CA1 approx. 2-3 km N of Santa Cruz, Nicoya Peninsula	Río Diriá	Río Diriá	Pacific	Costa Rica	CR	10.2668	-85.5926	P. mexicana	Clade 8a	8	P. mexicana	KP700275	This study	N/A	N/A
207	Poecilia gillii	Ingroup	2119	STRI-NFC 2119	Río Higueron	Río Higueron	Río Higueron	Pacific	Costa Rica	CR	10.3427	-85.0759	P. mexicana	Clade 8a	8	P. mexicana	KP699816	This study	N/A	N/A
208	Poecilia gillii	Ingroup	1206	STRI-NFC 1206	Río Cañas (trib. to Río Tenorio) appxoimately 2 km southeast of town of Bebedero, ~10 km west of CA1	Río Bebedero	Río Tempisque	Pacific	Costa Rica	CR	10.3483	-85.1688	P. mexicana	Clade 8a	8	P. mexicana	KP699797	This study	KP700419	This study
209	Poecilia sp.	Ingroup	167933	MLBM 167933	Unnamed trib. to Río Tempisque drainage approx. 2 km S of Belén, Nicoya Peninsula	Río Tempisquito	Río Tempisque	Pacific	Costa Rica	CR	10.3908	-85.5905	P. mexicana	Clade 8a	8	P. mexicana	KP700197	This study	N/A	N/A
210	Poecilia sp.	Ingroup	167934	MLBM 167934	Unnamed trib. to Río Tempisque drainage approx. 2 km S of Belén, Nicoya Peninsula	Río Tempisquito	Río Tempisque	Pacific	Costa Rica	CR	10.3908	-85.5905	P. mexicana	Clade 8a	8	P. mexicana	KP700198	This study	N/A	N/A
211	Poecilia gillii	Ingroup	PG723.01	MLBM 235211	Río Carrisal	Río Tempisque	Río Tempisque	Pacific	Costa Rica	CR	10.395	-85.5869	P. mexicana	Clade 8a	8	P. mexicana	FJ446332	Lee & Johnson (2009)	N/A	N/A
212	Poecilia gillii	Ingroup	PG612.03	MLBM 119012	Río Chiquito, trib. to Lake Arenal	Río San Carlos	Río San Juan	Atlantic	Costa Rica	CR	10.4377	-84.8681	P. mexicana	Clade 8a	8	P. mexicana	FJ446195	Lee & Johnson (2009)	N/A	N/A
213	Poecilia gillii	Ingroup	PG612.04	MLBM 235354	Río Chiquito, trib. to Lake Arenal	Río San Carlos	Río San Juan	Atlantic	Costa Rica	CR	10.4377	-84.8681	P. mexicana	Clade 8a	8	P. mexicana	FJ446196	Lee & Johnson (2009)	N/A	N/A
214	Poecilia gillii	Ingroup	PG614.01	MLBM 118868	Río Santa Rosa	Río Bebedero	Río Tempisque	Pacific	Costa Rica	CR	10.4611	-85.0744	P. mexicana	Clade 8a	8	P. mexicana	FJ446198	Lee & Johnson (2009)	N/A	N/A
215	Poecilia gillii	Ingroup	PG616.01	MLBM 118869	Río Magdalena	Río Bebedero	Río Tempisque	Pacific	Costa Rica	CR	10.4794	-85.0781	P. mexicana	Clade 8a	8	P. mexicana	FJ446200	Lee & Johnson (2009)	N/A	N/A
216	Poecilia gillii	Ingroup	PG616.02	MLBM 118870	Río Magdalena	Río Bebedero	Río Tempisque	Pacific	Costa Rica	CR	10.4794	-85.0781	P. mexicana	Clade 8a	8	P. mexicana	FJ446201	Lee & Johnson (2009)	N/A	N/A
217	Poecilia gillii	Ingroup	PG616.03	MLBM 119014	Río Magdalena	Río Bebedero	Río Tempisque	Pacific	Costa Rica	CR	10.4794	-85.0781	P. mexicana	Clade 8a	8	P. mexicana	FJ446202	Lee & Johnson (2009)	N/A	N/A
218	Poecilia sp.	Ingroup	168697	MLBM 168697	Río Cabuyo at unnamed province Rd to la Reserva Biologica Lomas Bardudal	Río Cabuyo	Río Tempisque	Pacific	Costa Rica	CR	10.4896	-85.3855	P. mexicana	Clade 8a	8	P. mexicana	KP700254	This study	N/A	N/A
219	Poecilia sp.	Ingroup	168700	MLBM 168700	Río Cabuyo at unnamed province Rd to la Reserva Biologica Lomas Bardudal	Río Cabuyo	Río Tempisque	Pacific	Costa Rica	CR	10.4896	-85.3855	P. mexicana	Clade 8a	8	P. mexicana	KP700257	This study	N/A	N/A
220	Poecilia sp.	Ingroup	168701	MLBM 168701	Río Cabuyo at unnamed province Rd to la Reserva Biologica Lomas Bardudal	Río Cabuyo	Río Tempisque	Pacific	Costa Rica	CR	10.4896	-85.3855	P. mexicana	Clade 8a	8	P. mexicana	KP700258	This study	N/A	N/A
221	Poecilia sp.	Ingroup	168702	MLBM 168702	Río Cabuyo at unnamed province Rd to la Reserva Biologica Lomas Bardudal	Río Cabuyo	Río Tempisque	Pacific	Costa Rica	CR	10.4896	-85.3855	P. mexicana	Clade 8a	8	P. mexicana	KP700259	This study	N/A	N/A
222	Poecilia sp.	Ingroup	167898	MLBM 167898	Río Sardinal at Sardinal, on Rd 151 approx. 5 km from 21	Río Sardinal	Río Tempisque	Pacific	Costa Rica	CR	10.5151	-85.6517	P. mexicana	Clade 8a	8	P. mexicana	KP700180	This study	N/A	N/A
223	Poecilia sp.	Ingroup	167899	MLBM 167899	Río Sardinal at Sardinal, on Rd 151 approx. 5 km from 21	Río Sardinal	Río Tempisque	Pacific	Costa Rica	CR	10.5151	-85.6517	P. mexicana	Clade 8a	8	P. mexicana	KP700181	This study	N/A	N/A
224	Poecilia sp.	Ingroup	167900	MLBM 167900	Río Sardinal at Sardinal, on Rd 151 approx. 5 km from 21	Río Sardinal	Río Tempisque	Pacific	Costa Rica	CR	10.5151	-85.6517	P. mexicana	Clade 8a	8	P. mexicana	KP700182	This study	N/A	N/A
225	Poecilia sp.	Ingroup	167904	MLBM 167904	Río Salto at CA1 SE of Liberia, Nicoya Peninsula	Río Salto	Río Tempisque	Pacific	Costa Rica	CR	10.5611	-85.3919	P. mexicana	Clade 8a	8	P. mexicana	KP700185	This study	N/A	N/A
226	Poecilia sp.	Ingroup	167905	MLBM 167905	Río Salto at CA1 SE of Liberia, Nicoya Peninsula	Río Salto	Río Tempisque	Pacific	Costa Rica	CR	10.5611	-85.3919	P. mexicana	Clade 8a	8	P. mexicana	KP700186	This study	N/A	N/A
227	Poecilia sp.	Ingroup	167908	MLBM 167908	Río Salto at CA1 SE of Liberia, Nicoya Peninsula	Río Salto	Río Tempisque	Pacific	Costa Rica	CR	10.5611	-85.3919	P. mexicana	Clade 8a	8	P. mexicana	KP700188	This study	N/A	N/A
228	Poecilia sp.	Ingroup	167909	MLBM 167909	Río Salto at CA1 SE of Liberia, Nicoya Peninsula	Río Salto	Río Tempisque	Pacific	Costa Rica	CR	10.5611	-85.3919	P. mexicana	Clade 8a	8	P. mexicana	KP700189	This study	N/A	N/A
229	Poecilia sp.	Ingroup	167910	MLBM 167910	Río Salto at CA1 SE of Liberia, Nicoya Peninsula	Río Salto	Río Tempisque	Pacific	Costa Rica	CR	10.5611	-85.3919	P. mexicana	Clade 8a	8	P. mexicana	KP700190	This study	N/A	N/A
230	Poecilia gillii	Ingroup	PG808.04	MLBM 129631	Río Congo at Pan American Hwy (CA 1), ~2.2 km E of Matapalo (drains to Golfo de Nicoya)	Río Congo	Río Barranca	Pacific	Costa Rica	CR	10.24	-84.9917	P. mexicana	Clade 8a	8	P. mexicana	FJ446388	Lee & Johnson (2009)	N/A	N/A
231	Poecilia gillii	Ingroup	PG808.05	MLBM 129632	Río Congo at Pan American Hwy (CA 1), ~2.2 km E of Matapalo (drains to Golfo de Nicoya)	Río Congo	Río Barranca	Pacific	Costa Rica	CR	10.24	-84.9917	P. mexicana	Clade 8a	8	P. mexicana	FJ446389	Lee & Johnson (2009)	N/A	N/A
232	Poecilia gillii	Ingroup	PG808.06	MLBM 129633	Río Congo at Pan American Hwy (CA 1), ~2.2 km E of Matapalo (drains to Golfo de Nicoya)	Río Congo	Río Barranca	Pacific	Costa Rica	CR	10.24	-84.9917	P. mexicana	Clade 8a	8	P. mexicana	FJ446390	Lee & Johnson (2009)	N/A	N/A
233	Poecilia gillii	Ingroup	PG617.03	MLBM 234740	Río Javilla, trib. to Río Cañas	Río Cañas	Río Tempisque	Pacific	Costa Rica	CR	10.3721	-85.0974	P. mexicana	Clade 8a	8	P. mexicana	FJ446205	Lee & Johnson (2009)	N/A	N/A
234	Poecilia sp.	Ingroup	167902	MLBM 167902	Río Sardinal at Sardinal, on Rd 151 approx. 5 km from 21	Río Sardinal	Río Tempisque	Pacific	Costa Rica	CR	10.5151	-85.6517	P. mexicana	Clade 8a	8	P. mexicana	KP700184	This study	N/A	N/A
235	Poecilia sp.	Ingroup	167906	MLBM 167906	Río Salto at CA1 SE of Liberia, Nicoya Peninsula	Río Salto	Río Tempisque	Pacific	Costa Rica	CR	10.5611	-85.3919	P. mexicana	Clade 8a	8	P. mexicana	KP700187	This study	N/A	N/A
236	Poecilia gillii	Ingroup	PG611.05	MLBM 235129	Quebrada Homiguera, trib. to Río Tenorio	Río Bebedero	Río Tempisque	Pacific	Costa Rica	CR	10.6909	-85.0837	P. mexicana	Clade 8a	8	P. mexicana	FJ446192	Lee & Johnson (2009)	N/A	N/A
237	Poecilia gillii	Ingroup	PG804.02	MLBM 129608	Río Tarcoles at CR Rd 137, W of San Juan de Mata (El Llano)	Río Tarcoles	Río Grande de Tarcoles	Pacific	Costa Rica	CR	9.8798	-84.5278	P. mexicana	Clade 8a	8	P. mexicana	FJ446370	Lee & Johnson (2009)	N/A	N/A
238	Poecilia gillii	Ingroup	PG801.01	MLBM 129602	Río Pacacua	Río Tarcoles	Río Grande de Tarcoles	Pacific	Costa Rica	CR	9.9196	-84.2413	P. mexicana	Clade 8a	8	P. mexicana	FJ446364	Lee & Johnson (2009)	N/A	N/A
239	Poecilia gillii	Ingroup	PG801.02	MLBM 129603	Río Pacacua	Río Tarcoles	Río Grande de Tarcoles	Pacific	Costa Rica	CR	9.9196	-84.2413	P. mexicana	Clade 8a	8	P. mexicana	FJ446365	Lee & Johnson (2009)	N/A	N/A
240	Poecilia gillii	Ingroup	PG801.03	MLBM 129604	Río Pacacua	Río Tarcoles	Río Grande de Tarcoles	Pacific	Costa Rica	CR	9.9196	-84.2413	P. mexicana	Clade 8a	8	P. mexicana	FJ446366	Lee & Johnson (2009)	N/A	N/A
241	Poecilia gillii	Ingroup	PG801.04	MLBM 129605	Río Pacacua	Río Tarcoles	Río Grande de Tarcoles	Pacific	Costa Rica	CR	9.9196	-84.2413	P. mexicana	Clade 8a	8	P. mexicana	FJ446367	Lee & Johnson (2009)	N/A	N/A
242	Poecilia gillii	Ingroup	PG801.05	MLBM 129606	Río Pacacua	Río Tarcoles	Río Grande de Tarcoles	Pacific	Costa Rica	CR	9.9196	-84.2413	P. mexicana	Clade 8a	8	P. mexicana	FJ446368	Lee & Johnson (2009)	N/A	N/A
243	Poecilia gillii	Ingroup	PG809.05	MLBM 129617	Río Rosales	Río Tarcoles	Río Grande de Tarcoles	Pacific	Costa Rica	CR	10.0298	-84.3258	P. mexicana	Clade 8a	8	P. mexicana	FJ446395	Lee & Johnson (2009)	N/A	N/A
244	Poecilia gillii	Ingroup	PG804.03	MLBM 129609	Río Tarcoles at CR Rd 137, W of San Juan de Mata (El Llano)	Río Tarcoles	Río Grande de Tarcoles	Pacific	Costa Rica	CR	9.8798	-84.5278	P. mexicana	Clade 8a	8	P. mexicana	FJ446371	Lee & Johnson (2009)	N/A	N/A
245	Poecilia gillii	Ingroup	18589	STRI-NFC 18589	Río Anton in Anton Valley	Río Anton	Río Anton	Pacific	Panama	Pan	8.59719	-80.1377	P. mexicana	Clade 8a	8	P. mexicana	KP700155	This study	N/A	N/A
246	Poecilia gillii	Ingroup	9773	STRI-NFC 9773	Río San Juan at Coclecito	Río Cocle del Norte	Río Cocle del Norte	Atlantic	Panama	Pan	8.80417	-80.5808	P. mexicana	Clade 8a	8	P. mexicana	KP699987	This study	KP700446	This study
247	Poecilia gillii	Ingroup	9776	STRI-NFC 9776	Río San Juan at Coclecito	Río Cocle del Norte	Río Cocle del Norte	Atlantic	Panama	Pan	8.80417	-80.5808	P. mexicana	Clade 8a	8	P. mexicana	KP699989	This study	N/A	N/A
248	Poecilia gillii	Ingroup	7363	STRI-NFC 7363	Quebrada Mandingo, Río Grande	Río Grande	Río Grande	Pacific	Panama	Pan	9.0253	-79.6989	P. mexicana	Clade 8a	8	P. mexicana	KP699863	This study	N/A	N/A
249	Poecilia gillii	Ingroup	7364	STRI-NFC 7364	Quebrada Mandingo, Río Grande	Río Grande	Río Grande	Pacific	Panama	Pan	9.0253	-79.6989	P. mexicana	Clade 8a	8	P. mexicana	KP699864	This study	N/A	N/A
250	Poecilia gillii	Ingroup	8343	STRI-NFC 8343	Río Ulúa at Ulúa / Cucuyagua	Río Ulúa	Río Ulúa	Atlantic	Honduras	Hon	14.651	-88.8814	P. mexicana	Clade 8a	8	P. mexicana	KP699911	This study	N/A	N/A
251	Poecilia gillii	Ingroup	8356	STRI-NFC 8356	Río Ulúa at Ulúa / Cucuyagua	Río Ulúa	Río Ulúa	Atlantic	Honduras	Hon	14.651	-88.8814	P. mexicana	Clade 8a	8	P. mexicana	KP699915	This study	N/A	N/A
252	Poecilia sp.	Ingroup	8362	STRI-NFC 8362	Río Tio Higuito, trib. to Río Motagua, at cuenca near Higuito	Río Motagua	Río Motagua	Atlantic	Honduras	Hon	14.8394	-89.1682	P. mexicana	Clade 8a	8	P. mexicana	KP699918	This study	N/A	N/A
253	Poecilia sp.	Ingroup	8363	STRI-NFC 8363	Río Tio Higuito, trib. to Río Motagua, at cuenca near Higuito	Río Motagua	Río Motagua	Atlantic	Honduras	Hon	14.8394	-89.1682	P. mexicana	Clade 8a	8	P. mexicana	KP699919	This study	N/A	N/A
254	Poecilia gillii	Ingroup	8364	STRI-NFC 8364	Río Tio Higuito, trib. to Río Motagua, at cuenca near Higuito	Río Motagua	Río Motagua	Atlantic	Honduras	Hon	14.8394	-89.1682	P. mexicana	Clade 8a	8	P. mexicana	KP699920	This study	N/A	N/A
255	Poecilia gillii	Ingroup	6886	STRI-NFC 6886	Río Calovebora main stem	Río Calovebora	Río Calovebora	Atlantic	Panama	Pan	8.74778	-81.2231	P. mexicana	Clade 8a	8	P. mexicana	KP699859	This study	N/A	N/A
256	Poecilia gillii	Ingroup	9780	STRI-NFC 9780	Río Moreno (road to Coclesito)	Río Cocle del Norte	Río Cocle del Norte	Atlantic	Panama	Pan	8.7745	-80.5278	P. mexicana	Clade 8a	8	P. mexicana	KP699990	This study	N/A	N/A
257	Poecilia gillii	Ingroup	15330	STRI-NFC 15330	Unnamed trib.	Río Cocle del Norte	Río Cocle del Norte	Atlantic	Panama	Pan	8.80464	-80.5333	P. mexicana	Clade 8a	8	P. mexicana	KP700084	This study	N/A	N/A
258	Poecilia gillii	Ingroup	15331	STRI-NFC 15331	Unnamed trib.	Río Cocle del Norte	Río Cocle del Norte	Atlantic	Panama	Pan	8.80464	-80.5333	P. mexicana	Clade 8a	8	P. mexicana	KP700085	This study	N/A	N/A
259	Poecilia gillii	Ingroup	16498	STRI-NFC 16498	Río Botija	Río Cocle del Norte	Río Cocle del Norte	Atlantic	Panama	Pan	8.812	-80.5797	P. mexicana	Clade 8a	8	P. mexicana	KP700124	This study	KP700456	This study
260	Poecilia gillii	Ingroup	16536	STRI-NFC 16536	Unnamed trib.	Río Cocle del Norte	Río Cocle del Norte	Atlantic	Panama	Pan	8.82147	-80.5336	P. mexicana	Clade 8a	8	P. mexicana	KP700126	This study	N/A	N/A
261	Poecilia gillii	Ingroup	16679	STRI-NFC 16679	Río Toabre at Quebrada Patatilla	Río Cocle del Norte	Río Cocle del Norte	Atlantic	Panama	Pan	8.91533	-80.5007	P. mexicana	Clade 8a	8	P. mexicana	KP700131	This study	N/A	N/A
262	Poecilia gillii	Ingroup	15409	STRI-NFC 15409	Río Victoria	Río Cocle del Norte	Río Cocle del Norte	Atlantic	Panama	Pan	8.925	-80.5514	P. mexicana	Clade 8a	8	P. mexicana	KP700087	This study	N/A	N/A
263	Poecilia gillii	Ingroup	16562	STRI-NFC 16562	Río Victoria	Río Cocle del Norte	Río Cocle del Norte	Atlantic	Panama	Pan	8.92514	-80.5517	P. mexicana	Clade 8a	8	P. mexicana	KP700127	This study	N/A	N/A
264	Poecilia gillii	Ingroup	112	STRI-NFC 112	Río Chiriqui Viejo	Río Chiriqui Viejo	Río Chiriqui Viejo	Pacific	Panama	Pan	8.76443	-82.8271	P. mexicana	Clade 8a	8	P. mexicana	KP699789	This study	N/A	N/A
265	Poecilia gillii	Ingroup	16479	STRI-NFC 16479	Río Moreno	Río Moreno	Río Cocle del Norte	Atlantic	Panama	Pan	8.76667	-80.5361	P. mexicana	Clade 8a	8	P. mexicana	KP700121	This study	N/A	N/A
266	Poecilia gillii	Ingroup	16483	STRI-NFC 16483	Río Moreno	Río Moreno	Río Cocle del Norte	Atlantic	Panama	Pan	8.76667	-80.5361	P. mexicana	Clade 8a	8	P. mexicana	KP700122	This study	N/A	N/A
267	Poecilia gillii	Ingroup	15319	STRI-NFC 15319	Río Moreno	Río Moreno	Río Cocle del Norte	Atlantic	Panama	Pan	8.77942	-80.5345	P. mexicana	Clade 8a	8	P. mexicana	KP700083	This study	N/A	N/A
268	Poecilia gillii	Ingroup	9768	STRI-NFC 9768	Río San Juan at Coclecito	Río San Juan (Pan)	Río Cocle del Norte	Atlantic	Panama	Pan	8.80417	-80.5808	P. mexicana	Clade 8a	8	P. mexicana	KP699986	This study	N/A	N/A
269	Poecilia gillii	Ingroup	9774	STRI-NFC 9774	Río San Juan at Coclecito	Río San Juan (Pan)	Río Cocle del Norte	Atlantic	Panama	Pan	8.80417	-80.5808	P. mexicana	Clade 8a	8	P. mexicana	KP699988	This study	N/A	N/A
270	Poecilia gillii	Ingroup	16497	STRI-NFC 16497	Río Botija	Río Botija	Río Cocle del Norte	Atlantic	Panama	Pan	8.812	-80.5797	P. mexicana	Clade 8a	8	P. mexicana	KP700123	This study	N/A	N/A
271	Poecilia gillii	Ingroup	1347	STRI-NFC 1347	Río Cocle del Norte	Río Cocle del Norte	Río Cocle del Norte	Atlantic	Panama	Pan	8.81867	-80.553	P. mexicana	Clade 8a	8	P. mexicana	KP699807	This study	N/A	N/A
272	Poecilia gillii	Ingroup	16529	STRI-NFC 16529	Río Cocle del Norte	Río Cocle del Norte	Río Cocle del Norte	Atlantic	Panama	Pan	8.82147	-80.5336	P. mexicana	Clade 8a	8	P. mexicana	KP700125	This study	N/A	N/A
273	Poecilia gillii	Ingroup	16686	STRI-NFC 16686	Río Toabre at Quebrada Patatilla	Río Toabré	Río Cocle del Norte	Atlantic	Panama	Pan	8.91533	-80.5007	P. mexicana	Clade 8a	8	P. mexicana	KP700132	This study	N/A	N/A
274	Poecilia gillii	Ingroup	16131	STRI-NFC 16131	Quebrada Los Uveros	Río Indio	Río Indio	Atlantic	Panama	Pan	8.94719	-80.1382	P. mexicana	Clade 8a	8	P. mexicana	KP700103	This study	N/A	N/A
275	Poecilia gillii	Ingroup	16615	STRI-NFC 16615	Río La Jacinta	Río La Jacinta	Río Cocle del Norte	Atlantic	Panama	Pan	8.96864	-80.5295	P. mexicana	Clade 8a	8	P. mexicana	KP700129	This study	N/A	N/A
276	Poecilia gillii	Ingroup	16616	STRI-NFC 16616	Río La Jacinta	Río La Jacinta	Río Cocle del Norte	Atlantic	Panama	Pan	8.96864	-80.5295	P. mexicana	Clade 8a	8	P. mexicana	KP700130	This study	N/A	N/A
277	Poecilia gillii	Ingroup	10048	STRI-NFC 10048	Quebrada La Candelaria; Río Jobo, Río Indio de Anton	Río Indio	Río Indio	Atlantic	Panama	Pan	9.13011	-80.1715	P. mexicana	Clade 8a	8	P. mexicana	KP699993	This study	N/A	N/A
278	Poecilia gillii	Ingroup	8357	STRI-NFC 8357	Río Ulúa at Ulúa / Cucuyagua	Río Ulúa	Río Ulúa	Atlantic	Honduras	Hon	14.651	-88.8814	P. mexicana	Clade 8a	8	P. mexicana	KP699916	This study	N/A	N/A
279	Poecilia gillii	Ingroup	16695	STRI-NFC 16695	Río Toabre at Quebrada Tortuguita	Río Toabré	Río Cocle del Norte	Atlantic	Panama	Pan	8.87861	-80.3905	P. mexicana	Clade 8a	8	P. mexicana	KP700133	This study	N/A	N/A
280	Poecilia gillii	Ingroup	16718	STRI-NFC 16718	Río Toabre at Quebrada Tortuguita	Río Toabré	Río Cocle del Norte	Atlantic	Panama	Pan	8.87861	-80.3905	P. mexicana	Clade 8a	8	P. mexicana	KP700134	This study	N/A	N/A
281	Poecilia gillii	Ingroup	15532	STRI-NFC 15532	Quebrada Platanal	Quebrada Platanal	Río Miguel de la Borda	Atlantic	Panama	Pan	8.87989	-80.2769	P. mexicana	Clade 8a	8	P. mexicana	KP700092	This study	N/A	N/A
282	Poecilia gillii	Ingroup	16094	STRI-NFC 16094	Río Uracillo	Río Uracillo	Río Indio	Atlantic	Panama	Pan	8.88086	-80.2198	P. mexicana	Clade 8a	8	P. mexicana	KP700100	This study	KP700453	This study
283	Poecilia gillii	Ingroup	16096	STRI-NFC 16096	Río Uracillo	Río Uracillo	Río Indio	Atlantic	Panama	Pan	8.88086	-80.2198	P. mexicana	Clade 8a	8	P. mexicana	KP700101	This study	N/A	N/A
284	Poecilia gillii	Ingroup	15365	STRI-NFC 15365	Río Toabré	Río Toabré	Río Cocle del Norte	Atlantic	Panama	Pan	8.91544	-80.5006	P. mexicana	Clade 8a	8	P. mexicana	KP700086	This study	N/A	N/A
285	Poecilia gillii	Ingroup	16578	STRI-NFC 16578	Río Victoria	Río Victoria	Río Cocle del Norte	Atlantic	Panama	Pan	8.92514	-80.5517	P. mexicana	Clade 8a	8	P. mexicana	KP700128	This study	N/A	N/A
286	Poecilia gillii	Ingroup	736	STRI-NFC 736	Río Canaveral just S of Laguna Samani	Río Canaveral	Río Canaveral	Atlantic	Panama	Pan	8.92858	-81.7118	P. mexicana	Clade 8a	8	P. mexicana	KP699791	This study	N/A	N/A
287	Poecilia gillii	Ingroup	6826	STRI-NFC 6826	Escudo de Veraguas-South side, Bocas del Toro	Escudo de Veraguas	Laguna de Chiriqui	Atlantic	Panama	Pan	9.10222	-81.5617	P. mexicana	Clade 8a	8	P. mexicana	KP699855	This study	KP700430	This study
288	Poecilia gillii	Ingroup	9030	STRI-NFC 9030	Quebrada San Juan at Cuango	Río Cuango	Río Cuango	Atlantic	Panama	Pan	9.5508	-79.3092	P. mexicana	Clade 8a	8	P. mexicana	KP699984	This study	N/A	N/A
289	Poecilia gillii	Ingroup	8344	STRI-NFC 8344	Río Ulúa at Ulúa / Cucuyagua	Río Ulúa	Río Ulúa	Atlantic	Honduras	Hon	14.651	-88.8814	P. mexicana	Clade 8a	8	P. mexicana	KP699912	This study	N/A	N/A
290	Poecilia sp.	Ingroup	8858	STRI-NFC 8858	Río Goascorán at Caridad	Río Goascorán	Río Goascorán	Pacific	Honduras	Hon	13.8277	-87.6948	P. mexicana	Clade 8a	8	P. mexicana	KP699969	This study	N/A	N/A
291	Poecilia sp.	Ingroup	8860	STRI-NFC 8860	Río Goascorán at Caridad	Río Goascorán	Río Goascorán	Pacific	Honduras	Hon	13.8277	-87.6948	P. mexicana	Clade 8a	8	P. mexicana	KP699971	This study	N/A	N/A
292	Poecilia sp.	Ingroup	8372	STRI-NFC 8372	Río El Sauce (Amarillo), Copan Ruinas at cc. Motagua	Río El Sauce	Río Motagua	Atlantic	Honduras	Hon	14.8559	-89.1235	P. mexicana	Clade 8b	8	P. mexicana	KP699922	This study	N/A	N/A
293	Poecilia sp.	Ingroup	8373	STRI-NFC 8373	Río El Sauce (Amarillo), Copan Ruinas at cc. Motagua	Río El Sauce	Río Motagua	Atlantic	Honduras	Hon	14.8559	-89.1235	P. mexicana	Clade 8b	8	P. mexicana	KP699923	This study	N/A	N/A
294	Poecilia sp.	Ingroup	8374	STRI-NFC 8374	Río El Sauce (Amarillo), Copan Ruinas at cc. Motagua	Río El Sauce	Río Motagua	Atlantic	Honduras	Hon	14.8559	-89.1235	P. mexicana	Clade 8b	8	P. mexicana	KP699924	This study	N/A	N/A
295	Poecilia sp.	Ingroup	8232	STRI-NFC 8232	Río Lobo at Motagua	Río Lobo	Río Motagua	Atlantic	Guatemala	Guat	15.1816	-89.2994	P. mexicana	Clade 8b	8	P. mexicana	KP699898	This study	N/A	N/A
296	Poecilia sp.	Ingroup	8241	STRI-NFC 8241	Río Dona Maria at Motagua	Río Dona Maria	Río Motagua	Atlantic	Guatemala	Guat	15.2091	-89.2481	P. mexicana	Clade 8b	8	P. mexicana	KP699899	This study	N/A	N/A
297	Poecilia sp.	Ingroup	8222	STRI-NFC 8222	Río Lobo at Motagua	Río Lobo	Río Motagua	Atlantic	Guatemala	Guat	15.1816	-89.2994	P. mexicana	Clade 8b	8	P. mexicana	KP699896	This study	N/A	N/A
298	Poecilia sp.	Ingroup	8230	STRI-NFC 8230	Río Lobo at Motagua	Río Lobo	Río Motagua	Atlantic	Guatemala	Guat	15.1816	-89.2994	P. mexicana	Clade 8b	8	P. mexicana	KP699897	This study	N/A	N/A
299	Poecilia sp.	Ingroup	8245	STRI-NFC 8245	Río Dona Maria at Motagua	Río Dona Maria	Río Motagua	Atlantic	Guatemala	Guat	15.2091	-89.2481	P. mexicana	Clade 8b	8	P. mexicana	KP699900	This study	N/A	N/A
300	Poecilia sp.	Ingroup	8246	STRI-NFC 8246	Río Dona Maria at Motagua	Río Dona Maria	Río Motagua	Atlantic	Guatemala	Guat	15.2091	-89.2481	P. mexicana	Clade 8b	8	P. mexicana	KP699901	This study	N/A	N/A
301	Poecilia sp.	Ingroup	8248	STRI-NFC 8248	Río Dona Maria at Motagua	Río Dona Maria	Río Motagua	Atlantic	Guatemala	Guat	15.2091	-89.2481	P. mexicana	Clade 8b	8	P. mexicana	KP699902	This study	N/A	N/A
302	Poecilia gillii	Ingroup	PG701.05	MLBM 235368	Trib. to Río Reventazon at Rd. 232 across from Angostura Lagoon	Río Reventazon	Río Reventazon	Atlantic	Costa Rica	CR	9.8723	-83.6332	P. mexicana	Clade 8b	8	P. mexicana	FJ446211	Lee & Johnson (2009)	KP700503	This study
303	Poecilia sp.	Ingroup	8311	STRI-NFC 8311	Río Lempa at Lempa / Nueva Ocotepeque	Río Lempa	Río Lempa	Pacific	Honduras	Hon	14.3942	-89.2082	P. mexicana	Clade 8b	8	P. mexicana	KP699907	This study	N/A	N/A
304	Poecilia sp.	Ingroup	8316	STRI-NFC 8316	Río Lempa at Lempa / Nueva Ocotepeque	Río Lempa	Río Lempa	Pacific	Honduras	Hon	14.3942	-89.2082	P. mexicana	Clade 8b	8	P. mexicana	KP699910	This study	N/A	N/A
305	Poecilia mexicana	Ingroup	8607	STRI-NFC 8607	Río Medina, trib. to Río Aguan, at Coyoles Centrales	Río Medina	Río Aguan	Atlantic	Honduras	Hon	15.4838	-86.666	P. mexicana	Clade 8c	8	P. mexicana	KP699942	This study	KP700439	This study
306	Poecilia sp.	Ingroup	8534	STRI-NFC 8534	Quebrada De Chicho between Comunidades de Achiote and Cholomena at A	Quebrada de Chico	Río Aguan	Atlantic	Honduras	Hon	15.5348	-86.2117	P. mexicana	Clade 8c	8	P. mexicana	KP699937	This study	N/A	N/A
307	Poecilia sp.	Ingroup	8541	STRI-NFC 8541	Quebrada De Chicho between Comunidades de Achiote and Cholomena at A	Quebrada de Chico	Río Aguan	Atlantic	Honduras	Hon	15.5348	-86.2117	P. mexicana	Clade 8c	8	P. mexicana	KP699938	This study	N/A	N/A
308	Poecilia sp.	Ingroup	8558	STRI-NFC 8558	Río Taujica at Taujica	Río Taujica	Río Aguan	Atlantic	Honduras	Hon	15.681	-85.9393	P. mexicana	Clade 8c	8	P. mexicana	KP699939	This study	N/A	N/A
309	Poecilia sp.	Ingroup	8565	STRI-NFC 8565	Río Taujica at Taujica	Río Taujica	Río Aguan	Atlantic	Honduras	Hon	15.681	-85.9393	P. mexicana	Clade 8c	8	P. mexicana	KP699940	This study	N/A	N/A
310	Poecilia sphenops	Ingroup	4303	STRI-NFC 4303	Río Agua Buena	Río Agua Buena	Río Agua Buena	Atlantic	Honduras	Hon	15.7661	-86.9989	P. mexicana	Clade 8c	8	P. mexicana	KP699839	This study	N/A	N/A
311	Poecilia sp.	Ingroup	8637	STRI-NFC 8637	Río Humuya at Ulúa / Comayagua	Río Humuya	Río Ulúa	Atlantic	Honduras	Hon	14.4537	-87.6523	P. mexicana	Clade 8c	8	P. mexicana	KP699948	This study	N/A	N/A
312	Poecilia mexicana	Ingroup	8618	STRI-NFC 8618	Río Yojoa at Ulúa	Río Yojoa	Río Ulúa	Atlantic	Honduras	Hon	15.0348	-87.9287	P. mexicana	Clade 8c	8	P. mexicana	KP699943	This study	N/A	N/A
313	Poecilia mexicana	Ingroup	8620	STRI-NFC 8620	Río Yojoa at Ulúa	Río Yojoa	Río Ulúa	Atlantic	Honduras	Hon	15.0348	-87.9287	P. mexicana	Clade 8c	8	P. mexicana	KP699945	This study	N/A	N/A
314	Poecilia sp.	Ingroup	8463	STRI-NFC 8463	Río El Sauce (Amarillo) / Santa Rita	Río El Sauce	Río Motagua	Atlantic	Honduras	Hon	14.866	-89.0678	P. mexicana	Clade 8c	8	P. mexicana	KP699929	This study	N/A	N/A
315	Poecilia sp.	Ingroup	8465	STRI-NFC 8465	Río El Sauce (Amarillo) / Santa Rita	Río El Sauce	Río Motagua	Atlantic	Honduras	Hon	14.866	-89.0678	P. mexicana	Clade 8c	8	P. mexicana	KP699930	This study	N/A	N/A
316	Poecilia sp.	Ingroup	8466	STRI-NFC 8466	Río El Sauce (Amarillo) / Santa Rita	Río El Sauce	Río Motagua	Atlantic	Honduras	Hon	14.866	-89.0678	P. mexicana	Clade 8c	8	P. mexicana	KP699931	This study	N/A	N/A
317	Poecilia mexicana	Ingroup	8619	STRI-NFC 8619	Río Yojoa at Ulúa	Río Yojoa	Río Ulúa	Atlantic	Honduras	Hon	15.0348	-87.9287	P. mexicana	Clade 8c	8	P. mexicana	KP699944	This study	N/A	N/A
318	Poecilia sp.	Ingroup	8471	STRI-NFC 8471	Río Camalote 1 km N of Macuelizo near Guatemala-Honduras border	Río Camalote	Río Ulúa	Atlantic	Honduras	Hon	15.3266	-88.6626	P. mexicana	Clade 8c	8	P. mexicana	KP699933	This study	N/A	N/A
319	Poecilia sp.	Ingroup	8408	STRI-NFC 8408	Río Naco at Ulúa	Río Naco	Río Ulúa	Atlantic	Honduras	Hon	15.3415	-88.6248	P. mexicana	Clade 8c	8	P. mexicana	KP699926	This study	N/A	N/A
320	Poecilia sp.	Ingroup	8411	STRI-NFC 8411	Río Naco at Ulúa	Río Naco	Río Ulúa	Atlantic	Honduras	Hon	15.3415	-88.6248	P. mexicana	Clade 8c	8	P. mexicana	KP699928	This study	N/A	N/A
321	Poecilia sp.	Ingroup	8181	STRI-NFC 8181	Río Amatillo at Lago Izabal near Venta de El Amatillo	Río Amatillo	Río Polochic	Atlantic	Guatemala	Guat	15.5391	-88.8983	P. mexicana	Clade 8c	8	P. mexicana	KP699892	This study	N/A	N/A
322	Poecilia sp.	Ingroup	8184	STRI-NFC 8184	Río Amatillo at Lago Izabal near Venta de El Amatillo	Río Amatillo	Río Polochic	Atlantic	Guatemala	Guat	15.5391	-88.8983	P. mexicana	Clade 8c	8	P. mexicana	KP699893	This study	KP700431	This study
323	Poecilia sp.	Ingroup	8185	STRI-NFC 8185	Río Amatillo at Lago Izabal near Venta de El Amatillo	Río Amatillo	Río Polochic	Atlantic	Guatemala	Guat	15.5391	-88.8983	P. mexicana	Clade 8c	8	P. mexicana	KP699894	This study	N/A	N/A
324	Poecilia sp.	Ingroup	8186	STRI-NFC 8186	Río Amatillo at Lago Izabal near Venta de El Amatillo	Río Amatillo	Río Polochic	Atlantic	Guatemala	Guat	15.5391	-88.8983	P. mexicana	Clade 8c	8	P. mexicana	KP699895	This study	N/A	N/A
325	Poecilia sp.	Ingroup	8288	STRI-NFC 8288	Río Chaguacal, trib. to Río Polochic	Río Chaguacal	Río Polochic	Atlantic	Guatemala	Guat	15.3162	-89.8556	P. mexicana	Clade 8c	8	P. mexicana	KP699903	This study	KP700432	This study
326	Poecilia sp.	Ingroup	8289	STRI-NFC 8289	Río Chaguacal, trib. to Río Polochic	Río Chaguacal	Río Polochic	Atlantic	Guatemala	Guat	15.3162	-89.8556	P. mexicana	Clade 8c	8	P. mexicana	KP699904	This study	KP700433	This study
327	Poecilia sp.	Ingroup	8290	STRI-NFC 8290	Río Chaguacal, trib. to Río Polochic	Río Chaguacal	Río Polochic	Atlantic	Guatemala	Guat	15.3162	-89.8556	P. mexicana	Clade 8c	8	P. mexicana	KP699905	This study	KP700434	This study
328	Poecilia sp.	Ingroup	8294	STRI-NFC 8294	Río Chaguacal, trib. to Río Polochic	Río Chaguacal	Río Polochic	Atlantic	Guatemala	Guat	15.3162	-89.8556	P. mexicana	Clade 8c	8	P. mexicana	KP699906	This study	KP700435	This study
329	Poecilia sp.	Ingroup	7906	STRI-NFC 7906	Río Sebol at Finca Sebol	Río Sebol	Río Usumacinta	Atlantic	Guatemala	Guat	15.8063	-89.9448	P. mexicana	Clade 8c	8	P. mexicana	KP699877	This study	N/A	N/A
330	Poecilia sp.	Ingroup	7914	STRI-NFC 7914	Río Sebol at Finca Sebol	Río Sebol	Río Usumacinta	Atlantic	Guatemala	Guat	15.8063	-89.9448	P. mexicana	Clade 8c	8	P. mexicana	KP699878	This study	N/A	N/A
331	Poecilia sp.	Ingroup	7915	STRI-NFC 7915	Río Sebol at Finca Sebol	Río Sebol	Río Usumacinta	Atlantic	Guatemala	Guat	15.8063	-89.9448	P. mexicana	Clade 8c	8	P. mexicana	KP699879	This study	N/A	N/A
332	Poecilia sp.	Ingroup	7925	STRI-NFC 7925	Río Sebol at Finca Sebol	Río Sebol	Río Usumacinta	Atlantic	Guatemala	Guat	15.8063	-89.9448	P. mexicana	Clade 8c	8	P. mexicana	KP699880	This study	N/A	N/A
333	Poecilia sp.	Ingroup	7854	STRI-NFC 7854	San Simon	Río Usumacinta	Río Usumacinta	Atlantic	Guatemala	Guat	15.8411	-90.2892	P. mexicana	Clade 8c	8	P. mexicana	KP699875	This study	N/A	N/A
334	Poecilia sp.	Ingroup	7839	STRI-NFC 7839	San Simon	Río Usumacinta	Río Usumacinta	Atlantic	Guatemala	Guat	15.8411	-90.2892	P. mexicana	Clade 8c	8	P. mexicana	KP699874	This study	N/A	N/A
335	Poecilia sp.	Ingroup	7999	STRI-NFC 7999	Río La Pasion	Río La Pasion	Río Usumacinta	Atlantic	Guatemala	Guat	16.5506	-90.2301	P. mexicana	Clade 8c	8	P. mexicana	KP699886	This study	N/A	N/A
336	Poecilia sp.	Ingroup	7957	STRI-NFC 7957	Arroyo Comiston at La Pasion	Río La Pasion	Río Usumacinta	Atlantic	Guatemala	Guat	16.5544	-90.1927	P. mexicana	Clade 8c	8	P. mexicana	KP699881	This study	N/A	N/A
337	Poecilia sp.	Ingroup	7855	STRI-NFC 7855	San Simon	Río Usumacinta	Río Usumacinta	Atlantic	Guatemala	Guat	15.8411	-90.2892	P. mexicana	Clade 8c	8	P. mexicana	KP699876	This study	N/A	N/A
338	Poecilia sp.	Ingroup	7995	STRI-NFC 7995	Río La Pasion	Río La Pasion	Río Usumacinta	Atlantic	Guatemala	Guat	16.5506	-90.2301	P. mexicana	Clade 8c	8	P. mexicana	KP699884	This study	N/A	N/A
339	Poecilia sp.	Ingroup	7996	STRI-NFC 7996	Río La Pasion	Río La Pasion	Río Usumacinta	Atlantic	Guatemala	Guat	16.5506	-90.2301	P. mexicana	Clade 8c	8	P. mexicana	KP699885	This study	N/A	N/A
340	Poecilia sp.	Ingroup	7958	STRI-NFC 7958	Arroyo Comiston, trib. to Río La Pasion, at La Pasion	Río La Pasion	Río Usumacinta	Atlantic	Guatemala	Guat	16.5544	-90.1927	P. mexicana	Clade 8c	8	P. mexicana	KP699882	This study	N/A	N/A
341	Poecilia sp.	Ingroup	7960	STRI-NFC 7960	Arroyo Comiston, trib. to Río La Pasion, at La Pasion	Río La Pasion	Río Usumacinta	Atlantic	Guatemala	Guat	16.5544	-90.1927	P. mexicana	Clade 8c	8	P. mexicana	KP699883	This study	N/A	N/A
342	Poecilia sp.	Ingroup	8111	STRI-NFC 8111	Zona Militar Estanque, locality approximated	Lago Peten	Lago Peten	Atlantic	Guatemala	Guat	16.9029	-89.7293	P. mexicana	Clade 8c	8	P. mexicana	KP699888	This study	N/A	N/A
343	Poecilia sp.	Ingroup	8113	STRI-NFC 8113	Zona Militar Estanque, locality approximated	Lago Peten	Lago Peten	Atlantic	Guatemala	Guat	16.9029	-89.7293	P. mexicana	Clade 8c	8	P. mexicana	KP699890	This study	N/A	N/A
344	Poecilia sp.	Ingroup	8114	STRI-NFC 8114	Zona Militar Estanque, locality approximated	Lago Peten	Lago Peten	Atlantic	Guatemala	Guat	16.9029	-89.7293	P. mexicana	Clade 8c	8	P. mexicana	KP699891	This study	N/A	N/A
345	Poecilia sp.	Ingroup	8084	STRI-NFC 8084	Arroyo Sal Si Puedes, Belize	Río Belize	Río Belize	Atlantic	Guatemala	Guat	16.9573	-89.3593	P. mexicana	Clade 8c	8	P. mexicana	KP699887	This study	N/A	N/A
346	Poecilia mexicana	Ingroup	PmmxIxt3_0	Palacios et al. (2013)	Río Ixtapangajoya, Chiapas state	Río Ixtapangajoya	Río Ixtapangajoya	Atlantic	Mexico	Mex	17.495	-92.998	P. mexicana	Clade 8c	8	P. mexicana	KF276633	Palacios et al. (2013)	N/A	N/A
347	Poecilia mexicana	Ingroup	PmmxIxt2_0	Palacios et al. (2013)	Río Ixtapangajoya, Chiapas state	Río Ixtapangajoya	Río Ixtapangajoya	Atlantic	Mexico	Mex	17.495	-92.998	P. mexicana	Clade 8c	8	P. mexicana	KF276632	Palacios et al. (2013)	N/A	N/A
348	Poecilia mexicana	Ingroup	PmmxNSSm_0	Palacios et al. (2013)	Tributary to Río Ixtapangajoya, Chiapas state	Río Ixtapangajoya	Río Ixtapangajoya	Atlantic	Mexico	Mex	17.51	-92.98	P. mexicana	Clade 8c	8	P. mexicana	KF276629	Palacios et al. (2013)	N/A	N/A
349	Poecilia mexicana	Ingroup	PmmxIxta_0	Palacios et al. (2013)	Río Ixtapangajoya, Chiapas state	Río Ixtapangajoya	Río Ixtapangajoya	Atlantic	Mexico	Mex	17.495	-92.998	P. mexicana	Clade 8c	8	P. mexicana	KF276631	Palacios et al. (2013)	N/A	N/A
350	Poecilia mexicana	Ingroup	Pmmex14	Tobler et al. (2011)	Río Pichucalco, Baños del Azufre	Río Pichucalco	Río Pichucalco	Atlantic	Mexico	Mex	17.552	-92.999	P. mexicana	Clade 8c	8	P. mexicana	HQ677877	Tobler et al. (2011)	N/A	N/A
351	Poecilia mexicana	Ingroup	PmmxNSS2_0	Palacios et al. (2013)	Tributary to Río Ixtapangajoya, Chiapas state	Unnamed trib.	Río Ixtapangajoya	Atlantic	Mexico	Mex	17.51	-92.98	P. mexicana	Clade 8c	8	P. mexicana	KF276630	Palacios et al. (2013)	N/A	N/A
352	Poecilia mexicana	Ingroup	Pmmex24	Tobler et al. (2011)	Río Puyacatengo, Río Pichucalco, La Joya, Santa Ana	Río Puyacatengo	Río Puyacatengo	Atlantic	Mexico	Mex	N/A	N/A	P. mexicana	Clade 8c	8	P. mexicana	HQ677887	Tobler et al. (2011)	N/A	N/A
353	Poecilia mexicana	Ingroup	Pmmex17	Tobler et al. (2011)	Río Puyacatengo, Vicente Gurrero Lerma	Río Puyacatengo	Río Puyacatengo	Atlantic	Mexico	Mex	17.5101	-92.9145	P. mexicana	Clade 8c	8	P. mexicana	HQ677880	Tobler et al. (2011)	N/A	N/A
354	Poecilia mexicana	Ingroup	PmmxPysp_0	Palacios et al. (2013)	Puyacatengo Springs, in Tabasco state	Río Puyacatengo	Río Puyacatengo	Atlantic	Mexico	Mex	17.458	-92.889	P. mexicana	Clade 8c	8	P. mexicana	KF276616	Palacios et al. (2013)	N/A	N/A
355	Poecilia mexicana	Ingroup	Pmmex33	Tobler et al. (2011)	Río Puyacatengo, Baños del Azufre	Río Puyacatengo	Río Puyacatengo	Atlantic	Mexico	Mex	17.5523	-92.9986	P. mexicana	Clade 8c	8	P. mexicana	HQ677896	Tobler et al. (2011)	N/A	N/A
356	Poecilia mexicana	Ingroup	Pmmex32	Tobler et al. (2011)	Río Puyacatengo, Vicente Gurrero Lerma	Río Puyacatengo	Río Puyacatengo	Atlantic	Mexico	Mex	17.5101	-92.9145	P. mexicana	Clade 8c	8	P. mexicana	HQ677895	Tobler et al. (2011)	N/A	N/A
357	Poecilia mexicana	Ingroup	Pmmex31	Tobler et al. (2011)	Puyacatengo Springs, in Tabasco state	Río Puyacatengo	Río Puyacatengo	Atlantic	Mexico	Mex	17.458	-92.889	P. mexicana	Clade 8c	8	P. mexicana	HQ677894	Tobler et al. (2011)	N/A	N/A
358	Poecilia mexicana	Ingroup	PmmxCDA_0	Palacios et al. (2013)	Cueva del Azufre, Tabasco state	Río Tacotalpa	Río Tacotalpa	Atlantic	Mexico	Mex	17.4384	-92.7748	P. mexicana	Clade 8c	8	P. mexicana	KF276615	Palacios et al. (2013)	N/A	N/A
359	Poecilia mexicana	Ingroup	Pmmex34	Tobler et al. (2011)	Cueva del Azufre, Tabasco state	Río Tacotalpa	Río Tacotalpa	Atlantic	Mexico	Mex	17.4384	-92.7748	P. mexicana	Clade 8c	8	P. mexicana	HQ677897	Tobler et al. (2011)	N/A	N/A
360	Poecilia mexicana	Ingroup	Pmmex30	Tobler et al. (2011)	Río Tacotalpa, Arroyo Tres	Río Tacotalpa	Río Tacotalpa	Atlantic	Mexico	Mex	17.484	-92.776	P. mexicana	Clade 8c	8	P. mexicana	HQ677893	Tobler et al. (2011)	N/A	N/A
361	Poecilia mexicana	Ingroup	Pmmex29	Tobler et al. (2011)	Río Nututun, Palenque	Río Nututun	Río Nututun	Atlantic	Mexico	Mex	17.4842	-91.9738	P. mexicana	Clade 8c	8	P. mexicana	HQ677892	Tobler et al. (2011)	N/A	N/A
362	Poecilia mexicana	Ingroup	Pmmex28	Tobler et al. (2011)	Río Oxolotan, Tapijulapa	Río Oxolotan	Río Oxolotan	Atlantic	Mexico	Mex	17.4644	-92.7743	P. mexicana	Clade 8c	8	P. mexicana	HQ677891	Tobler et al. (2011)	N/A	N/A
363	Poecilia mexicana	Ingroup	Pmmex27	Tobler et al. (2011)	Río Tacotalpa, Arroyo Bonita	Río Tacotalpa	Río Tacotalpa	Atlantic	Mexico	Mex	17.4269	-92.7521	P. mexicana	Clade 8c	8	P. mexicana	HQ677890	Tobler et al. (2011)	N/A	N/A
364	Poecilia mexicana	Ingroup	Pmmex26	Tobler et al. (2011)	Río Tacotalpa, Arroyo Bonita	Río Tacotalpa	Río Tacotalpa	Atlantic	Mexico	Mex	17.4269	-92.7521	P. mexicana	Clade 8c	8	P. mexicana	HQ677889	Tobler et al. (2011)	N/A	N/A
365	Poecilia mexicana	Ingroup	Pmmex25	Tobler et al. (2011)	Río Pichaculco, Arroyo Rosita	Río Pichucalco	Río Pichucalco	Atlantic	Mexico	Mex	17.485	-93.104	P. mexicana	Clade 8c	8	P. mexicana	HQ677888	Tobler et al. (2011)	N/A	N/A
366	Poecilia mexicana	Ingroup	Pmmex23	Tobler et al. (2011)	Río Puyacatengo, La Lluvia	Río Puyacatengo	Río Puyacatengo	Atlantic	Mexico	Mex	17.464	-92.895	P. mexicana	Clade 8c	8	P. mexicana	HQ677886	Tobler et al. (2011)	N/A	N/A
367	Poecilia mexicana	Ingroup	Pmmex22	Tobler et al. (2011)	Río Puyacatengo, La Lluvia	Río Puyacatengo	Río Puyacatengo	Atlantic	Mexico	Mex	17.464	-92.895	P. mexicana	Clade 8c	8	P. mexicana	HQ677885	Tobler et al. (2011)	N/A	N/A
368	Poecilia mexicana	Ingroup	Pmmex21	Tobler et al. (2011)	Río Puyacatengo, La Lluvia	Río Puyacatengo	Río Puyacatengo	Atlantic	Mexico	Mex	17.464	-92.895	P. mexicana	Clade 8c	8	P. mexicana	HQ677884	Tobler et al. (2011)	N/A	N/A
369	Poecilia mexicana	Ingroup	Pmmex20	Tobler et al. (2011)	Río Puyacatengo, La Lluvia, Puyacatengo Springs	Río Puyacatengo	Río Puyacatengo	Atlantic	Mexico	Mex	17.4576	-92.8889	P. mexicana	Clade 8c	8	P. mexicana	HQ677883	Tobler et al. (2011)	N/A	N/A
370	Poecilia mexicana	Ingroup	Pmmex19	Tobler et al. (2011)	Río Puyacatengo, Puyacatengo Springs	Río Puyacatengo	Río Puyacatengo	Atlantic	Mexico	Mex	17.4576	-92.8889	P. mexicana	Clade 8c	8	P. mexicana	HQ677882	Tobler et al. (2011)	N/A	N/A
371	Poecilia mexicana	Ingroup	Pmmex18	Tobler et al. (2011)	Río Puyacatengo, Vicente Gurrero Lerma	Río Puyacatengo	Río Puyacatengo	Atlantic	Mexico	Mex	17.5101	-92.9145	P. mexicana	Clade 8c	8	P. mexicana	HQ677881	Tobler et al. (2011)	N/A	N/A
372	Poecilia mexicana	Ingroup	Pmmex15	Tobler et al. (2011)	Río Pichucalco, Baños del Azufre	Río Pichucalco	Río Pichucalco	Atlantic	Mexico	Mex	17.5523	-92.9986	P. mexicana	Clade 8c	8	P. mexicana	HQ677878	Tobler et al. (2011)	N/A	N/A
373	Poecilia mexicana	Ingroup	Pmmex16	Tobler et al. (2011)	Río Pichucalco, Baños del Azufre	Río Pichucalco	Río Pichucalco	Atlantic	Mexico	Mex	17.5523	-92.9986	P. mexicana	Clade 8c	8	P. mexicana	HQ677879	Tobler et al. (2011)	N/A	N/A
374	Poecilia gillii	Ingroup	PG805.03	MLBM 129612	Quebrada La Canela	Río Tarcoles	Río Grande de Tarcoles	Pacific	Costa Rica	CR	9.85151	-84.5277	P. mexicana	Clade 8d	8	P. mexicana	FJ446374	Lee & Johnson (2009)	N/A	N/A
375	Poecilia gillii	Ingroup	PGB701.01	MLBM 235184	Trib. to Río Reventazon at Rd. 232 across from Angostura Lagoon	Río Reventazon	Río Reventazon	Atlantic	Costa Rica	CR	9.8723	-83.6332	P. mexicana	Clade 8d	8	P. mexicana	FJ446207	Lee & Johnson (2009)	N/A	N/A
376	Poecilia gillii	Ingroup	PGB701.02	MLBM 235185	Trib. to Río Reventazon at Rd. 232 across from Angostura Lagoon	Río Reventazon	Río Reventazon	Atlantic	Costa Rica	CR	9.8723	-83.6332	P. mexicana	Clade 8d	8	P. mexicana	FJ446208	Lee & Johnson (2009)	KP700515	This study
377	Poecilia gillii	Ingroup	PGB701.03	MLBM 235366	Trib. to Río Reventazon at Rd. 232 across from Angostura Lagoon	Río Reventazon	Río Reventazon	Atlantic	Costa Rica	CR	9.8723	-83.6332	P. mexicana	Clade 8d	8	P. mexicana	FJ446209	Lee & Johnson (2009)	N/A	N/A
378	Poecilia gillii	Ingroup	PGB701.04	MLBM 235367	Trib. to Río Reventazon at Rd. 232 across from Angostura Lagoon	Río Reventazon	Río Reventazon	Atlantic	Costa Rica	CR	9.8723	-83.6332	P. mexicana	Clade 8d	8	P. mexicana	FJ446210	Lee & Johnson (2009)	N/A	N/A
379	Poecilia gillii	Ingroup	15655	STRI-NFC 15655	Quebrada Tortuguita	Quebrada Tortuguita	Río Cocle del Norte	Atlantic	Panama	Pan	8.88128	-80.3909	P. mexicana	Clade 8d	8	P. mexicana	KP700093	This study	KP700452	This study
380	Poecilia gillii	Ingroup	2074	STRI-NFC 2074	Trib. (Río Peje?) to Río General just east of CR Hwy 2	Río Terraba	Río Terraba	Pacific	Costa Rica	CR	9.28493	-83.6457	P. mexicana	Clade 8d	8	P. mexicana	KP699815	This study	N/A	N/A
381	Poecilia gillii	Ingroup	PGB702.01	MLBM 235216	Unnamed trib at CR Hwy 239, in between Las Lomas and Finca La Palma, ~0.25 km NW of Finca La Palma	Estero Palma (Río Palma)	Estero Palma	Pacific	Costa Rica	CR	9.53697	-84.3859	P. mexicana	Clade 8d	8	P. mexicana	FJ446400	Lee & Johnson (2009)	KP700516	This study
382	Poecilia gillii	Ingroup	PGB702.02	MLBM 235217	Unnamed trib at CR Hwy 239, in between Las Lomas and Finca La Palma, ~0.25 km NW of Finca La Palma	Estero Palma (Río Palma)	Estero Palma	Pacific	Costa Rica	CR	9.53697	-84.3859	P. mexicana	Clade 8d	8	P. mexicana	FJ446401	Lee & Johnson (2009)	N/A	N/A
383	Poecilia gillii	Ingroup	PGB702.04	MLBM 235219	Unnamed trib at CR Hwy 239, in between Las Lomas and Finca La Palma, ~0.25 km NW of Finca La Palma	Estero Palma (Río Palma)	Estero Palma	Pacific	Costa Rica	CR	9.53697	-84.3859	P. mexicana	Clade 8d	8	P. mexicana	FJ446403	Lee & Johnson (2009)	N/A	N/A
384	Poecilia gillii	Ingroup	PGB702.03	MLBM 235218	Unnamed trib at CR Hwy 239, in between Las Lomas and Finca La Palma, ~0.25 km NW of Finca La Palma	Estero Palma (Río Palma)	Estero Palma	Pacific	Costa Rica	CR	9.53697	-84.3859	P. mexicana	Clade 8d	8	P. mexicana	FJ446402	Lee & Johnson (2009)	N/A	N/A
385	Poecilia gillii	Ingroup	PG517.01	MLBM 235220	Río Barrigones at CR Hwy 245, Osa Peninsula, Golfo Dulce	Río Barrigones	Golfo Dulce	Pacific	Costa Rica	CR	8.59323	-83.4218	P. mexicana	Clade 8d	8	P. mexicana	FJ446171	Lee & Johnson (2009)	N/A	N/A
386	Poecilia gillii	Ingroup	PG517.02	MLBM 235221	Río Barrigones at CR Hwy 245, Osa Peninsula, Golfo Dulce	Río Barrigones	Golfo Dulce	Pacific	Costa Rica	CR	8.59323	-83.4218	P. mexicana	Clade 8d	8	P. mexicana	FJ446172	Lee & Johnson (2009)	N/A	N/A
387	Poecilia gillii	Ingroup	PGB714.01	MLBM 235222	Río Nuevo	Río Nuevo	Río Coto	Pacific	Costa Rica	CR	8.64103	-82.953	P. mexicana	Clade 8d	8	P. mexicana	FJ446412	Lee & Johnson (2009)	N/A	N/A
388	Poecilia gillii	Ingroup	PGB714.02	MLBM 235223	Río Nuevo	Río Nuevo	Río Coto	Pacific	Costa Rica	CR	8.64103	-82.953	P. mexicana	Clade 8d	8	P. mexicana	FJ446413	Lee & Johnson (2009)	N/A	N/A
389	Poecilia gillii	Ingroup	2051	STRI-NFC 2051	Río Salama Nuevo, 1 km S of Pan American Hwy (CR 2) and 1 km east of Finca Doce	Río Salama Nuevo	Río Sierpe	Pacific	Costa Rica	CR	8.90425	-83.4393	P. mexicana	Clade 8d	8	P. mexicana	KP699813	This study	N/A	N/A
390	Poecilia gillii	Ingroup	PG4810.01	Lee & Johnson (2009)	Río Pejibaye	Río Pejibaye	Río Terraba	Pacific	Costa Rica	CR	9.15694	-83.5753	P. mexicana	Clade 8d	8	P. mexicana	N/A	Lee & Johnson (2009)	N/A	N/A
391	Poecilia gillii	Ingroup	PG4810.02	Lee & Johnson (2009)	Río Pejibaye	Río Pejibaye	Río Terraba	Pacific	Costa Rica	CR	9.15694	-83.5753	P. mexicana	Clade 8d	8	P. mexicana	N/A	Lee & Johnson (2009)	N/A	N/A
392	Poecilia gillii	Ingroup	PG4810.03	Lee & Johnson (2009)	Río Pejibaye	Río Pejibaye	Río Terraba	Pacific	Costa Rica	CR	9.15694	-83.5753	P. mexicana	Clade 8d	8	P. mexicana	N/A	Lee & Johnson (2009)	N/A	N/A
393	Poecilia gillii	Ingroup	PG4810.05	Lee & Johnson (2009)	Río Pejibaye	Río Pejibaye	Río Terraba	Pacific	Costa Rica	CR	9.15694	-83.5753	P. mexicana	Clade 8d	8	P. mexicana	N/A	Lee & Johnson (2009)	N/A	N/A
394	Poecilia gillii	Ingroup	PG4810.06	Lee & Johnson (2009)	Río Pejibaye	Río Pejibaye	Río Terraba	Pacific	Costa Rica	CR	9.15694	-83.5753	P. mexicana	Clade 8d	8	P. mexicana	N/A	Lee & Johnson (2009)	N/A	N/A
395	Poecilia gillii	Ingroup	PG4810.07	Lee & Johnson (2009)	Río Pejibaye	Río Pejibaye	Río Terraba	Pacific	Costa Rica	CR	9.15694	-83.5753	P. mexicana	Clade 8d	8	P. mexicana	N/A	Lee & Johnson (2009)	N/A	N/A
396	Poecilia gillii	Ingroup	PG4810.08	Lee & Johnson (2009)	Río Pejibaye	Río Pejibaye	Río Terraba	Pacific	Costa Rica	CR	9.15694	-83.5753	P. mexicana	Clade 8d	8	P. mexicana	N/A	Lee & Johnson (2009)	N/A	N/A
397	Poecilia gillii	Ingroup	PG4810.09	Lee & Johnson (2009)	Río Pejibaye	Río Pejibaye	Río Terraba	Pacific	Costa Rica	CR	9.15694	-83.5753	P. mexicana	Clade 8d	8	P. mexicana	N/A	Lee & Johnson (2009)	N/A	N/A
398	Poecilia gillii	Ingroup	PG4810.10	Lee & Johnson (2009)	Río Pejibaye	Río Pejibaye	Río Terraba	Pacific	Costa Rica	CR	9.15694	-83.5753	P. mexicana	Clade 8d	8	P. mexicana	N/A	Lee & Johnson (2009)	N/A	N/A
399	Poecilia gillii	Ingroup	PG4810.12	Lee & Johnson (2009)	Río Pejibaye	Río Pejibaye	Río Terraba	Pacific	Costa Rica	CR	9.15694	-83.5753	P. mexicana	Clade 8d	8	P. mexicana	N/A	Lee & Johnson (2009)	N/A	N/A
400	Poecilia gillii	Ingroup	PG4810.13	Lee & Johnson (2009)	Río Pejibaye	Río Pejibaye	Río Terraba	Pacific	Costa Rica	CR	9.15694	-83.5753	P. mexicana	Clade 8d	8	P. mexicana	N/A	Lee & Johnson (2009)	N/A	N/A
401	Poecilia gillii	Ingroup	PG4810.14	Lee & Johnson (2009)	Río Pejibaye	Río Pejibaye	Río Terraba	Pacific	Costa Rica	CR	9.15694	-83.5753	P. mexicana	Clade 8d	8	P. mexicana	N/A	Lee & Johnson (2009)	N/A	N/A
402	Poecilia gillii	Ingroup	PG4810.15	Lee & Johnson (2009)	Río Pejibaye	Río Pejibaye	Río Terraba	Pacific	Costa Rica	CR	9.15694	-83.5753	P. mexicana	Clade 8d	8	P. mexicana	N/A	Lee & Johnson (2009)	N/A	N/A
403	Poecilia gillii	Ingroup	PG4814.02	Lee & Johnson (2009)	Río General	Río General	Río Terraba	Pacific	Costa Rica	CR	9.38944	-83.6636	P. mexicana	Clade 8d	8	P. mexicana	N/A	Lee & Johnson (2009)	N/A	N/A
404	Poecilia gillii	Ingroup	PGB706.01	MLBM 235224	Río Carbon at Rd. 801 just across from Colegio Técnico Profesional Talamanca, in Bribri	Río Carbon	Río Sixaola	Pacific	Costa Rica	CR	9.62312	-82.8552	P. mexicana	Clade 8d	8	P. mexicana	FJ446408	Lee & Johnson (2009)	N/A	N/A
405	Poecilia gillii	Ingroup	PGB706.02	MLBM 235225	Río Carbon at Rd. 801 just across from Colegio Técnico Profesional Talamanca, in Bribri	Río Carbon	Río Sixaola	Pacific	Costa Rica	CR	9.62312	-82.8552	P. mexicana	Clade 8d	8	P. mexicana	FJ446409	Lee & Johnson (2009)	N/A	N/A
406	Poecilia gillii	Ingroup	PGB706.03	MLBM 235226	Río Carbon at Rd. 801 just across from Colegio Técnico Profesional Talamanca, in Bribri	Río Carbon	Río Sixaola	Pacific	Costa Rica	CR	9.62312	-82.8552	P. mexicana	Clade 8d	8	P. mexicana	FJ446410	Lee & Johnson (2009)	N/A	N/A
407	Poecilia gillii	Ingroup	PGB706.04	MLBM 235227	Río Carbon at Rd. 801 just across from Colegio Técnico Profesional Talamanca, in Bribri	Río Carbon	Río Sixaola	Pacific	Costa Rica	CR	9.62312	-82.8552	P. mexicana	Clade 8d	8	P. mexicana	FJ446411	Lee & Johnson (2009)	N/A	N/A
408	Poecilia gillii	Ingroup	PG4810.04	Lee & Johnson (2009)	Río Pejibaye	Río Pejibaye	Río Terraba	Pacific	Costa Rica	CR	9.15694	-83.5753	P. mexicana	Clade 8d	8	P. mexicana	N/A	Lee & Johnson (2009)	N/A	N/A
409	Poecilia gillii	Ingroup	PG4810.11	Lee & Johnson (2009)	Río Pejibaye	Río Pejibaye	Río Terraba	Pacific	Costa Rica	CR	9.15694	-83.5753	P. mexicana	Clade 8d	8	P. mexicana	N/A	Lee & Johnson (2009)	N/A	N/A
410	Poecilia gillii	Ingroup	PG4814.01	Lee & Johnson (2009)	Río General	Río Terraba	Río Terraba	Pacific	Costa Rica	CR	9.38944	-83.6636	P. mexicana	Clade 8d	8	P. mexicana	N/A	Lee & Johnson (2009)	N/A	N/A
411	Poecilia gillii	Ingroup	PGB704.01	N/A	Unnamed trib. to Río Sixaola at CR Hwy 36, ~3.2 km NE of Bribri, CR	Río Sixaola	Río Sixaola	Atlantic	Costa Rica	CR	9.63203	-82.8192	P. mexicana	Clade 8d	8	P. mexicana	KP700407	This study	N/A	N/A
412	Poecilia gillii	Ingroup	PGB704.02	N/A	Unnamed trib. to Río Sixaola at CR Hwy 36, ~3.2 km NE of Bribri, CR	Río Sixaola	Río Sixaola	Atlantic	Costa Rica	CR	9.63203	-82.8192	P. mexicana	Clade 8d	8	P. mexicana	KP700408	This study	KP700517	This study
413	Poecilia gillii	Ingroup	PGB704.04	N/A	Unnamed trib. to Río Sixaola at CR Hwy 36, ~3.2 km NE of Bribri, CR	Río Sixaola	Río Sixaola	Atlantic	Costa Rica	CR	9.63203	-82.8192	P. mexicana	Clade 8d	8	P. mexicana	KP700410	This study	N/A	N/A
414	Poecilia gillii	Ingroup	PGB704.03	N/A	Unnamed trib. to Río Sixaola at CR Hwy 36, ~3.2 km NE of Bribri, CR	Río Sixaola	Río Sixaola	Atlantic	Costa Rica	CR	9.63203	-82.8192	P. mexicana	Clade 8d	8	P. mexicana	KP700409	This study	N/A	N/A
415	Poecilia gillii	Ingroup	9791	STRI-NFC 9791	Río Moreno (road to Coclesito)	Río Moreno	Río Cocle del Norte	Atlantic	Panama	Pan	8.7745	-80.5278	P. mexicana	Clade 8e	8	P. mexicana	KP699992	This study	N/A	N/A
416	Poecilia gillii	Ingroup	642	STRI-NFC 642	Río Guarúmo	Río Guabo	Laguna de Chiriqui	Atlantic	Panama	Pan	8.8725	-82.1893	P. mexicana	Clade 8e	8	P. mexicana	KP699790	This study	N/A	N/A
417	Poecilia gillii	Ingroup	11625	STRI-NFC 11625	Río Canazas at Chiriqui Grande Rd, trib to Río Guarumo	Río Guabo	Laguna de Chiriqui	Atlantic	Panama	Pan	8.87333	-82.1744	P. mexicana	Clade 8e	8	P. mexicana	KP700002	This study	N/A	N/A
418	Poecilia gillii	Ingroup	16199	STRI-NFC 16199	Trib. to Río Guarúmo near Punta Peña	Río Guabo	Laguna de Chiriqui	Atlantic	Panama	Pan	8.87594	-82.1746	P. mexicana	Clade 8e	8	P. mexicana	KP700106	This study	N/A	N/A
419	Poecilia gillii	Ingroup	12376	STRI-NFC 12376	Río Cricamola	Río Cricamola	Río Cricamola	Atlantic	Panama	Pan	8.91728	-81.8773	P. mexicana	Clade 8e	8	P. mexicana	KP700006	This study	N/A	N/A
420	Poecilia gillii	Ingroup	6379	STRI-NFC 6379	Unnamed trib. to Río Guarúmo just off Hwy 10 1.2 km N of Punta Peña (draining to Chiriqui Lagoon, Bocas del Toro)	Río Guabo	Laguna de Chiriqui	Atlantic	Panama	Pan	8.92853	-82.1803	P. mexicana	Clade 8e	8	P. mexicana	KP699852	This study	N/A	N/A
421	Poecilia gillii	Ingroup	16197	STRI-NFC 16197	Creek trib. to Río Guarúmo near Punta Peña, Río Punta Agua Real	Río Guabo	Laguna de Chiriqui	Atlantic	Panama	Pan	8.94608	-82.1571	P. mexicana	Clade 8e	8	P. mexicana	KP700105	This study	N/A	N/A
422	Poecilia gillii	Ingroup	12521	STRI-NFC 12521	Río Guarúmo	Río Guabo	Laguna de Chiriqui	Atlantic	Panama	Pan	9	-82.1833	P. mexicana	Clade 8e	8	P. mexicana	KP700013	This study	N/A	N/A
423	Poecilia gillii	Ingroup	6846	STRI-NFC 6846	Río Robalo	Río Robalo	Río Robalo	Atlantic	Panama	Pan	9.04056	-82.2858	P. mexicana	Clade 8e	8	P. mexicana	KP699856	This study	N/A	N/A
424	Poecilia gillii	Ingroup	6847	STRI-NFC 6847	Río Robalo	Río Robalo	Río Robalo	Atlantic	Panama	Pan	9.04056	-82.2858	P. mexicana	Clade 8e	8	P. mexicana	KP699857	This study	N/A	N/A
425	Poecilia gillii	Ingroup	12473	STRI-NFC 12473	Quebrada on Km 26 at Punta Peña Almirante Rd	Quebrada Cilico Creek	Laguna de Chiriqui	Atlantic	Panama	Pan	9.06628	-82.2991	P. mexicana	Clade 8e	8	P. mexicana	KP700011	This study	N/A	N/A
426	Poecilia gillii	Ingroup	15849	STRI-NFC 15849	Río Pedro Miguel	Río Grande	Panama Canal	Pacific	Panama	Pan	9.08067	-79.6251	P. mexicana	Clade 8e	8	P. mexicana	KP700094	This study	N/A	N/A
427	Poecilia gillii	Ingroup	18791	STRI-NFC 18791	Quebrada Traicionera, trib. to Río Uyama	Río Uyama	Laguna de Chiriqui	Atlantic	Panama	Pan	9.13892	-82.3069	P. mexicana	Clade 8e	8	P. mexicana	KP700165	This study	N/A	N/A
428	Poecilia gillii	Ingroup	12459	STRI-NFC 12459	Small creek on km 41 of Punta Peña Almirante Rd	Río Uyama	Laguna de Chiriqui	Atlantic	Panama	Pan	9.14753	-82.3177	P. mexicana	Clade 8e	8	P. mexicana	KP700010	This study	N/A	N/A
429	Poecilia gillii	Ingroup	11374	STRI-NFC 11374	Río Chichebre	Río Bayano	Río Bayano	Pacific	Panama	Pan	9.16083	-79.1542	P. mexicana	Clade 8e	8	P. mexicana	KP699999	This study	N/A	N/A
430	Poecilia gillii	Ingroup	2851	STRI-NFC 2851	Río Utive	Río Pacora	Río Pacora	Pacific	Panama	Pan	9.16417	-79.34	P. mexicana	Clade 8e	8	P. mexicana	KP699822	This study	N/A	N/A
431	Poecilia gillii	Ingroup	18787	STRI-NFC 18787	Quebrada Nigua, 1.5 km SW of Almirante, Bocas del Toro	Quebrada Nigua	Estero de Almirante	Atlantic	Panama	Pan	9.27894	-82.4153	P. mexicana	Clade 8e	8	P. mexicana	KP700164	This study	N/A	N/A
432	Poecilia gillii	Ingroup	12428	STRI-NFC 12428	Quebrada by Almirante to Changuinola Rd	Río Changuinola	Río Changuinola	Atlantic	Panama	Pan	9.31469	-82.4504	P. mexicana	Clade 8e	8	P. mexicana	KP700008	This study	N/A	N/A
433	Poecilia gillii	Ingroup	4992	STRI-NFC 4992	Río Bongie	Río Bongie	Río Changuinola	Atlantic	Panama	Pan	9.3599	-82.61	P. mexicana	Clade 8e	8	P. mexicana	KP699850	This study	N/A	N/A
434	Poecilia gillii	Ingroup	4993	STRI-NFC 4993	Río Bongie	Río Bongie	Río Changuinola	Atlantic	Panama	Pan	9.3599	-82.61	P. mexicana	Clade 8e	8	P. mexicana	KP699851	This study	N/A	N/A
435	Poecilia gillii	Ingroup	4979	STRI-NFC 4979	Río Bongie	Río Bongie	Río Changuinola	Atlantic	Panama	Pan	9.3599	-82.61	P. mexicana	Clade 8e	8	P. mexicana	KP699848	This study	N/A	N/A
436	Poecilia gillii	Ingroup	4980	STRI-NFC 4980	Río Bongie	Río Bongie	Río Changuinola	Atlantic	Panama	Pan	9.3599	-82.61	P. mexicana	Clade 8e	8	P. mexicana	KP699849	This study	N/A	N/A
437	Poecilia gillii	Ingroup	4969	STRI-NFC 4969	Río Teribe at El Silencio, confluence of Teribe and Changuinola Rivers	Río Changuinola	Río Changuinola	Atlantic	Panama	Pan	9.37	-82.54	P. mexicana	Clade 8e	8	P. mexicana	KP699847	This study	N/A	N/A
438	Poecilia gillii	Ingroup	18632	STRI-NFC 18632	Río Playa Alta, ~3 km E of Nombre de Dios, Colon	Río Playa Alta	Río Playa Alta	Atlantic	Panama	Pan	9.57069	-79.4361	P. mexicana	Clade 8e	8	P. mexicana	KP700159	This study	N/A	N/A
439	Poecilia gillii	Ingroup	12375	STRI-NFC 12375	Río Cricamola	Río Cricamola	Río Cricamola	Atlantic	Panama	Pan	8.91728	-81.8773	P. mexicana	Clade 8e	8	P. mexicana	KP700005	This study	N/A	N/A
440	Poecilia gillii	Ingroup	6380	STRI-NFC 6380	Stream trib. to Río Guarúmo near Punta Peña	Río Guabo	Laguna de Chiriqui	Atlantic	Panama	Pan	8.92853	-82.1803	P. mexicana	Clade 8e	8	P. mexicana	KP699853	This study	N/A	N/A
441	Poecilia gillii	Ingroup	12481	STRI-NFC 12481	Quebrada on Km 34 at Punta Peña-Almirante Rd	Río Uyama	Laguna de Chiriqui	Atlantic	Panama	Pan	9.11697	-82.2902	P. mexicana	Clade 8e	8	P. mexicana	KP700012	This study	KP700450	This study
442	Poecilia gillii	Ingroup	18782	STRI-NFC 18782	Quebrada Nigua	Quebrada Nigua	Estero de Almirante	Atlantic	Panama	Pan	9.27894	-82.4153	P. mexicana	Clade 8e	8	P. mexicana	KP700163	This study	N/A	N/A
443	Poecilia gillii	Ingroup	16786	STRI-NFC 16786	Quebrada en Mateo, at Pueblo Nuevo near Palmas Bellas	Río Lagarto	Río Lagarto	Atlantic	Panama	Pan	9.22581	-80.0859	P. mexicana	Clade 8e	8	P. mexicana	KP700142	This study	N/A	N/A
444	Poecilia gillii	Ingroup	1292	STRI-NFC 1292	Río Sixaola	Río Sixaola	Río Sixaola	Atlantic	Panama	Pan	9.59872	-82.8025	P. mexicana	Clade 8f	8	P. mexicana	KP699803	This study	KP700423	This study
445	Poecilia gillii	Ingroup	PG706.02	MLBM 235179	Río Hatillo Viejo	Río Carbon	Río Sixaola	Atlantic	Costa Rica	CR	9.62312	-82.8552	P. mexicana	Clade 8f	8	P. mexicana	FJ446226	Lee & Johnson (2009)	N/A	N/A
446	Poecilia gillii	Ingroup	PG706.03	MLBM 235378	Río Hatillo Viejo	Río Carbon	Río Sixaola	Atlantic	Costa Rica	CR	9.62312	-82.8552	P. mexicana	Clade 8f	8	P. mexicana	FJ446227	Lee & Johnson (2009)	KP700506	This study
447	Poecilia gillii	Ingroup	PG706.08	MLBM 235383	Río Hatillo Viejo	Río Carbon	Río Sixaola	Atlantic	Costa Rica	CR	9.62312	-82.8552	P. mexicana	Clade 8f	8	P. mexicana	FJ446232	Lee & Johnson (2009)	N/A	N/A
448	Poecilia sp.	Ingroup	167952	MLBM 167952	Unnamed trib. to Río Estelí, thus a trib. to Río Coco	Río Estelí	Río Coco	Atlantic	Nicaragua	N	13.0587	-86.3511	P. mexicana	Clade 8g	8	P. mexicana	KP700209	This study	N/A	N/A
449	Poecilia sp.	Ingroup	167953	MLBM 167953	Unnamed trib. to Río Estelí, thus a trib. to Río Coco	Río Estelí	Río Coco	Atlantic	Nicaragua	N	13.0587	-86.3511	P. mexicana	Clade 8g	8	P. mexicana	KP700210	This study	N/A	N/A
450	Poecilia sp.	Ingroup	167954	MLBM 167954	Unnamed trib. to Río Estelí, thus a trib. to Río Coco	Río Estelí	Río Coco	Atlantic	Nicaragua	N	13.0587	-86.3511	P. mexicana	Clade 8g	8	P. mexicana	KP700211	This study	N/A	N/A
451	Poecilia gillii	Ingroup	167955	MLBM 167955	Unnamed trib. to Río Estelí, thus a trib. to Río Coco	Río Estelí	Río Coco	Atlantic	Nicaragua	N	13.0587	-86.3511	P. mexicana	Clade 8g	8	P. mexicana	KP700212	This study	N/A	N/A
452	Poecilia gillii	Ingroup	167957	MLBM 167957	Unnamed trib. to Río Estelí, thus a trib. to Río Coco	Río Estelí	Río Coco	Atlantic	Nicaragua	N	13.0587	-86.3511	P. mexicana	Clade 8g	8	P. mexicana	KP700214	This study	N/A	N/A
453	Poecilia sp.	Ingroup	167959	MLBM 167959	Unnamed trib. to Río Estelí, thus a trib. to Río Coco	Río Estelí	Río Coco	Atlantic	Nicaragua	N	13.0587	-86.3511	P. mexicana	Clade 8g	8	P. mexicana	KP700216	This study	N/A	N/A
454	Poecilia sp.	Ingroup	13430	STRI-NFC 13430	Río Estelí	Río Estelí	Río Coco	Atlantic	Nicaragua	N	13.098	-86.3603	P. mexicana	Clade 8g	8	P. mexicana	KP700027	This study	N/A	N/A
455	Poecilia sp.	Ingroup	13431	STRI-NFC 13431	Río Estelí	Río Estelí	Río Coco	Atlantic	Nicaragua	N	13.098	-86.3603	P. mexicana	Clade 8g	8	P. mexicana	KP700028	This study	N/A	N/A
456	Poecilia gillii	Ingroup	174214	STRI-NFC 174214	Río Estelí in Estelí	Río Estelí	Río Coco	Atlantic	Nicaragua	N	13.1066	-86.3571	P. mexicana	Clade 8g	8	P. mexicana	KP700387	This study	N/A	N/A
457	Poecilia gillii	Ingroup	174215	STRI-NFC 174215	Río Estelí in Estelí	Río Estelí	Río Coco	Atlantic	Nicaragua	N	13.1066	-86.3571	P. mexicana	Clade 8g	8	P. mexicana	KP700388	This study	N/A	N/A
458	Poecilia gillii	Ingroup	174216	STRI-NFC 174216	Río Estelí in Estelí	Río Estelí	Río Coco	Atlantic	Nicaragua	N	13.1066	-86.3571	P. mexicana	Clade 8g	8	P. mexicana	KP700389	This study	N/A	N/A
459	Poecilia sp.	Ingroup	13451	STRI-NFC 13451	Río Macuelizo	Río Macuelizo	Río Coco	Atlantic	Nicaragua	N	13.6094	-86.4748	P. mexicana	Clade 8g	8	P. mexicana	KP700030	This study	N/A	N/A
460	Poecilia gillii	Ingroup	167958	MLBM 167958	Unnamed trib. to Río Estelí, thus a trib. to Río Coco	Río Estelí	Río Coco	Atlantic	Nicaragua	N	13.0587	-86.3511	P. mexicana	Clade 8g	8	P. mexicana	KP700215	This study	N/A	N/A
461	Poecilia sp.	Ingroup	13429	STRI-NFC 13429	Río Estelí	Río Estelí	Río Coco	Atlantic	Nicaragua	N	13.098	-86.3603	P. mexicana	Clade 8g	8	P. mexicana	KP700026	This study	N/A	N/A
462	Poecilia sp.	Ingroup	13988	STRI-NFC 13988	Río Orosal	Río Orosal	Río Coco	Atlantic	Nicaragua	N	13.3334	-86.2042	P. mexicana	Clade 8g	8	P. mexicana	KP700050	This study	N/A	N/A
463	Poecilia sp.	Ingroup	13876	STRI-NFC 13876	Quebrada Venquilla (afluente Río Pantasma)	Río Pantasma	Río Coco	Atlantic	Nicaragua	N	13.3381	-85.9488	P. mexicana	Clade 8g	8	P. mexicana	KP700036	This study	N/A	N/A
464	Poecilia sp.	Ingroup	13997	STRI-NFC 13997	Río Milan	Río Milan	Río Coco	Atlantic	Nicaragua	N	13.4247	-85.985	P. mexicana	Clade 8g	8	P. mexicana	KP700051	This study	N/A	N/A
465	Poecilia sp.	Ingroup	13921	STRI-NFC 13921	Río El Cua	Río El Cua	Río Coco	Atlantic	Nicaragua	N	13.5129	-85.8099	P. mexicana	Clade 8g	8	P. mexicana	KP700038	This study	N/A	N/A
466	Poecilia sp.	Ingroup	13922	STRI-NFC 13922	Río El Cua	Río El Cua	Río Coco	Atlantic	Nicaragua	N	13.5129	-85.8099	P. mexicana	Clade 8g	8	P. mexicana	KP700039	This study	N/A	N/A
467	Poecilia sp.	Ingroup	13923	STRI-NFC 13923	Río El Cua	Río El Cua	Río Coco	Atlantic	Nicaragua	N	13.5129	-85.8099	P. mexicana	Clade 8g	8	P. mexicana	KP700040	This study	N/A	N/A
468	Poecilia sp.	Ingroup	13450	STRI-NFC 13450	Río Macuelizo	Río Macuelizo	Río Coco	Atlantic	Nicaragua	N	13.6094	-86.4748	P. mexicana	Clade 8g	8	P. mexicana	KP700029	This study	N/A	N/A
469	Poecilia sp.	Ingroup	13934	STRI-NFC 13934	Río El Cua	Río El Cua	Río Coco	Atlantic	Nicaragua	N	13.6736	-85.7639	P. mexicana	Clade 8g	8	P. mexicana	KP700041	This study	N/A	N/A
470	Poecilia sp.	Ingroup	168175	MLBM 168175	Unnamed trib. to Río Grande de Matagalpa, W of La Mora and slightly further W of La Dalia	Unnamed trib.	Río Grande de Matagalpa	Atlantic	Nicaragua	N	13.2206	-85.7263	P. mexicana	Clade 8g	8	P. mexicana	KP700245	This study	N/A	N/A
471	Poecilia sp.	Ingroup	168176	MLBM 168176	Unnamed trib. to Río Grande de Matagalpa, W of La Mora and slightly further W of La Dalia	Unnamed trib.	Río Grande de Matagalpa	Atlantic	Nicaragua	N	13.2206	-85.7263	P. mexicana	Clade 8g	8	P. mexicana	KP700246	This study	N/A	N/A
472	Poecilia sp.	Ingroup	168177	MLBM 168177	Unnamed trib. to Río Grande de Matagalpa, W of La Mora and slightly further W of La Dalia	Unnamed trib.	Río Grande de Matagalpa	Atlantic	Nicaragua	N	13.2206	-85.7263	P. mexicana	Clade 8g	8	P. mexicana	KP700247	This study	N/A	N/A
473	Poecilia sp.	Ingroup	168178	MLBM 168178	Unnamed trib. to Río Grande de Matagalpa, W of La Mora and slightly further W of La Dalia	Unnamed trib.	Río Grande de Matagalpa	Atlantic	Nicaragua	N	13.2206	-85.7263	P. mexicana	Clade 8g	8	P. mexicana	KP700248	This study	N/A	N/A
474	Poecilia sp.	Ingroup	168179	MLBM 168179	Unnamed trib. to Río Grande de Matagalpa, W of La Mora and slightly further W of La Dalia	Unnamed trib.	Río Grande de Matagalpa	Atlantic	Nicaragua	N	13.2206	-85.7263	P. mexicana	Clade 8g	8	P. mexicana	KP700249	This study	N/A	N/A
475	Poecilia sp.	Ingroup	168180	MLBM 168180	Unnamed trib. to Río Grande de Matagalpa, W of La Mora and slightly further W of La Dalia	Unnamed trib.	Río Grande de Matagalpa	Atlantic	Nicaragua	N	13.2206	-85.7263	P. mexicana	Clade 8g	8	P. mexicana	KP700250	This study	N/A	N/A
476	Poecilia sp.	Ingroup	168181	MLBM 168181	Unnamed trib. to Río Grande de Matagalpa, W of La Mora and slightly further W of La Dalia	Unnamed trib.	Río Grande de Matagalpa	Atlantic	Nicaragua	N	13.2206	-85.7263	P. mexicana	Clade 8g	8	P. mexicana	KP700251	This study	N/A	N/A
477	Poecilia sp.	Ingroup	168182	MLBM 168182	Unnamed trib. to Río Grande de Matagalpa, W of La Mora and slightly further W of La Dalia	Unnamed trib.	Río Grande de Matagalpa	Atlantic	Nicaragua	N	13.2206	-85.7263	P. mexicana	Clade 8g	8	P. mexicana	KP700252	This study	N/A	N/A
478	Poecilia sp.	Ingroup	14041	STRI-NFC 14041	Río Juan Blanco	Río Juan Blanco	Río Coco	Atlantic	Nicaragua	N	13.7711	-85.6483	P. mexicana	Clade 8g	8	P. mexicana	KP700053	This study	N/A	N/A
479	Poecilia sp.	Ingroup	14042	STRI-NFC 14042	Río Juan Blanco	Río Juan Blanco	Río Coco	Atlantic	Nicaragua	N	13.7711	-85.6483	P. mexicana	Clade 8g	8	P. mexicana	KP700054	This study	N/A	N/A
480	Poecilia sp.	Ingroup	14043	STRI-NFC 14043	Río Juan Blanco	Río Juan Blanco	Río Coco	Atlantic	Nicaragua	N	13.7711	-85.6483	P. mexicana	Clade 8g	8	P. mexicana	KP700055	This study	N/A	N/A
481	Poecilia sp.	Ingroup	13986	STRI-NFC 13986	Río Orosal	Río Orosal	Río Coco	Atlantic	Nicaragua	N	13.3334	-86.2042	P. mexicana	Clade 8g	8	P. mexicana	KP700048	This study	N/A	N/A
482	Poecilia sp.	Ingroup	13987	STRI-NFC 13987	Río Orosal	Río Orosal	Río Coco	Atlantic	Nicaragua	N	13.3334	-86.2042	P. mexicana	Clade 8g	8	P. mexicana	KP700049	This study	N/A	N/A
483	Poecilia mexicana	Ingroup	13887	STRI-NFC 13887	Río Pantasma	Río Pantasma	Río Coco	Atlantic	Nicaragua	N	13.3416	-85.9564	P. mexicana	Clade 8g	8	P. mexicana	KP700037	This study	N/A	N/A
484	Poecilia sp.	Ingroup	13998	STRI-NFC 13998	Río Milan	Río Milan	Río Coco	Atlantic	Nicaragua	N	13.4247	-85.985	P. mexicana	Clade 8g	8	P. mexicana	KP700052	This study	N/A	N/A
485	Poecilia sp.	Ingroup	13456	STRI-NFC 13456	Río Macuelizo	Río Macuelizo	Río Coco	Atlantic	Nicaragua	N	13.6094	-86.4748	P. mexicana	Clade 8g	8	P. mexicana	KP700031	This study	N/A	N/A
486	Poecilia gillii	Ingroup	1118	STRI-NFC 1118	Río Anton	Río Anton	Río Anton	Pacific	Panama	Pan	8.3968	-80.2585	P. mexicana	Clade 8h	8	P. mexicana	KP699794	This study	N/A	N/A
487	Poecilia gillii	Ingroup	1119	STRI-NFC 1119	Río Anton	Río Anton	Río Anton	Pacific	Panama	Pan	8.3968	-80.2585	P. mexicana	Clade 8h	8	P. mexicana	KP699795	This study	N/A	N/A
488	Poecilia gillii	Ingroup	17120	STRI-NFC 17120	Quebrada El Nance, trib. to Río Santa Maria	Quebrada El Nance	Río Santa Maria	Pacific	Panama	Pan	8.41322	-82.048	P. mexicana	Clade 8h	8	P. mexicana	KP700153	This study	N/A	N/A
489	Poecilia gillii	Ingroup	18683	STRI-NFC 18683	Quebrada Chiriquisito	Quebrada Chiriquisito	Río Chiriqui	Pacific	Panama	Pan	8.68803	-82.2917	P. mexicana	Clade 8h	8	P. mexicana	KP700160	This study	N/A	N/A
490	Poecilia gillii	Ingroup	16045	STRI-NFC 16045	Río Guasimo	Río Guasimo	Río Miguel de la Borda	Atlantic	Panama	Pan	8.99133	-80.2743	P. mexicana	Clade 8h	8	P. mexicana	KP700099	This study	N/A	N/A
491	Poecilia gillii	Ingroup	15863	STRI-NFC 15863	Río Cardenas	Río Cardenas	Río Grande	Pacific	Panama	Pan	9.00117	-79.5728	P. mexicana	Clade 8h	8	P. mexicana	KP700096	This study	N/A	N/A
492	Poecilia gillii	Ingroup	15864	STRI-NFC 15864	Río Cardenas	Río Cardenas	Río Grande	Pacific	Panama	Pan	9.00117	-79.5728	P. mexicana	Clade 8h	8	P. mexicana	KP700097	This study	N/A	N/A
493	Poecilia gillii	Ingroup	7417	STRI-NFC 7417	Quebrada Mandingo, Chagres	Quebrada Mandingo	Río Chagres	Atlantic	Panama	Pan	9.0253	-79.6989	P. mexicana	Clade 8h	8	P. mexicana	KP699865	This study	N/A	N/A
494	Poecilia gillii	Ingroup	7421	STRI-NFC 7421	Quebrada Mandingo, Chagres	Quebrada Mandingo	Río Chagres	Atlantic	Panama	Pan	9.0253	-79.6989	P. mexicana	Clade 8h	8	P. mexicana	KP699866	This study	N/A	N/A
495	Poecilia gillii	Ingroup	15281	STRI-NFC 15281	Río Miguel de la Borda	Río Miguel de la Borda	Río Miguel de la Borda	Atlantic	Panama	Pan	9.04114	-80.355	P. mexicana	Clade 8h	8	P. mexicana	KP700082	This study	N/A	N/A
496	Poecilia gillii	Ingroup	15271	STRI-NFC 15271	Quebrada Tolu	Quebrada Tolu	Río Miguel de la Borda	Atlantic	Panama	Pan	9.04114	-80.355	P. mexicana	Clade 8h	8	P. mexicana	KP700081	This study	N/A	N/A
497	Poecilia gillii	Ingroup	15423	STRI-NFC 15423	Quebrada Jobito	Quebrada Jobito	Río Indio	Atlantic	Panama	Pan	9.06394	-80.186	P. mexicana	Clade 8h	8	P. mexicana	KP700088	This study	N/A	N/A
498	Poecilia gillii	Ingroup	15424	STRI-NFC 15424	Quebrada Jobito	Quebrada Jobito	Río Indio	Atlantic	Panama	Pan	9.06394	-80.186	P. mexicana	Clade 8h	8	P. mexicana	KP700089	This study	N/A	N/A
499	Poecilia gillii	Ingroup	16810	STRI-NFC 16810	Río Caño Rey	Río Caño Rey	Río Miguel de la Borda	Atlantic	Panama	Pan	9.13358	-80.2942	P. mexicana	Clade 8h	8	P. mexicana	KP700144	This study	N/A	N/A
500	Poecilia gillii	Ingroup	16820	STRI-NFC 16820	Río Caño Rey	Río Caño Rey	Río Miguel de la Borda	Atlantic	Panama	Pan	9.13358	-80.2942	P. mexicana	Clade 8h	8	P. mexicana	KP700145	This study	N/A	N/A
501	Poecilia gillii	Ingroup	16414	STRI-NFC 16414	Stream between Sardinilla and Salamanca	Río Chagres	Río Chagres	Atlantic	Panama	Pan	9.32644	-79.6119	P. mexicana	Clade 8h	8	P. mexicana	KP700114	This study	N/A	N/A
502	Poecilia gillii	Ingroup	12442	STRI-NFC 12442	Quebrada on Almirante to Changuinola Rd	Río Changuinola	Río Changuinola	Atlantic	Panama	Pan	9.39686	-82.5006	P. mexicana	Clade 8h	8	P. mexicana	KP700009	This study	N/A	N/A
503	Poecilia gillii	Ingroup	9395	STRI-NFC 9395	Río Cuango	Río Cuango	Río Cuango	Atlantic	Panama	Pan	9.5182	-79.2848	P. mexicana	Clade 8h	8	P. mexicana	KP699985	This study	N/A	N/A
504	Poecilia gillii	Ingroup	2956	STRI-NFC 2956	Río Cascajal ~5 km E of Portobelo	Río Cascajal	Río Cascajal	Atlantic	Panama	Pan	9.54642	-79.6063	P. mexicana	Clade 8h	8	P. mexicana	KP699826	This study	N/A	N/A
505	Poecilia gillii	Ingroup	4533	STRI-NFC 4533	Río Cascajal ~2.5 km E of Portobelo	Río Cascajal	Río Cascajal	Atlantic	Panama	Pan	9.54722	-79.6304	P. mexicana	Clade 8h	8	P. mexicana	KP699842	This study	N/A	N/A
506	Poecilia gillii	Ingroup	4534	STRI-NFC 4534	Río Cascajal ~2.5 km E of Portobelo	Río Cascajal	Río Cascajal	Atlantic	Panama	Pan	9.54722	-79.6304	P. mexicana	Clade 8h	8	P. mexicana	KP699843	This study	N/A	N/A
507	Poecilia gillii	Ingroup	4536	STRI-NFC 4536	Río Cascajal ~2.5 km E of Portobelo	Río Cascajal	Río Cascajal	Atlantic	Panama	Pan	9.54722	-79.6304	P. mexicana	Clade 8h	8	P. mexicana	KP699844	This study	N/A	N/A
508	Poecilia gillii	Ingroup	12609	STRI-NFC 12609	Río Cascajal ~2.5 km E of Portobelo	Río Cascajal	Río Cascajal	Atlantic	Panama	Pan	9.54722	-79.604	P. mexicana	Clade 8h	8	P. mexicana	KP700014	This study	N/A	N/A
509	Poecilia gillii	Ingroup	12610	STRI-NFC 12610	Río Cascajal ~2.5 km E of Portobelo	Río Cascajal	Río Cascajal	Atlantic	Panama	Pan	9.54722	-79.604	P. mexicana	Clade 8h	8	P. mexicana	KP700015	This study	N/A	N/A
510	Poecilia gillii	Ingroup	12614	STRI-NFC 12614	Río Cascajal ~2.5 km E of Portobelo	Río Cascajal	Río Cascajal	Atlantic	Panama	Pan	9.54722	-79.604	P. mexicana	Clade 8h	8	P. mexicana	KP700016	This study	N/A	N/A
511	Poecilia gillii	Ingroup	9020	STRI-NFC 9020	Río Cuango, ~2 km SW of Playa Chiquita	Río Cuango	Río Cuango	Atlantic	Panama	Pan	9.5508	-79.3092	P. mexicana	Clade 8h	8	P. mexicana	KP699983	This study	N/A	N/A
512	Poecilia gillii	Ingroup	17945	STRI-NFC 17945	Río Zahino (Río Viento Frio) ~2.5 km W of Palenque	Río Zahino	Río Zahino	Atlantic	Panama	Pan	9.57056	-79.3825	P. mexicana	Clade 8h	8	P. mexicana	KP700154	This study	N/A	N/A
513	Poecilia gillii	Ingroup	8355	STRI-NFC 8355	Río Ulúa at Ulúa / Cucuyagua	Río Ulúa	Río Ulúa	Atlantic	Honduras	Hon	14.651	-88.8814	P. mexicana	Clade 8h	8	P. mexicana	KP699914	This study	N/A	N/A
514	Poecilia gillii	Ingroup	8358	STRI-NFC 8358	Río Ulúa at Ulúa / Cucuyagua	Río Ulúa	Río Ulúa	Atlantic	Honduras	Hon	14.651	-88.8814	P. mexicana	Clade 8h	8	P. mexicana	KP699917	This study	N/A	N/A
515	Poecilia gillii	Ingroup	8365	STRI-NFC 8365	Río Tio Higuito, trib. to Río Motagua, at cuenca near Higuito	Río Motagua	Río Motagua	Atlantic	Honduras	Hon	14.8394	-89.1682	P. mexicana	Clade 8h	8	P. mexicana	KP699921	This study	N/A	N/A
516	Poecilia gillii	Ingroup	11162	STRI-NFC 11162	Quebrada El Nance, trib. to Río Santa Maria	Río Santa Maria	Río Santa Maria	Pacific	Panama	Pan	8.41317	-81.0485	P. mexicana	Clade 8h	8	P. mexicana	KP699995	This study	KP700447	This study
517	Poecilia gillii	Ingroup	16843	STRI-NFC 16843	Quebrada Jobito	Quebrada Jobito	Río Indio	Atlantic	Panama	Pan	9.06356	-80.188	P. mexicana	Clade 8h	8	P. mexicana	KP700147	This study	N/A	N/A
518	Poecilia gillii	Ingroup	16809	STRI-NFC 16809	Río Caño Rey	Río Caño Rey	Río Miguel de la Borda	Atlantic	Panama	Pan	9.13358	-80.2942	P. mexicana	Clade 8h	8	P. mexicana	KP700143	This study	N/A	N/A
519	Poecilia gillii	Ingroup	16823	STRI-NFC 16823	Río Caño Rey	Río Caño Rey	Río Miguel de la Borda	Atlantic	Panama	Pan	9.13358	-80.2942	P. mexicana	Clade 8h	8	P. mexicana	KP700146	This study	N/A	N/A
520	Poecilia gillii	Ingroup	16723	STRI-NFC 16723	Río Membrillar	Río Membrillar	Río Indio	Atlantic	Panama	Pan	9.17389	-80.185	P. mexicana	Clade 8h	8	P. mexicana	KP700136	This study	N/A	N/A
521	Poecilia gillii	Ingroup	16149	STRI-NFC 16149	Quebrada Congal	Quebrada Congal	Río Indio	Atlantic	Panama	Pan	8.91411	-80.1341	P. mexicana	Clade 8h	8	P. mexicana	KP700104	This study	N/A	N/A
522	Poecilia gillii	Ingroup	16123	STRI-NFC 16123	Quebrada Los Uveros	Quebrada Los Uveros	Río Indio	Atlantic	Panama	Pan	8.94719	-80.1382	P. mexicana	Clade 8h	8	P. mexicana	KP700102	This study	KP700454	This study
523	Poecilia gillii	Ingroup	15445	STRI-NFC 15445	Río Guasimo	Río Guasimo	Río Miguel de la Borda	Atlantic	Panama	Pan	8.99125	-80.2744	P. mexicana	Clade 8h	8	P. mexicana	KP700090	This study	N/A	N/A
524	Poecilia gillii	Ingroup	15446	STRI-NFC 15446	Río Guasimo	Río Guasimo	Río Miguel de la Borda	Atlantic	Panama	Pan	8.99125	-80.2744	P. mexicana	Clade 8h	8	P. mexicana	KP700091	This study	KP700451	This study
525	Poecilia gillii	Ingroup	16043	STRI-NFC 16043	Río Guasimo	Río Guasimo	Río Miguel de la Borda	Atlantic	Panama	Pan	8.99133	-80.2743	P. mexicana	Clade 8h	8	P. mexicana	KP700098	This study	N/A	N/A
526	Poecilia gillii	Ingroup	6803	STRI-NFC 6803	Old Gamboa Rd. Creek	Old Gamboa Rd. Creek	Río Chagres	Atlantic	Panama	Pan	9.11	-79.68	P. mexicana	Clade 8h	8	P. mexicana	KP699854	This study	KP700429	This study
527	Poecilia gillii	Ingroup	16722	STRI-NFC 16722	Río Membrillar	Río Membrillar	Río Indio	Atlantic	Panama	Pan	9.17389	-80.185	P. mexicana	Clade 8h	8	P. mexicana	KP700135	This study	N/A	N/A
528	Poecilia gillii	Ingroup	11203	STRI-NFC 11203	Río Mamoni	Río Mamoni	Río Bayano	Pacific	Panama	Pan	9.22361	-79.0922	P. mexicana	Clade 8h	8	P. mexicana	KP699996	This study	N/A	N/A
529	Poecilia gillii	Ingroup	16781	STRI-NFC 16781	Quebrada en Mateo, at Pueblo Nuevo near Palmas Bellas	Río Lagarto	Río Lagarto	Atlantic	Panama	Pan	9.22581	-80.0859	P. mexicana	Clade 8h	8	P. mexicana	KP700137	This study	N/A	N/A
530	Poecilia gillii	Ingroup	16782	STRI-NFC 16782	Quebrada en Mateo, at Pueblo Nuevo near Palmas Bellas	Río Lagarto	Río Lagarto	Atlantic	Panama	Pan	9.22581	-80.0859	P. mexicana	Clade 8h	8	P. mexicana	KP700138	This study	N/A	N/A
531	Poecilia gillii	Ingroup	16783	STRI-NFC 16783	Quebrada en Mateo, at Pueblo Nuevo near Palmas Bellas	Río Lagarto	Río Lagarto	Atlantic	Panama	Pan	9.22581	-80.0859	P. mexicana	Clade 8h	8	P. mexicana	KP700139	This study	N/A	N/A
532	Poecilia gillii	Ingroup	16784	STRI-NFC 16784	Quebrada en Mateo, at Pueblo Nuevo near Palmas Bellas	Río Lagarto	Río Lagarto	Atlantic	Panama	Pan	9.22581	-80.0859	P. mexicana	Clade 8h	8	P. mexicana	KP700140	This study	KP700457	This study
533	Poecilia gillii	Ingroup	16785	STRI-NFC 16785	Quebrada en Mateo, at Pueblo Nuevo near Palmas Bellas	Río Lagarto	Río Lagarto	Atlantic	Panama	Pan	9.22581	-80.0859	P. mexicana	Clade 8h	8	P. mexicana	KP700141	This study	N/A	N/A
534	Poecilia gillii	Ingroup	18720	STRI-NFC 18720	Río Mensabé, Azuero Peninsula	Río Mensabé	Río Salado	Pacific	Panama	Pan	7.70497	-80.2781	P. mexicana	Clade 8i	8	P. mexicana	KP700162	This study	KP700458	This study
535	Poecilia gillii	Ingroup	18801	STRI-NFC 18801	Quebrada Garay at Rambála-Almirante Rd, near Isla Pastores, Bocas del Toro	Quebrada Garay	Ensenada Grande	Atlantic	Panama	Pan	9.19575	-82.3431	P. mexicana	Clade 8i	8	P. mexicana	KP700167	This study	N/A	N/A
536	Poecilia gillii	Ingroup	16977	STRI-NFC 16977	2 quebradas before Big Creek - Isla Colón, Bocas del Toro	Laguna Chiriqui	Atlantic Ocean	Atlantic	Panama	Pan	9.35711	-82.2532	P. mexicana	Clade 8i	8	P. mexicana	KP700151	This study	N/A	N/A
537	Poecilia gillii	Ingroup	6885	STRI-NFC 6885	Río Calovebora	Río Calovebora	Río Calovebora	Atlantic	Panama	Pan	8.74778	-81.2231	P. mexicana	Clade 8i	8	P. mexicana	KP699858	This study	N/A	N/A
538	Poecilia gillii	Ingroup	6888	STRI-NFC 6888	Río Calovebora	Río Calovebora	Río Calovebora	Atlantic	Panama	Pan	8.74778	-81.2231	P. mexicana	Clade 8i	8	P. mexicana	KP699860	This study	N/A	N/A
539	Poecilia gillii	Ingroup	6889	STRI-NFC 6889	Río Calovebora	Río Calovebora	Río Calovebora	Atlantic	Panama	Pan	8.74778	-81.2231	P. mexicana	Clade 8i	8	P. mexicana	KP699861	This study	N/A	N/A
540	Poecilia gillii	Ingroup	6890	STRI-NFC 6890	Río Calovebora	Río Calovebora	Río Calovebora	Atlantic	Panama	Pan	8.74778	-81.2231	P. mexicana	Clade 8i	8	P. mexicana	KP699862	This study	N/A	N/A
541	Poecilia gillii	Ingroup	PG707.02	MLBM 235181	Unnamed lagoon, trib. to Río Bananito, ~11.2 km SE of Limon on CR Hwy 32	Río Bananito	Río Bananito	Atlantic	Costa Rica	CR	9.89258	-82.9723	P. mexicana	Clade 8i	8	P. mexicana	FJ446234	Lee & Johnson (2009)	N/A	N/A
542	Poecilia gillii	Ingroup	PG707.03	MLBM 235384	Unnamed lagoon, trib. to Río Bananito, ~11.2 km SE of Limon on CR Hwy 32	Río Bananito	Río Bananito	Atlantic	Costa Rica	CR	9.89258	-82.9723	P. mexicana	Clade 8i	8	P. mexicana	FJ446235	Lee & Johnson (2009)	N/A	N/A
543	Poecilia gillii	Ingroup	PG707.04	MLBM 235385	Unnamed lagoon, trib. to Río Bananito, ~11.2 km SE of Limon on CR Hwy 32	Río Bananito	Río Bananito	Atlantic	Costa Rica	CR	9.89258	-82.9723	P. mexicana	Clade 8i	8	P. mexicana	FJ446236	Lee & Johnson (2009)	N/A	N/A
544	Poecilia gillii	Ingroup	PG707.06	MLBM 235387	Unnamed lagoon, trib. to Río Bananito, ~11.2 km SE of Limon on CR Hwy 32	Río Bananito	Río Bananito	Atlantic	Costa Rica	CR	9.89258	-82.9723	P. mexicana	Clade 8i	8	P. mexicana	FJ446238	Lee & Johnson (2009)	N/A	N/A
545	Poecilia gillii	Ingroup	PG707.07	MLBM 235388	Unnamed lagoon, trib. to Río Bananito, ~11.2 km SE of Limon on CR Hwy 32	Río Bananito	Río Bananito	Atlantic	Costa Rica	CR	9.89258	-82.9723	P. mexicana	Clade 8i	8	P. mexicana	FJ446239	Lee & Johnson (2009)	N/A	N/A
546	Poecilia gillii	Ingroup	PG707.08	MLBM 235389	Unnamed lagoon, trib. to Río Bananito, ~11.2 km SE of Limon on CR Hwy 32	Río Bananito	Río Bananito	Atlantic	Costa Rica	CR	9.89258	-82.9723	P. mexicana	Clade 8i	8	P. mexicana	FJ446240	Lee & Johnson (2009)	N/A	N/A
547	Poecilia gillii	Ingroup	1291	STRI-NFC 1291	Río Sixaola, ~6 km SE of Bribri, CR, 1 km S of CR Hwy 36	Río Sixaola	Río Sixaola	Atlantic	Costa Rica	CR	9.59872	-82.8025	P. mexicana	Clade 8i	8	P. mexicana	KP699802	This study	KP700422	This study
548	Poecilia gillii	Ingroup	PG706.01	MLBM 235178	Río Hatillo Viejo	Río Carbon	Río Sixaola	Atlantic	Costa Rica	CR	9.62312	-82.8552	P. mexicana	Clade 8i	8	P. mexicana	FJ446225	Lee & Johnson (2009)	N/A	N/A
549	Poecilia gillii	Ingroup	PG706.04	MLBM 235379	Río Hatillo Viejo	Río Carbon	Río Sixaola	Atlantic	Costa Rica	CR	9.62312	-82.8552	P. mexicana	Clade 8i	8	P. mexicana	FJ446228	Lee & Johnson (2009)	N/A	N/A
550	Poecilia gillii	Ingroup	PG706.05	MLBM 235380	Río Hatillo Viejo	Río Carbon	Río Sixaola	Atlantic	Costa Rica	CR	9.62312	-82.8552	P. mexicana	Clade 8i	8	P. mexicana	FJ446229	Lee & Johnson (2009)	N/A	N/A
551	Poecilia gillii	Ingroup	PG706.06	MLBM 235381	Río Hatillo Viejo	Río Carbon	Río Sixaola	Atlantic	Costa Rica	CR	9.62312	-82.8552	P. mexicana	Clade 8i	8	P. mexicana	FJ446230	Lee & Johnson (2009)	N/A	N/A
552	Poecilia gillii	Ingroup	PG706.07	MLBM 235382	Río Hatillo Viejo	Río Carbon	Río Sixaola	Atlantic	Costa Rica	CR	9.62312	-82.8552	P. mexicana	Clade 8i	8	P. mexicana	FJ446231	Lee & Johnson (2009)	N/A	N/A
553	Poecilia gillii	Ingroup	PG704.01	MLBM 235176	Unnamed trib. to Río Sixaola, ~3 km NE of Bribri, CR, on CR Hwy 36	Río Sixaola	Río Sixaola	Atlantic	Costa Rica	CR	9.63203	-82.8192	P. mexicana	Clade 8i	8	P. mexicana	FJ446217	Lee & Johnson (2009)	N/A	N/A
554	Poecilia gillii	Ingroup	PG704.02	MLBM 235177	Unnamed trib. to Río Sixaola, ~3 km NE of Bribri, CR, on CR Hwy 36	Río Sixaola	Río Sixaola	Atlantic	Costa Rica	CR	9.63203	-82.8192	P. mexicana	Clade 8i	8	P. mexicana	FJ446218	Lee & Johnson (2009)	KP700505	This study
555	Poecilia gillii	Ingroup	PG704.03	MLBM 235372	Unnamed trib. to Río Sixaola, ~3 km NE of Bribri, CR, on CR Hwy 36	Río Sixaola	Río Sixaola	Atlantic	Costa Rica	CR	9.63203	-82.8192	P. mexicana	Clade 8i	8	P. mexicana	FJ446219	Lee & Johnson (2009)	N/A	N/A
556	Poecilia gillii	Ingroup	PG704.04	MLBM 235373	Unnamed trib. to Río Sixaola, ~3 km NE of Bribri, CR, on CR Hwy 36	Río Sixaola	Río Sixaola	Atlantic	Costa Rica	CR	9.63203	-82.8192	P. mexicana	Clade 8i	8	P. mexicana	FJ446220	Lee & Johnson (2009)	N/A	N/A
557	Poecilia gillii	Ingroup	PG704.05	MLBM 235374	Unnamed trib. to Río Sixaola, ~3 km NE of Bribri, CR, on CR Hwy 36	Río Sixaola	Río Sixaola	Atlantic	Costa Rica	CR	9.63203	-82.8192	P. mexicana	Clade 8i	8	P. mexicana	FJ446221	Lee & Johnson (2009)	N/A	N/A
558	Poecilia gillii	Ingroup	PG704.06	MLBM 235375	Unnamed trib. to Río Sixaola, ~3 km NE of Bribri, CR, on CR Hwy 36	Río Sixaola	Río Sixaola	Atlantic	Costa Rica	CR	9.63203	-82.8192	P. mexicana	Clade 8i	8	P. mexicana	FJ446222	Lee & Johnson (2009)	N/A	N/A
559	Poecilia gillii	Ingroup	PG704.07	MLBM 235376	Unnamed trib. to Río Sixaola, ~3 km NE of Bribri, CR, on CR Hwy 36	Río Sixaola	Río Sixaola	Atlantic	Costa Rica	CR	9.63203	-82.8192	P. mexicana	Clade 8i	8	P. mexicana	FJ446223	Lee & Johnson (2009)	N/A	N/A
560	Poecilia gillii	Ingroup	PG704.08	MLBM 235377	Unnamed trib. to Río Sixaola, ~3 km NE of Bribri, CR, on CR Hwy 36	Río Sixaola	Río Sixaola	Atlantic	Costa Rica	CR	9.63203	-82.8192	P. mexicana	Clade 8i	8	P. mexicana	FJ446224	Lee & Johnson (2009)	N/A	N/A
561	Poecilia gillii	Ingroup	PG707.01	MLBM 235180	Unnamed lagoon, trib. to Río Bananito, ~11.2 km SE of Limon on CR Hwy 32	Río Bananito	Río Bananito	Atlantic	Costa Rica	CR	9.89258	-82.9723	P. mexicana	Clade 8i	8	P. mexicana	FJ446233	Lee & Johnson (2009)	N/A	N/A
562	Poecilia gillii	Ingroup	PG707.05	MLBM 235386	Unnamed lagoon, trib. to Río Bananito, ~11.2 km SE of Limon on CR Hwy 32	Río Bananito	Río Bananito	Atlantic	Costa Rica	CR	9.89258	-82.9723	P. mexicana	Clade 8i	8	P. mexicana	FJ446237	Lee & Johnson (2009)	N/A	N/A
563	Poecilia gillii	Ingroup	PG701.01	MLBM 235184	Trib. to Río Reventazon at Rd. 232 across from Angostura Lagoon	Río Reventazon	Río Parismina	Atlantic	Costa Rica	CR	9.8723	-83.6332	P. mexicana	Clade 8j	8	P. mexicana	FJ446207	Lee & Johnson (2009)	N/A	N/A
564	Poecilia gillii	Ingroup	PG701.02	MLBM 235185	Trib. to Río Reventazon at Rd. 232 across from Angostura Lagoon	Río Reventazon	Río Parismina	Atlantic	Costa Rica	CR	9.8723	-83.6332	P. mexicana	Clade 8j	8	P. mexicana	FJ446208	Lee & Johnson (2009)	KP700502	This study
565	Poecilia gillii	Ingroup	PG701.03	MLBM 235366	Trib. to Río Reventazon at Rd. 232 across from Angostura Lagoon	Río Reventazon	Río Parismina	Atlantic	Costa Rica	CR	9.8723	-83.6332	P. mexicana	Clade 8j	8	P. mexicana	FJ446209	Lee & Johnson (2009)	N/A	N/A
566	Poecilia gillii	Ingroup	PG701.04	MLBM 235367	Trib. to Río Reventazon at Rd. 232 across from Angostura Lagoon	Río Reventazon	Río Parismina	Atlantic	Costa Rica	CR	9.8723	-83.6332	P. mexicana	Clade 8j	8	P. mexicana	FJ446210	Lee & Johnson (2009)	N/A	N/A
567	Poecilia gillii	Ingroup	PG804.01	MLBM 129607	Río Tarcoles at CR Rd 137, W of San Juan de Mata (El Llano)	Río Tarcoles	Río Grande de Tarcoles	Pacific	Costa Rica	CR	9.8798	-84.5278	P. mexicana	Clade 8k	8	P. mexicana	FJ446369	Lee & Johnson (2009)	N/A	N/A
568	Poecilia sp.	Ingroup	168801	MLBM 168801	Río Diriá at CA1 approx. 2-3 km N of Santa Cruz, Nicoya Peninsula	Río Diriá	Río Diriá	Pacific	Costa Rica	CR	10.2668	-85.5926	P. mexicana	Clade 8k	8	P. mexicana	KP700271	This study	N/A	N/A
569	Poecilia gillii	Ingroup	PG614.02	MLBM 119013	Río Santa Rosa, trib. to Río Corobici, which drains into Río Tenorio/Bebedero	Río Bebedero	Río Tempisque	Pacific	Costa Rica	CR	10.4611	-85.0744	P. mexicana	Clade 8k	8	P. mexicana	FJ446199	Lee & Johnson (2009)	N/A	N/A
570	Poecilia sp.	Ingroup	167896	MLBM 167896	Río Sardinal at Sardinal, on Rd 151 approx. 5 km from 21	Río Sardinal	Río Tempisque	Pacific	Costa Rica	CR	10.5151	-85.6517	P. mexicana	Clade 8k	8	P. mexicana	KP700178	This study	N/A	N/A
571	Poecilia sp.	Ingroup	167901	MLBM 167901	Río Sardinal at Sardinal, on Rd 151 approx. 5 km from 21	Río Sardinal	Río Tempisque	Pacific	Costa Rica	CR	10.5151	-85.6517	P. mexicana	Clade 8k	8	P. mexicana	KP700183	This study	N/A	N/A
572	Poecilia sp.	Ingroup	168793	MLBM 168793	Río Tempisque on Rd between Guardia and Comunidad, Nicoya Peninsula	Río Tempisque	Río Tempisque	Pacific	Costa Rica	CR	10.5722	-85.3919	P. mexicana	Clade 8k	8	P. mexicana	KP700264	This study	N/A	N/A
573	Poecilia sp.	Ingroup	168794	MLBM 168794	Río Tempisque on Rd between Guardia and Comunidad, Nicoya Peninsula	Río Tempisque	Río Tempisque	Pacific	Costa Rica	CR	10.5722	-85.3919	P. mexicana	Clade 8k	8	P. mexicana	KP700265	This study	N/A	N/A
574	Poecilia sp.	Ingroup	168797	MLBM 168797	Río Tempisque on Rd between Guardia and Comunidad, Nicoya Peninsula	Río Tempisque	Río Tempisque	Pacific	Costa Rica	CR	10.5722	-85.3919	P. mexicana	Clade 8k	8	P. mexicana	KP700268	This study	N/A	N/A
575	Poecilia sp.	Ingroup	167890	MLBM 167890	Río Liberia at outskirts of Liberia, Costa Rica	Río Liberia	Río Tempisque	Pacific	Costa Rica	CR	10.6274	-85.4341	P. mexicana	Clade 8k	8	P. mexicana	KP700172	This study	N/A	N/A
576	Poecilia sp.	Ingroup	167891	MLBM 167891	Río Liberia at outskirts of Liberia, Costa Rica	Río Liberia	Río Tempisque	Pacific	Costa Rica	CR	10.6274	-85.4341	P. mexicana	Clade 8k	8	P. mexicana	KP700173	This study	N/A	N/A
577	Poecilia sp.	Ingroup	167893	MLBM 167893	Río Liberia at outskirts of Liberia, Costa Rica	Río Liberia	Río Tempisque	Pacific	Costa Rica	CR	10.6274	-85.4341	P. mexicana	Clade 8k	8	P. mexicana	KP700175	This study	N/A	N/A
578	Poecilia gillii	Ingroup	PG724.01	MLBM 235208	Río Irigary at Pan American Hwy (CA 1), at Irigary	Río Irigary	Río Tempisque	Pacific	Costa Rica	CR	10.7234	-85.5104	P. mexicana	Clade 8k	8	P. mexicana	FJ446333	Lee & Johnson (2009)	N/A	N/A
579	Poecilia gillii	Ingroup	PG724.02	MLBM 235209	Río Irigary at Pan American Hwy (CA 1), at Irigary	Río Irigary	Río Tempisque	Pacific	Costa Rica	CR	10.7234	-85.5104	P. mexicana	Clade 8k	8	P. mexicana	FJ446334	Lee & Johnson (2009)	N/A	N/A
580	Poecilia gillii	Ingroup	PG724.06	MLBM 235459	Río Irigary at Pan American Hwy (CA 1), at Irigary	Río Irigary	Río Tempisque	Pacific	Costa Rica	CR	10.7234	-85.5104	P. mexicana	Clade 8k	8	P. mexicana	FJ446338	Lee & Johnson (2009)	N/A	N/A
581	Poecilia gillii	Ingroup	PG724.09	MLBM 235462	Río Irigary at Pan American Hwy (CA 1), at Irigary	Río Irigary	Río Tempisque	Pacific	Costa Rica	CR	10.7234	-85.5104	P. mexicana	Clade 8k	8	P. mexicana	FJ446341	Lee & Johnson (2009)	N/A	N/A
582	Poecilia gillii	Ingroup	PG724.10	MLBM 235463	Río Irigary at Pan American Hwy (CA 1), at Irigary	Río Irigary	Río Tempisque	Pacific	Costa Rica	CR	10.7234	-85.5104	P. mexicana	Clade 8k	8	P. mexicana	FJ446342	Lee & Johnson (2009)	N/A	N/A
583	Poecilia gillii	Ingroup	PG724.11	MLBM 235464	Río Irigary at Pan American Hwy (CA 1), at Irigary	Río Irigary	Río Tempisque	Pacific	Costa Rica	CR	10.7234	-85.5104	P. mexicana	Clade 8k	8	P. mexicana	FJ446343	Lee & Johnson (2009)	N/A	N/A
584	Poecilia gillii	Ingroup	PG724.12	MLBM 235465	Río Irigary at Pan American Hwy (CA 1), at Irigary	Río Irigary	Río Tempisque	Pacific	Costa Rica	CR	10.7234	-85.5104	P. mexicana	Clade 8k	8	P. mexicana	FJ446344	Lee & Johnson (2009)	KP700511	This study
585	Poecilia gillii	Ingroup	PG617.01	MLBM 118871	Río Javilla, trib. to Río Cañas	Río Bebedero	Río Tempisque	Pacific	Costa Rica	CR	10.3721	-85.0974	P. mexicana	Clade 8k	8	P. mexicana	FJ446203	Lee & Johnson (2009)	N/A	N/A
586	Poecilia gillii	Ingroup	PG612.01	MLBM 118866	Río Chiquito, trib. to Lake Arenal	Río San Carlos	Río San Juan	Atlantic	Costa Rica	CR	10.4377	-84.8681	P. mexicana	Clade 8k	8	P. mexicana	FJ446193	Lee & Johnson (2009)	N/A	N/A
587	Poecilia gillii	Ingroup	PG603.01	MLBM 118859	Lake Arenal	Río San Carlos	Río San Juan	Atlantic	Costa Rica	CR	10.4721	-84.7693	P. mexicana	Clade 8k	8	P. mexicana	FJ446178	Lee & Johnson (2009)	N/A	N/A
588	Poecilia gillii	Ingroup	PG608.03	MLBM 119009	Río Sabalito, trib. to Lake Arenal (west side),1.5 km SE of Sabalito on CR Rd 142	Río San Carlos	Río San Juan	Atlantic	Costa Rica	CR	10.5486	-84.9808	P. mexicana	Clade 8k	8	P. mexicana	FJ446182	Lee & Johnson (2009)	KP700498	This study
589	Poecilia gillii	Ingroup	PG608.04	MLBM 235356	Río Sabalito, trib. to Lake Arenal (west side),1.5 km SE of Sabalito on CR Rd 142	Río San Carlos	Río San Juan	Atlantic	Costa Rica	CR	10.5486	-84.9808	P. mexicana	Clade 8k	8	P. mexicana	FJ446183	Lee & Johnson (2009)	N/A	N/A
590	Poecilia gillii	Ingroup	PG612.02	MLBM 118867	Río Chiquito	Río San Carlos	Río San Juan	Atlantic	Costa Rica	CR	10.4377	-84.8681	P. mexicana	Clade 8k	8	P. mexicana	FJ446194	Lee & Johnson (2009)	N/A	N/A
591	Poecilia gillii	Ingroup	PG608.01	MLBM 118860	Río Sabalito, trib. to Lake Arenal (west side),1.5 km SE of Sabalito on CR Rd 142	Río San Carlos	Río San Juan	Atlantic	Costa Rica	CR	10.5486	-84.9808	P. mexicana	Clade 8k	8	P. mexicana	FJ446180	Lee & Johnson (2009)	N/A	N/A
592	Poecilia gillii	Ingroup	PG608.02	MLBM 118861	Río Sabalito, trib. to Lake Arenal (west side),1.5 km SE of Sabalito on CR Rd 142	Río San Carlos	Río San Juan	Atlantic	Costa Rica	CR	10.5486	-84.9808	P. mexicana	Clade 8k	8	P. mexicana	FJ446181	Lee & Johnson (2009)	KP700497	This study
593	Poecilia gillii	Ingroup	PG608.05	MLBM 235357	Río Sabalito, trib. to Lake Arenal (west side),1.5 km SE of Sabalito on CR Rd 142	Río San Carlos	Río San Juan	Atlantic	Costa Rica	CR	10.5486	-84.9808	P. mexicana	Clade 8k	8	P. mexicana	FJ446184	Lee & Johnson (2009)	N/A	N/A
594	Poecilia sp.	Ingroup	168696	MLBM 168696	Río Cabuyo at unnamed province Rd to la Reserva Biologica Lomas Bardudal	Río Cabuyo	Río Tempisque	Pacific	Costa Rica	CR	10.4896	-85.3855	P. mexicana	Clade 8k	8	P. mexicana	KP700253	This study	N/A	N/A
595	Poecilia gillii	Ingroup	PG724.14	MLBM 235467	Río Irigary at Pan American Hwy (CA 1), at Irigary	Río Irigary	Río Tempisque	Pacific	Costa Rica	CR	10.7234	-85.5104	P. mexicana	Clade 8k	8	P. mexicana	FJ446346	Lee & Johnson (2009)	N/A	N/A
596	Poecilia gillii	Ingroup	PG809.04	MLBM 129616	Río Rosales	Río Tarcoles	Río Grande de Tarcoles	Pacific	Costa Rica	CR	10.0298	-84.3258	P. mexicana	Clade 8k	8	P. mexicana	FJ446394	Lee & Johnson (2009)	N/A	N/A
597	Poecilia gillii	Ingroup	PG703.02	MLBM 235187	Río Herediana at CR Hwy 32, approximately 3 km northwest of Siquirres	Río Herediana	Río Parismina	Atlantic	Costa Rica	CR	10.1242	-83.5562	P. mexicana	Clade 8k	8	P. mexicana	FJ446213	Lee & Johnson (2009)	N/A	N/A
598	Poecilia gillii	Ingroup	PG703.03	MLBM 235369	Río Herediana at CR Hwy 32, approximately 3 km northwest of Siquirres	Río Herediana	Río Parismina	Atlantic	Costa Rica	CR	10.1242	-83.5562	P. mexicana	Clade 8k	8	P. mexicana	FJ446214	Lee & Johnson (2009)	N/A	N/A
599	Poecilia gillii	Ingroup	PG710.01	MLBM 235396	Río Parismina	Río Parismina	Río Parismina	Atlantic	Costa Rica	CR	10.1977	-83.5687	P. mexicana	Clade 8k	8	P. mexicana	FJ446249	Lee & Johnson (2009)	N/A	N/A
600	Poecilia gillii	Ingroup	PG710.02	MLBM 235397	Río Parismina	Río Parismina	Río Parismina	Atlantic	Costa Rica	CR	10.1977	-83.5687	P. mexicana	Clade 8k	8	P. mexicana	FJ446250	Lee & Johnson (2009)	N/A	N/A
601	Poecilia gillii	Ingroup	PG710.03	MLBM 235398	Río Parismina	Río Parismina	Río Parismina	Atlantic	Costa Rica	CR	10.1977	-83.5687	P. mexicana	Clade 8k	8	P. mexicana	FJ446251	Lee & Johnson (2009)	N/A	N/A
602	Poecilia gillii	Ingroup	PG710.04	MLBM 235399	Río Parismina	Río Parismina	Río Parismina	Atlantic	Costa Rica	CR	10.1977	-83.5687	P. mexicana	Clade 8k	8	P. mexicana	FJ446252	Lee & Johnson (2009)	N/A	N/A
603	Poecilia gillii	Ingroup	PG710.05	MLBM 235400	Río Parismina	Río Parismina	Río Parismina	Atlantic	Costa Rica	CR	10.1977	-83.5687	P. mexicana	Clade 8k	8	P. mexicana	FJ446253	Lee & Johnson (2009)	N/A	N/A
604	Poecilia gillii	Ingroup	PG710.06	MLBM 235401	Río Parismina	Río Parismina	Río Parismina	Atlantic	Costa Rica	CR	10.1977	-83.5687	P. mexicana	Clade 8k	8	P. mexicana	FJ446254	Lee & Johnson (2009)	N/A	N/A
605	Poecilia gillii	Ingroup	PG710.07	Lee & Johnson (2009)	Río Parismina	Río Parismina	Río Parismina	Atlantic	Costa Rica	CR	10.1977	-83.5687	P. mexicana	Clade 8k	8	P. mexicana	N/A	Lee & Johnson (2009)	N/A	N/A
606	Poecilia gillii	Ingroup	PG712.01	MLBM 235188	Río Tortuguero	Río Tortuguero	Río Tortuguero	Atlantic	Costa Rica	CR	10.2594	-83.8122	P. mexicana	Clade 8k	8	P. mexicana	FJ446256	Lee & Johnson (2009)	N/A	N/A
607	Poecilia gillii	Ingroup	PG712.02	MLBM 235189	Río Tortuguero	Río Tortuguero	Río Tortuguero	Atlantic	Costa Rica	CR	10.2594	-83.8122	P. mexicana	Clade 8k	8	P. mexicana	FJ446257	Lee & Johnson (2009)	N/A	N/A
608	Poecilia gillii	Ingroup	PG712.03	MLBM 235190	Río Tortuguero	Río Tortuguero	Río Tortuguero	Atlantic	Costa Rica	CR	10.2594	-83.8122	P. mexicana	Clade 8k	8	P. mexicana	FJ446258	Lee & Johnson (2009)	N/A	N/A
609	Poecilia gillii	Ingroup	PG712.05	MLBM 235402	Río Tortuguero	Río Tortuguero	Río Tortuguero	Atlantic	Costa Rica	CR	10.2594	-83.8122	P. mexicana	Clade 8k	8	P. mexicana	FJ446260	Lee & Johnson (2009)	N/A	N/A
610	Poecilia gillii	Ingroup	PG712.09	MLBM 235406	Río Tortuguero	Río Tortuguero	Río Tortuguero	Atlantic	Costa Rica	CR	10.2594	-83.8122	P. mexicana	Clade 8k	8	P. mexicana	FJ446264	Lee & Johnson (2009)	N/A	N/A
611	Poecilia gillii	Ingroup	PG712.11	MLBM 235408	Río Tortuguero	Río Tortuguero	Río Tortuguero	Atlantic	Costa Rica	CR	10.2594	-83.8122	P. mexicana	Clade 8k	8	P. mexicana	FJ446266	Lee & Johnson (2009)	N/A	N/A
612	Poecilia gillii	Ingroup	PG712.14	MLBM 235412	Río Tortuguero	Río Tortuguero	Río Tortuguero	Atlantic	Costa Rica	CR	10.2594	-83.8122	P. mexicana	Clade 8k	8	P. mexicana	FJ446269	Lee & Johnson (2009)	N/A	N/A
613	Poecilia gillii	Ingroup	PG712.04	MLBM 235191	Río Tortuguero	Río Tortuguero	Río Tortuguero	Atlantic	Costa Rica	CR	10.2594	-83.8122	P. mexicana	Clade 8k	8	P. mexicana	FJ446259	Lee & Johnson (2009)	N/A	N/A
614	Poecilia gillii	Ingroup	PG712.08	MLBM 235405	Río Tortuguero	Río Tortuguero	Río Tortuguero	Atlantic	Costa Rica	CR	10.2594	-83.8122	P. mexicana	Clade 8k	8	P. mexicana	FJ446263	Lee & Johnson (2009)	N/A	N/A
615	Poecilia gillii	Ingroup	PG712.10	MLBM 235407	Río Tortuguero	Río Tortuguero	Río Tortuguero	Atlantic	Costa Rica	CR	10.2594	-83.8122	P. mexicana	Clade 8k	8	P. mexicana	FJ446265	Lee & Johnson (2009)	N/A	N/A
616	Poecilia gillii	Ingroup	PG712.15	MLBM 235413	Río Tortuguero	Río Tortuguero	Río Tortuguero	Atlantic	Costa Rica	CR	10.2594	-83.8122	P. mexicana	Clade 8k	8	P. mexicana	FJ446270	Lee & Johnson (2009)	N/A	N/A
617	Poecilia gillii	Ingroup	PG712.16	Lee & Johnson (2009)	Río Tortuguero	Río Tortuguero	Río Tortuguero	Atlantic	Costa Rica	CR	10.2594	-83.8122	P. mexicana	Clade 8k	8	P. mexicana	FJ446270	Lee & Johnson (2009)	N/A	N/A
618	Poecilia gillii	Ingroup	1246	STRI-NFC 1246	Río Sarapiqui	Río Sarapiqui	Río San Juan	Atlantic	Costa Rica	CR	10.4723	-83.992	P. mexicana	Clade 8k	8	P. mexicana	KP699801	This study	KP700421	This study
619	Poecilia gillii	Ingroup	PG713.01	MLBM 235192	Río Sarapiqui off Rd. 505 approximately 7.2 km northwest of Puerto Viejo de Sarapiqui	Río Sarapiqui	Río San Juan	Atlantic	Costa Rica	CR	10.5245	-84.0313	P. mexicana	Clade 8k	8	P. mexicana	FJ446271	Lee & Johnson (2009)	N/A	N/A
620	Poecilia gillii	Ingroup	PG713.07	MLBM 235416	Río Sarapiqui off Rd. 505 approximately 7.2 km northwest of Puerto Viejo de Sarapiqui	Río Sarapiqui	Río San Juan	Atlantic	Costa Rica	CR	10.5245	-84.0313	P. mexicana	Clade 8k	8	P. mexicana	FJ446277	Lee & Johnson (2009)	N/A	N/A
621	Poecilia gillii	Ingroup	PG713.11	MLBM 235420	Río Sarapiqui off Rd. 505 approximately 7.2 km northwest of Puerto Viejo de Sarapiqui	Río Sarapiqui	Río San Juan	Atlantic	Costa Rica	CR	10.5245	-84.0313	P. mexicana	Clade 8k	8	P. mexicana	FJ446281	Lee & Johnson (2009)	N/A	N/A
622	Poecilia gillii	Ingroup	PG712.06	MLBM 235403	Río Tortuguero	Río Tortuguero	Río Tortuguero	Atlantic	Costa Rica	CR	10.2594	-83.8122	P. mexicana	Clade 8k	8	P. mexicana	FJ446261	Lee & Johnson (2009)	N/A	N/A
623	Poecilia gillii	Ingroup	PG636.01	Lee & Johnson (2009)	Río Isla Grande	Río Sarapiqui	Río San Juan	Atlantic	Costa Rica	CR	10.393	-83.9682	P. mexicana	Clade 8k	8	P. mexicana	N/A	Lee & Johnson (2009)	N/A	N/A
624	Poecilia gillii	Ingroup	PG611.01	MLBM 118864	Quebrada Homiguera, trib. to Río Tenorio	Río Bebedero	Río Tempisque	Pacific	Costa Rica	CR	10.6909	-85.0837	P. mexicana	Clade 8l	8	P. mexicana	FJ446188	Lee & Johnson (2009)	N/A	N/A
625	Poecilia gillii	Ingroup	PG611.04	MLBM 235127	Quebrada Homiguera, trib. to Río Tenorio	Río Bebedero	Río Tempisque	Pacific	Costa Rica	CR	10.6909	-85.0837	P. mexicana	Clade 8l	8	P. mexicana	FJ446191	Lee & Johnson (2009)	KP700501	This study
626	Poecilia gillii	Ingroup	PG703.01	MLBM 235186	Río Herediana at CR Hwy 32, approximately 3 km northwest of Siquirres	Río Herediana	Río Parismina	Atlantic	Costa Rica	CR	10.1242	-83.5562	P. mexicana	Clade 8l	8	P. mexicana	FJ446212	Lee & Johnson (2009)	KP700504	This study
627	Poecilia gillii	Ingroup	PG703.05	MLBM 235371	Río Herediana at CR Hwy 32, approximately 3 km northwest of Siquirres	Río Herediana	Río Parismina	Atlantic	Costa Rica	CR	10.1242	-83.5562	P. mexicana	Clade 8l	8	P. mexicana	FJ446216	Lee & Johnson (2009)	N/A	N/A
628	Poecilia gillii	Ingroup	PG808.02	MLBM 129629	Río Congo at Pan American Hwy (CA 1), ~2.2 km E of Matapalo (drains to Golfo de Nicoya)	Río Barranca	Río Barranca	Pacific	Costa Rica	CR	10.24	-84.9917	P. mexicana	Clade 8m	8	P. mexicana	FJ446386	Lee & Johnson (2009)	N/A	N/A
629	Poecilia sp.	Ingroup	168806	MLBM 168806	Río Diriá at CA1 approx. 2-3 km N of Santa Cruz, Nicoya Peninsula	Río Diriá	Río Diriá	Pacific	Costa Rica	CR	10.2668	-85.5926	P. mexicana	Clade 8m	8	P. mexicana	KP700276	This study	N/A	N/A
630	Poecilia gillii	Ingroup	PG722.01	MLBM 235212	Río Marole at CR Hwy 21, Nicoya Peninsula (drains to Golfo de Nicoya)	Río Marole	Río Marole	Pacific	Costa Rica	CR	10.0583	-85.262	P. mexicana	Clade 8m	8	P. mexicana	FJ446316	Lee & Johnson (2009)	N/A	N/A
631	Poecilia gillii	Ingroup	PG722.02	MLBM 235213	Río Marole at CR Hwy 21, Nicoya Peninsula (drains to Golfo de Nicoya)	Río Marole	Río Marole	Pacific	Costa Rica	CR	10.0583	-85.262	P. mexicana	Clade 8m	8	P. mexicana	FJ446317	Lee & Johnson (2009)	N/A	N/A
632	Poecilia gillii	Ingroup	PG722.04	MLBM 235215	Río Marole at CR Hwy 21, Nicoya Peninsula (drains to Golfo de Nicoya)	Río Marole	Río Marole	Pacific	Costa Rica	CR	10.0583	-85.262	P. mexicana	Clade 8m	8	P. mexicana	FJ446319	Lee & Johnson (2009)	N/A	N/A
633	Poecilia gillii	Ingroup	PG722.05	MLBM 235445	Río Marole at CR Hwy 21, Nicoya Peninsula (drains to Golfo de Nicoya)	Río Marole	Río Marole	Pacific	Costa Rica	CR	10.0583	-85.262	P. mexicana	Clade 8m	8	P. mexicana	FJ446320	Lee & Johnson (2009)	N/A	N/A
634	Poecilia gillii	Ingroup	PG722.07	MLBM 235447	Río Marole at CR Hwy 21, Nicoya Peninsula (drains to Golfo de Nicoya)	Río Marole	Río Marole	Pacific	Costa Rica	CR	10.0583	-85.262	P. mexicana	Clade 8m	8	P. mexicana	FJ446322	Lee & Johnson (2009)	N/A	N/A
635	Poecilia gillii	Ingroup	PG722.08	MLBM 235448	Río Marole at CR Hwy 21, Nicoya Peninsula (drains to Golfo de Nicoya)	Río Marole	Río Marole	Pacific	Costa Rica	CR	10.0583	-85.262	P. mexicana	Clade 8m	8	P. mexicana	FJ446323	Lee & Johnson (2009)	N/A	N/A
636	Poecilia gillii	Ingroup	PG722.09	MLBM 235449	Río Marole at CR Hwy 21, Nicoya Peninsula (drains to Golfo de Nicoya)	Río Marole	Río Marole	Pacific	Costa Rica	CR	10.0583	-85.262	P. mexicana	Clade 8m	8	P. mexicana	FJ446324	Lee & Johnson (2009)	N/A	N/A
637	Poecilia gillii	Ingroup	PG722.10	MLBM 235450	Río Marole at CR Hwy 21, Nicoya Peninsula (drains to Golfo de Nicoya)	Río Marole	Río Marole	Pacific	Costa Rica	CR	10.0583	-85.262	P. mexicana	Clade 8m	8	P. mexicana	FJ446325	Lee & Johnson (2009)	KP700509	This study
638	Poecilia gillii	Ingroup	PG722.11	MLBM 235451	Río Marole at CR Hwy 21, Nicoya Peninsula (drains to Golfo de Nicoya)	Río Marole	Río Marole	Pacific	Costa Rica	CR	10.0583	-85.262	P. mexicana	Clade 8m	8	P. mexicana	FJ446326	Lee & Johnson (2009)	N/A	N/A
639	Poecilia gillii	Ingroup	PG722.12	MLBM 235452	Río Marole at CR Hwy 21, Nicoya Peninsula (drains to Golfo de Nicoya)	Río Marole	Río Marole	Pacific	Costa Rica	CR	10.0583	-85.262	P. mexicana	Clade 8m	8	P. mexicana	FJ446327	Lee & Johnson (2009)	N/A	N/A
640	Poecilia gillii	Ingroup	PG722.13	MLBM 235453	Río Marole at CR Hwy 21, Nicoya Peninsula (drains to Golfo de Nicoya)	Río Marole	Río Marole	Pacific	Costa Rica	CR	10.0583	-85.262	P. mexicana	Clade 8m	8	P. mexicana	FJ446328	Lee & Johnson (2009)	N/A	N/A
641	Poecilia gillii	Ingroup	PG722.14	MLBM 235454	Río Marole at CR Hwy 21, Nicoya Peninsula (drains to Golfo de Nicoya)	Río Marole	Río Marole	Pacific	Costa Rica	CR	10.0583	-85.262	P. mexicana	Clade 8m	8	P. mexicana	FJ446329	Lee & Johnson (2009)	N/A	N/A
642	Poecilia gillii	Ingroup	PG722.15	MLBM 235455	Río Marole at CR Hwy 21, Nicoya Peninsula (drains to Golfo de Nicoya)	Río Marole	Río Marole	Pacific	Costa Rica	CR	10.0583	-85.262	P. mexicana	Clade 8m	8	P. mexicana	FJ446330	Lee & Johnson (2009)	N/A	N/A
643	Poecilia gillii	Ingroup	PG722.16	MLBM 235456	Río Marole at CR Hwy 21, Nicoya Peninsula (drains to Golfo de Nicoya)	Río Marole	Río Marole	Pacific	Costa Rica	CR	10.0583	-85.262	P. mexicana	Clade 8m	8	P. mexicana	FJ446331	Lee & Johnson (2009)	N/A	N/A
644	Poecilia gillii	Ingroup	PG809.02	MLBM 129614	Río Rosales	Río Tarcoles	Río Grande de Tarcoles	Pacific	Costa Rica	CR	10.0298	-84.3258	P. mexicana	Clade 8m	8	P. mexicana	FJ446392	Lee & Johnson (2009)	N/A	N/A
645	Poecilia gillii	Ingroup	PG809.03	MLBM 129615	Río Rosales	Río Tarcoles	Río Grande de Tarcoles	Pacific	Costa Rica	CR	10.0298	-84.3258	P. mexicana	Clade 8m	8	P. mexicana	FJ446393	Lee & Johnson (2009)	N/A	N/A
646	Poecilia sp.	Ingroup	168802	MLBM 168802	Río Diriá at CA1 approx. 2-3 km N of Santa Cruz, Nicoya Peninsula	Río Diriá	Río Diriá	Pacific	Costa Rica	CR	10.2668	-85.5926	P. mexicana	Clade 8m	8	P. mexicana	KP700272	This study	N/A	N/A
647	Poecilia sp.	Ingroup	168803	MLBM 168803	Río Diriá at CA1 approx. 2-3 km N of Santa Cruz, Nicoya Peninsula	Río Diriá	Río Diriá	Pacific	Costa Rica	CR	10.2668	-85.5926	P. mexicana	Clade 8m	8	P. mexicana	KP700273	This study	N/A	N/A
648	Poecilia gillii	Ingroup	1205	STRI-NFC 1205	Río Cañas (trib. to Río Tenorio) appxoimately 2 km southeast of town of Bebedero, ~10 km west of CA1	Río Bebedero	Río Tempisque	Pacific	Costa Rica	CR	10.3483	-85.1688	P. mexicana	Clade 8m	8	P. mexicana	KP699796	This study	KP700418	This study
649	Poecilia sp.	Ingroup	168698	MLBM 168698	Río Cabuyo at unnamed province Rd to la Reserva Biologica Lomas Bardudal	Río Cabuyo	Río Tempisque	Pacific	Costa Rica	CR	10.4896	-85.3855	P. mexicana	Clade 8m	8	P. mexicana	KP700255	This study	N/A	N/A
650	Poecilia sp.	Ingroup	167895	MLBM 167895	Río Sardinal at Sardinal, on Rd 151 approx. 5 km from 21	Río Sardinal	Río Tempisque	Pacific	Costa Rica	CR	10.5151	-85.6517	P. mexicana	Clade 8m	8	P. mexicana	KP700177	This study	N/A	N/A
651	Poecilia sp.	Ingroup	167897	MLBM 167897	Río Sardinal at Sardinal, on Rd 151 approx. 5 km from 21	Río Sardinal	Río Tempisque	Pacific	Costa Rica	CR	10.5151	-85.6517	P. mexicana	Clade 8m	8	P. mexicana	KP700179	This study	N/A	N/A
652	Poecilia sp.	Ingroup	168792	MLBM 168792	Río Tempisque on Rd between Guardia and Comunidad, Nicoya Peninsula (Golfo de Nicoya)	Río Tempisque	Río Tempisque	Pacific	Costa Rica	CR	10.5722	-85.3919	P. mexicana	Clade 8m	8	P. mexicana	KP700263	This study	N/A	N/A
653	Poecilia sp.	Ingroup	168795	MLBM 168795	Río Tempisque on Rd between Guardia and Comunidad, Nicoya Peninsula (Golfo de Nicoya)	Río Tempisque	Río Tempisque	Pacific	Costa Rica	CR	10.5722	-85.3919	P. mexicana	Clade 8m	8	P. mexicana	KP700266	This study	N/A	N/A
654	Poecilia sp.	Ingroup	168798	MLBM 168798	Río Tempisque on Rd between Guardia and Comunidad, Nicoya Peninsula (Golfo de Nicoya)	Río Tempisque	Río Tempisque	Pacific	Costa Rica	CR	10.5722	-85.3919	P. mexicana	Clade 8m	8	P. mexicana	KP700269	This study	N/A	N/A
655	Poecilia gillii	Ingroup	PG722.06	MLBM 235446	Río Marole at CR Hwy 21, Nicoya Peninsula (Golfo de Nicoya)	Río Marole	Río Marole	Pacific	Costa Rica	CR	10.0583	-85.262	P. mexicana	Clade 8m	8	P. mexicana	FJ446321	Lee & Johnson (2009)	N/A	N/A
656	Poecilia sp.	Ingroup	168804	MLBM 168804	Río Diriá at CA1 approx. 2-3 km N of Santa Cruz, Nicoya Peninsula (Golfo de Nicoya)	Río Diriá	Río Diriá	Pacific	Costa Rica	CR	10.2668	-85.5926	P. mexicana	Clade 8m	8	P. mexicana	KP700274	This study	N/A	N/A
657	Poecilia gillii	Ingroup	PG617.02	MLBM 118872	Río Javilla, trib. to Río Cañas	Río Bebedero	Río Tempisque	Pacific	Costa Rica	CR	10.3721	-85.0974	P. mexicana	Clade 8m	8	P. mexicana	FJ446204	Lee & Johnson (2009)	N/A	N/A
658	Poecilia gillii	Ingroup	PG610.01	MLBM 118862	Small ditch at Hwy 927, trib. to Río Corobici	Río Bebedero	Río Tempisque	Pacific	Costa Rica	CR	10.6241	-85.0581	P. mexicana	Clade 8m	8	P. mexicana	FJ446185	Lee & Johnson (2009)	N/A	N/A
659	Poecilia gillii	Ingroup	PG610.02	MLBM 118863	Small ditch at Hwy 927, trib. to Río Corobici	Río Bebedero	Río Tempisque	Pacific	Costa Rica	CR	10.6241	-85.0581	P. mexicana	Clade 8m	8	P. mexicana	FJ446186	Lee & Johnson (2009)	N/A	N/A
660	Poecilia gillii	Ingroup	PG610.03	MLBM 119010	Small ditch at Hwy 927, trib. to Río Corobici	Río Bebedero	Río Tempisque	Pacific	Costa Rica	CR	10.6241	-85.0581	P. mexicana	Clade 8m	8	P. mexicana	FJ446187	Lee & Johnson (2009)	KP700499	This study
661	Poecilia gillii	Ingroup	PG611.02	MLBM 118865	Quebrada Homiguera, trib. to Río Tenorio	Río Bebedero	Río Tempisque	Pacific	Costa Rica	CR	10.6909	-85.0837	P. mexicana	clade 8m	8	P. mexicana	FJ446189	Lee & Johnson (2009)	N/A	N/A
662	Poecilia gillii	Ingroup	PG611.03	MLBM 119011	Quebrada Homiguera, trib. to Río Tenorio	Río Bebedero	Río Tempisque	Pacific	Costa Rica	CR	10.6909	-85.0837	P. mexicana	clade 8m	8	P. mexicana	FJ446190	Lee & Johnson (2009)	KP700500	This study
663	Poecilia gillii	Ingroup	PG724.13	MLBM 235466	Río Irigary at Pan American Hwy (CA 1), at Irigary	Río Irigary	Río Tempisque	Pacific	Costa Rica	CR	10.7234	-85.5104	P. mexicana	Clade 8m	8	P. mexicana	FJ446345	Lee & Johnson (2009)	N/A	N/A
664	Poecilia gillii	Ingroup	PG809.01	MLBM 129613	Río Rosales	Río Tarcoles	Río Grande de Tarcoles	Pacific	Costa Rica	CR	10.0298	-84.3258	P. mexicana	Clade 8m	8	P. mexicana	FJ446391	Lee & Johnson (2009)	N/A	N/A
665	Poecilia gillii	Ingroup	PG612.05	MLBM 235355	Río Chiquito, trib. to Lake Arenal	Río San Carlos	Río San Juan	Atlantic	Costa Rica	CR	10.4377	-84.8681	P. mexicana	Clade 8m	8	P. mexicana	FJ446197	Lee & Johnson (2009)	N/A	N/A
666	Poecilia gillii	Ingroup	PG603.02	MLBM 119008	Lake Arenal	Río San Carlos	Río San Juan	Atlantic	Costa Rica	CR	10.4721	-84.7693	P. mexicana	Clade 8m	8	P. mexicana	FJ446179	Lee & Johnson (2009)	N/A	N/A
667	Poecilia gillii	Ingroup	PG602.01	MLBM 118857	Río La Palma	Río San Carlos	Río San Juan	Atlantic	Costa Rica	CR	10.4987	-84.689	P. mexicana	Clade 8m	8	P. mexicana	FJ446175	Lee & Johnson (2009)	N/A	N/A
668	Poecilia gillii	Ingroup	PG602.02	MLBM 118858	Río La Palma	Río San Carlos	Río San Juan	Atlantic	Costa Rica	CR	10.4987	-84.689	P. mexicana	Clade 8m	8	P. mexicana	FJ446173	Lee & Johnson (2009)	N/A	N/A
669	Poecilia gillii	Ingroup	PG602.03	MLBM 119007	Río La Palma	Río San Carlos	Río San Juan	Atlantic	Costa Rica	CR	10.4987	-84.689	P. mexicana	Clade 8m	8	P. mexicana	FJ446174	Lee & Johnson (2009)	N/A	N/A
670	Poecilia gillii	Ingroup	PG602.04	MLBM 119773	Río La Palma	Río San Carlos	Río San Juan	Atlantic	Costa Rica	CR	10.4987	-84.689	P. mexicana	Clade 8m	8	P. mexicana	FJ446177	Lee & Johnson (2009)	N/A	N/A
671	Poecilia gillii	Ingroup	PG602.05	MLBM 119776	Río La Palma	Río San Carlos	Río San Juan	Atlantic	Costa Rica	CR	10.4987	-84.689	P. mexicana	Clade 8m	8	P. mexicana	FJ446176	Lee & Johnson (2009)	N/A	N/A
672	Poecilia gillii	Ingroup	PG713.04	MLBM 235195	Río Sarapiqui off Rd. 505 approximately 7.2 km northwest of Puerto Viejo de Sarapiqui	Río Sarapiqui	Río San Juan	Atlantic	Costa Rica	CR	10.5245	-84.0313	P. mexicana	Clade 8m	8	P. mexicana	FJ446274	Lee & Johnson (2009)	N/A	N/A
673	Poecilia gillii	Ingroup	PG715.01	MLBM 235196	Río Infiernito off dirt road, 3 km east of CR Hwy 35, after traveling approximately 6.5 km north of Boca Arenal	Río San Carlos	Río San Juan	Atlantic	Costa Rica	CR	10.618	-84.4842	P. mexicana	clade 8m	8	P. mexicana	FJ446284	Lee & Johnson (2009)	N/A	N/A
674	Poecilia gillii	Ingroup	PG715.02	MLBM 235197	Río Infiernito off dirt road, 3 km east of CR Hwy 35, after traveling approximately 6.5 km north of Boca Arenal	Río San Carlos	Río San Juan	Atlantic	Costa Rica	CR	10.618	-84.4842	P. mexicana	clade 8m	8	P. mexicana	FJ446285	Lee & Johnson (2009)	KP700508	This study
675	Poecilia gillii	Ingroup	PG715.03	MLBM 235423	Río Infiernito off dirt road, 3 km east of CR Hwy 35, after traveling approximately 6.5 km north of Boca Arenal	Río San Carlos	Río San Juan	Atlantic	Costa Rica	CR	10.618	-84.4842	P. mexicana	Clade 8m	8	P. mexicana	FJ446286	Lee & Johnson (2009)	N/A	N/A
676	Poecilia gillii	Ingroup	PG715.04	MLBM 235424	Río Infiernito off dirt road, 3 km east of CR Hwy 35, after traveling approximately 6.5 km north of Boca Arenal	Río San Carlos	Río San Juan	Atlantic	Costa Rica	CR	10.618	-84.4842	P. mexicana	Clade 8m	8	P. mexicana	FJ446287	Lee & Johnson (2009)	N/A	N/A
677	Poecilia gillii	Ingroup	PG715.05	MLBM 235425	Río Infiernito off dirt road, 3 km east of CR Hwy 35, after traveling approximately 6.5 km north of Boca Arenal	Río San Carlos	Río San Juan	Atlantic	Costa Rica	CR	10.618	-84.4842	P. mexicana	Clade 8m	8	P. mexicana	FJ446288	Lee & Johnson (2009)	N/A	N/A
678	Poecilia gillii	Ingroup	PG715.06	MLBM 235426	Río Infiernito off dirt road, 3 km east of CR Hwy 35, after traveling approximately 6.5 km north of Boca Arenal	Río San Carlos	Río San Juan	Atlantic	Costa Rica	CR	10.618	-84.4842	P. mexicana	Clade 8m	8	P. mexicana	FJ446289	Lee & Johnson (2009)	N/A	N/A
679	Poecilia gillii	Ingroup	PG715.07	MLBM 235427	Río Infiernito off dirt road, 3 km east of CR Hwy 35, after traveling approximately 6.5 km north of Boca Arenal	Río San Carlos	Río San Juan	Atlantic	Costa Rica	CR	10.618	-84.4842	P. mexicana	Clade 8m	8	P. mexicana	FJ446290	Lee & Johnson (2009)	N/A	N/A
680	Poecilia gillii	Ingroup	PG716.04	MLBM 235430	Río Chimurria	Río San Carlos	Río San Juan	Atlantic	Costa Rica	CR	10.7274	-84.5582	P. mexicana	clade 8m	8	P. mexicana	FJ446295	Lee & Johnson (2009)	N/A	N/A
681	Poecilia gillii	Ingroup	PG725.02	MLBM 235470	Río Sapoa just north of CR Hwy 4, approximately 2 km southeast of La Cruz	Lago Nicaragua	Río San Juan	Atlantic	Costa Rica	CR	11.0444	-85.6159	P. mexicana	Clade 8m	8	P. mexicana	FJ446349	Lee & Johnson (2009)	N/A	N/A
682	Poecilia gillii	Ingroup	PG725.03	MLBM 235471	Río Sapoa just north of CR Hwy 4, approximately 2 km southeast of La Cruz	Lago Nicaragua	Río San Juan	Atlantic	Costa Rica	CR	11.0444	-85.6159	P. mexicana	Clade 8m	8	P. mexicana	FJ446350	Lee & Johnson (2009)	N/A	N/A
683	Poecilia gillii	Ingroup	PG725.08	MLBM 235476	Río Sapoa just north of CR Hwy 4, approximately 2 km southeast of La Cruz	Lago Nicaragua	Río San Juan	Atlantic	Costa Rica	CR	11.0444	-85.6159	P. mexicana	Clade 8m	8	P. mexicana	FJ446355	Lee & Johnson (2009)	N/A	N/A
684	Poecilia sp.	Ingroup	168708	MLBM 168708	Unnamed trib. to Lake Nicaragua just E of mile marker km 238 on rd to San Miguelito, Chontales	Lago Nicaragua	Río San Juan	Atlantic	Nicaragua	N	11.5054	-84.8396	P. mexicana	Clade 8m	8	P. mexicana	KP700260	This study	N/A	N/A
685	Poecilia gillii	Ingroup	172539	MLBM 172539	Río Ochomogo	Lago Nicaragua	Río San Juan	Atlantic	Nicaragua	N	11.6566	-85.9732	P. mexicana	Clade 8m	8	P. mexicana	KP700321	This study	KP700473	This study
686	Poecilia gillii	Ingroup	172541	MLBM 172541	Río Ochomogo	Lago Nicaragua	Río San Juan	Atlantic	Nicaragua	N	11.6566	-85.9732	P. mexicana	Clade 8m	8	P. mexicana	KP700323	This study	KP700474	This study
687	Poecilia gillii	Ingroup	172542	MLBM 172542	Río Ochomogo	Lago Nicaragua	Río San Juan	Atlantic	Nicaragua	N	11.6566	-85.9732	P. mexicana	Clade 8m	8	P. mexicana	KP700324	This study	N/A	N/A
688	Poecilia gillii	Ingroup	172559	MLBM 172559	Unnamed drainage ditch trib. 1 km N of Ochomogo	Lago Nicaragua	Río San Juan	Atlantic	Nicaragua	N	11.6789	-85.9882	P. mexicana	Clade 8m	8	P. mexicana	KP700328	This study	N/A	N/A
689	Poecilia gillii	Ingroup	173680	MLBM 173680	Unnamed trib. to Lago Nicaragua	Lago Nicaragua	Río San Juan	Atlantic	Nicaragua	N	11.7492	-84.5582	P. mexicana	Clade 8m	8	P. mexicana	KP700368	This study	N/A	N/A
690	Poecilia gillii	Ingroup	173681	MLBM 173681	Unnamed trib. to Lago Nicaragua	Lago Nicaragua	Río San Juan	Atlantic	Nicaragua	N	11.7492	-84.5582	P. mexicana	Clade 8m	8	P. mexicana	KP700369	This study	KP700489	This study
691	Poecilia gillii	Ingroup	173682	MLBM 173682	Unnamed trib. to Lago Nicaragua	Lago Nicaragua	Río San Juan	Atlantic	Nicaragua	N	11.7492	-84.5582	P. mexicana	Clade 8m	8	P. mexicana	KP700370	This study	N/A	N/A
692	Poecilia gillii	Ingroup	173683	MLBM 173683	Unnamed trib. to Lago Nicaragua	Lago Nicaragua	Río San Juan	Atlantic	Nicaragua	N	11.7492	-84.5582	P. mexicana	Clade 8m	8	P. mexicana	KP700371	This study	N/A	N/A
693	Poecilia gillii	Ingroup	173684	MLBM 173684	Unnamed trib. to Lago Nicaragua	Lago Nicaragua	Río San Juan	Atlantic	Nicaragua	N	11.7492	-84.5582	P. mexicana	Clade 8m	8	P. mexicana	KP700372	This study	N/A	N/A
694	Poecilia gillii	Ingroup	173685	MLBM 173685	Unnamed trib. to Lago Nicaragua	Lago Nicaragua	Río San Juan	Atlantic	Nicaragua	N	11.7492	-84.5582	P. mexicana	Clade 8m	8	P. mexicana	KP700373	This study	N/A	N/A
695	Poecilia gillii	Ingroup	173960	MLBM 173960	Unnamed trib. to Río Ojucuapa at San Roque (Comarca Santa Marta) off unnamed road, ~2 km SW of Hwy 25	Lago Nicaragua	Río San Juan	Atlantic	Nicaragua	N	11.8294	-85.2048	P. mexicana	Clade 8m	8	P. mexicana	KP700375	This study	KP700490	This study
696	Poecilia gillii	Ingroup	173964	MLBM 173964	Unnamed trib. to Río Ojucuapa at San Roque (Comarca Santa Marta) off unnamed road, ~2 km SW of Hwy 25	Lago Nicaragua	Río San Juan	Atlantic	Nicaragua	N	11.8294	-85.2048	P. mexicana	Clade 8m	8	P. mexicana	KP700378	This study	KP700493	This study
697	Poecilia gillii	Ingroup	174109	MLBM 174109	Unnamed trib. to Río Ojucuapa at San Roque (Comarca Santa Marta) off unnamed road, ~2 km SW of Hwy 25	Lago Nicaragua	Río San Juan	Atlantic	Nicaragua	N	11.8799	-85.1316	P. mexicana	Clade 8m	8	P. mexicana	KP700380	This study	N/A	N/A
698	Poecilia gillii	Ingroup	174110	MLBM 174110	Unnamed trib. to Río Ojucuapa at San Roque (Comarca Santa Marta) off unnamed road, ~2 km SW of Hwy 25	Lago Nicaragua	Río San Juan	Atlantic	Nicaragua	N	11.8799	-85.1316	P. mexicana	Clade 8m	8	P. mexicana	KP700381	This study	N/A	N/A
699	Poecilia gillii	Ingroup	174111	MLBM 174111	Unnamed trib. to Río Ojucuapa at San Roque (Comarca Santa Marta) off unnamed road, ~2 km SW of Hwy 25	Lago Nicaragua	Río San Juan	Atlantic	Nicaragua	N	11.8799	-85.1316	P. mexicana	Clade 8m	8	P. mexicana	KP700382	This study	N/A	N/A
700	Poecilia gillii	Ingroup	174112	MLBM 174112	Unnamed trib. to Río Ojucuapa at San Roque (Comarca Santa Marta) off unnamed road, ~2 km SW of Hwy 25	Lago Nicaragua	Río San Juan	Atlantic	Nicaragua	N	11.8799	-85.1316	P. mexicana	Clade 8m	8	P. mexicana	KP700383	This study	N/A	N/A
701	Poecilia gillii	Ingroup	174113	MLBM 174113	Unnamed trib. to Río Ojucuapa at San Roque (Comarca Santa Marta) off unnamed road, ~2 km SW of Hwy 25	Lago Nicaragua	Río San Juan	Atlantic	Nicaragua	N	11.8799	-85.1316	P. mexicana	Clade 8m	8	P. mexicana	KP700384	This study	N/A	N/A
702	Poecilia gillii	Ingroup	174116	MLBM 174116	Unnamed trib. to Río Ojucuapa at San Roque (Comarca Santa Marta) off unnamed road, ~2 km SW of Hwy 25	Lago Nicaragua	Río San Juan	Atlantic	Nicaragua	N	11.8799	-85.1316	P. mexicana	Clade 8m	8	P. mexicana	KP700386	This study	N/A	N/A
703	Poecilia sp.	Ingroup	13666	STRI-NFC 13666	Río Espavel (afluente Río Chimalate)	Río Chimalate	Río Escondido	Atlantic	Nicaragua	N	12.0129	-84.6683	P. mexicana	Clade 8m	8	P. mexicana	KP700032	This study	N/A	N/A
704	Poecilia gillii	Ingroup	173271	MLBM 173271	Trib. to Río Mayales	Lago Nicaragua	Río San Juan	Atlantic	Nicaragua	N	12.0566	-85.4081	P. mexicana	Clade 8m	8	P. mexicana	KP700351	This study	KP700483	This study
705	Poecilia gillii	Ingroup	173272	MLBM 173272	Trib. to Río Mayales	Lago Nicaragua	Río San Juan	Atlantic	Nicaragua	N	12.0566	-85.4081	P. mexicana	clade 8m	8	P. mexicana	KP700352	This study	KP700484	This study
706	P. mexicana	Ingroup	167943	MLBM 167943	Unnamed trib. to Río Malacatoya at Teustepe, just off rd to Rama (Nica. 7), SW of Boaco	Lago Nicaragua	Río San Juan	Atlantic	Nicaragua	N	12.4183	-85.793	P. mexicana	Clade 8m	8	P. mexicana	KP700207	This study	N/A	N/A
707	P. mexicana	Ingroup	168899	MLBM 168899	Unnamed trib. to Río Malacatoya at Teustepe, just off rd to Rama (Nica. 7), SW of Boaco	Lago Nicaragua	Río San Juan	Atlantic	Nicaragua	N	12.4183	-85.793	P. mexicana	Clade 8m	8	P. mexicana	KP700304	This study	N/A	N/A
708	Poecilia gillii	Ingroup	174331	MLBM 174331	Trib. to Río Grande Viejo (Río Viejoio) at Nica Hwy 26 ~4.5 km NW of El Jocote (between Estelí and León)	Lago Managua	Río San Juan	Atlantic	Nicaragua	N	12.8932	-86.1791	P. mexicana	Clade 8m	8	P. mexicana	KP700398	This study	N/A	N/A
709	Poecilia sp.	Ingroup	168699	MLBM 168699	Río Cabuyo at unnamed province Rd to la Reserva Biologica Lomas Bardudal	Río Cabuyo	Río Tempisque	Pacific	Costa Rica	CR	10.4896	-85.3855	P. mexicana	Clade 8m	8	P. mexicana	KP700256	This study	N/A	N/A
710	Poecilia sp.	Ingroup	168796	MLBM 168796	Río Tempisque on Rd between Guardia and Comunidad, Nicoya Peninsula	Río Tempisque	Río Tempisque	Pacific	Costa Rica	CR	10.5722	-85.3919	P. mexicana	Clade 8m	8	P. mexicana	KP700267	This study	N/A	N/A
711	Poecilia sp.	Ingroup	167887	MLBM 167887	Río Liberia at outskirts of Liberia	Río Liberia	Río Tempisque	Pacific	Costa Rica	CR	10.6274	-85.4341	P. mexicana	Clade 8m	8	P. mexicana	KP700170	This study	N/A	N/A
712	Poecilia sp.	Ingroup	167888	MLBM 167888	Río Liberia at outskirts of Liberia	Río Liberia	Río Tempisque	Pacific	Costa Rica	CR	10.6274	-85.4341	P. mexicana	Clade 8m	8	P. mexicana	KP700171	This study	N/A	N/A
713	Poecilia sp.	Ingroup	167892	MLBM 167892	Río Liberia at outskirts of Liberia	Río Liberia	Río Tempisque	Pacific	Costa Rica	CR	10.6274	-85.4341	P. mexicana	Clade 8m	8	P. mexicana	KP700174	This study	N/A	N/A
714	Poecilia sp.	Ingroup	167894	MLBM 167894	Río Liberia at outskirts of Liberia	Río Liberia	Río Tempisque	Pacific	Costa Rica	CR	10.6274	-85.4341	P. mexicana	Clade 8m	8	P. mexicana	KP700176	This study	N/A	N/A
715	Poecilia gillii	Ingroup	PG724.03	MLBM 235210	Río Irigary at Pan American Hwy (CA 1), at Irigary	Río Irigary	Río Tempisque	Pacific	Costa Rica	CR	10.7234	-85.5104	P. mexicana	Clade 8m	8	P. mexicana	FJ446335	Lee & Johnson (2009)	N/A	N/A
716	Poecilia gillii	Ingroup	PG724.04	MLBM 235457	Río Irigary at Pan American Hwy (CA 1), at Irigary	Río Irigary	Río Tempisque	Pacific	Costa Rica	CR	10.7234	-85.5104	P. mexicana	Clade 8m	8	P. mexicana	FJ446336	Lee & Johnson (2009)	N/A	N/A
717	Poecilia gillii	Ingroup	PG724.05	MLBM 235458	Río Irigary at Pan American Hwy (CA 1), at Irigary	Río Irigary	Río Tempisque	Pacific	Costa Rica	CR	10.7234	-85.5104	P. mexicana	Clade 8m	8	P. mexicana	FJ446337	Lee & Johnson (2009)	KP700510	This study
718	Poecilia gillii	Ingroup	PG724.07	MLBM 235460	Río Irigary at Pan American Hwy (CA 1), at Irigary	Río Irigary	Río Tempisque	Pacific	Costa Rica	CR	10.7234	-85.5104	P. mexicana	Clade 8m	8	P. mexicana	FJ446339	Lee & Johnson (2009)	N/A	N/A
719	Poecilia gillii	Ingroup	PG724.08	MLBM 235461	Río Irigary at Pan American Hwy (CA 1), at Irigary	Río Irigary	Río Tempisque	Pacific	Costa Rica	CR	10.7234	-85.5104	P. mexicana	Clade 8m	8	P. mexicana	FJ446340	Lee & Johnson (2009)	N/A	N/A
720	Poecilia gillii	Ingroup	PG724.15	MLBM 235468	Río Irigary at Pan American Hwy (CA 1), at Irigary	Río Irigary	Río Tempisque	Pacific	Costa Rica	CR	10.7234	-85.5104	P. mexicana	Clade 8m	8	P. mexicana	FJ446347	Lee & Johnson (2009)	N/A	N/A
721	Poecilia gillii	Ingroup	PG722.03	MLBM 235214	Río Marole at CR Hwy 21, Nicoya Peninsula (drains to Golfo de Nicoya)	Río Marole	Río Marole	Pacific	Costa Rica	CR	10.0583	-85.262	P. mexicana	Clade 8m	8	P. mexicana	FJ446318	Lee & Johnson (2009)	N/A	N/A
722	Poecilia gillii	Ingroup	PG806.01	MLBM 129618	Río Centeno at Rd. 131, approximately 1.6 km west of San Mateo	Río Centeno	Río Barranca	Pacific	Costa Rica	CR	9.94132	-84.5389	P. mexicana	Clade 8m	8	P. mexicana	FJ446375	Lee & Johnson (2009)	N/A	N/A
723	Poecilia gillii	Ingroup	PG806.03	MLBM 129620	Río Centeno at Rd. 131, approximately 1.6 km west of San Mateo	Río Centeno	Río Barranca	Pacific	Costa Rica	CR	9.94132	-84.5389	P. mexicana	Clade 8m	8	P. mexicana	FJ446377	Lee & Johnson (2009)	N/A	N/A
724	Poecilia gillii	Ingroup	PG806.04	MLBM 129621	Río Centeno at Rd. 131, approximately 1.6 km west of San Mateo	Río Centeno	Río Barranca	Pacific	Costa Rica	CR	9.94132	-84.5389	P. mexicana	Clade 8m	8	P. mexicana	FJ446378	Lee & Johnson (2009)	KP700514	This study
725	Poecilia gillii	Ingroup	PG806.05	MLBM 129622	Río Centeno at Rd. 131, approximately 1.6 km west of San Mateo	Río Centeno	Río Barranca	Pacific	Costa Rica	CR	9.94132	-84.5389	P. mexicana	Clade 8m	8	P. mexicana	FJ446379	Lee & Johnson (2009)	N/A	N/A
726	Poecilia gillii	Ingroup	PG806.02	MLBM 129619	Río Centeno at Rd. 131, approximately 1.6 km west of San Mateo	Río Centeno	Río Barranca	Pacific	Costa Rica	CR	9.94132	-84.5389	P. mexicana	Clade 8m	8	P. mexicana	FJ446376	Lee & Johnson (2009)	N/A	N/A
727	Poecilia gillii	Ingroup	PG712.07	MLBM 235404	Río Tortuguero	Río Tortuguero	Tortuguero	Atlantic	Costa Rica	CR	10.2594	-83.8122	P. mexicana	Clade 8m	8	P. mexicana	FJ446262	Lee & Johnson (2009)	N/A	N/A
728	Poecilia gillii	Ingroup	PG712.12	MLBM 235409	Río Tortuguero	Río Tortuguero	Tortuguero	Atlantic	Costa Rica	CR	10.2594	-83.8122	P. mexicana	Clade 8m	8	P. mexicana	FJ446267	Lee & Johnson (2009)	N/A	N/A
729	Poecilia gillii	Ingroup	3141	STRI-NFC 3141	Unnamed trib. to Río Santa Maria, Azuero Peninsula	Unnamed trib.	Río Santa Maria	Pacific	Panama	Pan	8.35278	-80.7992	P. mexicana	Clade 8m	8	P. mexicana	KP699827	This study	N/A	N/A
730	Poecilia gillii	Ingroup	3148	STRI-NFC 3148	Unnamed trib. to Río Santa Maria, Azuero Peninsula	Unnamed trib.	Río Santa Maria	Pacific	Panama	Pan	8.35278	-80.7992	P. mexicana	Clade 8m	8	P. mexicana	KP699828	This study	N/A	N/A
731	Poecilia gillii	Ingroup	111	STRI-NFC 111	Río Chiriqui Viejo	Río Chiriqui Viejo	Río Chiriqui Viejo	Pacific	Panama	Pan	8.76443	-82.8271	P. mexicana	Clade 8m	8	P. mexicana	KP699788	This study	N/A	N/A
732	Poecilia gillii	Ingroup	9788	STRI-NFC 9788	Río Moreno (road to Coclesito)	Río Moreno	Río Cocle del Norte	Atlantic	Panama	Pan	8.7745	-80.5278	P. mexicana	Clade 8m	8	P. mexicana	KP699991	This study	N/A	N/A
733	Poecilia gillii	Ingroup	4796	STRI-NFC 4796	Río Caimito, Quebrada Mano de Piedra	Quebrada Mano de Piedra	Río Caimito	Pacific	Panama	Pan	8.85083	-79.9606	P. mexicana	Clade 8m	8	P. mexicana	KP699845	This study	N/A	N/A
734	Poecilia gillii	Ingroup	4799	STRI-NFC 4799	Río Caimito, Quebrada Mano de Piedra	Quebrada Mano de Piedra	Río Caimito	Pacific	Panama	Pan	8.85083	-79.9606	P. mexicana	Clade 8m	8	P. mexicana	KP699846	This study	N/A	N/A
735	Poecilia gillii	Ingroup	18792	STRI-NFC 18792	Quebrada Traicionera	Río Uyama	Laguna de Chiriqui	Atlantic	Panama	Pan	9.13892	-82.3069	P. mexicana	Clade 8m	8	P. mexicana	KP700166	This study	N/A	N/A
736	Poecilia gillii	Ingroup	18812	STRI-NFC 18812	Quebrada Garay	Quebrada Garay	Ensenada Grande	Atlantic	Panama	Pan	9.19575	-82.3431	P. mexicana	Clade 8m	8	P. mexicana	KP700168	This study	N/A	N/A
737	Poecilia gillii	Ingroup	PG708.06	MLBM 235393	Río Toro, trib. to Río Matina, just off Costa Rica Hwy 32 approximately 24 km west of Limon	Río Pascual	Río Matina	Atlantic	Costa Rica	CR	10.0168	-83.2102	P. mexicana	Clade 8m	8	P. mexicana	FJ446246	Lee & Johnson (2009)	N/A	N/A
738	Poecilia gillii	Ingroup	PG708.07	MLBM 235394	Río Toro, trib. to Río Matina, just off Costa Rica Hwy 32 approximately 24 km west of Limon	Río Pascual	Río Matina	Atlantic	Costa Rica	CR	10.0168	-83.2102	P. mexicana	Clade 8m	8	P. mexicana	FJ446247	Lee & Johnson (2009)	N/A	N/A
739	Poecilia gillii	Ingroup	PG708.08	MLBM 235395	Río Toro, trib. to Río Matina, just off Costa Rica Hwy 32 approximately 24 km west of Limon	Río Pascual	Río Matina	Atlantic	Costa Rica	CR	10.0168	-83.2102	P. mexicana	Clade 8m	8	P. mexicana	FJ446248	Lee & Johnson (2009)	N/A	N/A
740	Poecilia sp.	Ingroup	168888	MLBM 168888	Río Barbilla at province rd just W of B-Line, a few km W of the rd to Matina (dirt rd, off NE side of big rd to Puerto Limon)	Río Barbilla	Río Matina	Atlantic	Costa Rica	CR	10.0442	-83.3338	P. mexicana	Clade 8m	8	P. mexicana	KP700293	This study	N/A	N/A
741	Poecilia sp.	Ingroup	168889	MLBM 168889	Río Barbilla at province rd just W of B-Line, a few km W of the rd to Matina (dirt rd, off NE side of big rd to Puerto Limon)	Río Barbilla	Río Matina	Atlantic	Costa Rica	CR	10.0442	-83.3338	P. mexicana	Clade 8m	8	P. mexicana	KP700294	This study	N/A	N/A
742	Poecilia sp.	Ingroup	168890	MLBM 168890	Río Barbilla at province rd just W of B-Line, a few km W of the rd to Matina (dirt rd, off NE side of big rd to Puerto Limon)	Río Barbilla	Río Matina	Atlantic	Costa Rica	CR	10.0442	-83.3338	P. mexicana	Clade 8m	8	P. mexicana	KP700295	This study	N/A	N/A
743	Poecilia sp.	Ingroup	168892	MLBM 168892	Río Barbilla at province rd just W of B-Line, a few km W of the rd to Matina (dirt rd, off NE side of big rd to Puerto Limon)	Río Barbilla	Río Matina	Atlantic	Costa Rica	CR	10.0442	-83.3338	P. mexicana	Clade 8m	8	P. mexicana	KP700297	This study	N/A	N/A
744	Poecilia sp.	Ingroup	168893	MLBM 168893	Río Barbilla at province rd just W of B-Line, a few km W of the rd to Matina (dirt rd, off NE side of big rd to Puerto Limon)	Río Barbilla	Río Matina	Atlantic	Costa Rica	CR	10.0442	-83.3338	P. mexicana	Clade 8m	8	P. mexicana	KP700298	This study	N/A	N/A
745	Poecilia sp.	Ingroup	168894	MLBM 168894	Río Barbilla at province rd just W of B-Line, a few km W of the rd to Matina (dirt rd, off NE side of big rd to Puerto Limon)	Río Barbilla	Río Matina	Atlantic	Costa Rica	CR	10.0442	-83.3338	P. mexicana	Clade 8m	8	P. mexicana	KP700299	This study	N/A	N/A
746	Poecilia sp.	Ingroup	168895	MLBM 168895	Río Barbilla at province rd just W of B-Line, a few km W of the rd to Matina (dirt rd, off NE side of big rd to Puerto Limon)	Río Barbilla	Río Matina	Atlantic	Costa Rica	CR	10.0442	-83.3338	P. mexicana	Clade 8m	8	P. mexicana	KP700300	This study	N/A	N/A
747	Poecilia gillii	Ingroup	PG805.01	MLBM 129610	Quebrada La Canela	Río Tarcoles	Río Grande de Tarcoles	Pacific	Costa Rica	CR	9.85151	-84.5277	P. mexicana	Clade 8m	8	P. mexicana	FJ446372	Lee & Johnson (2009)	N/A	N/A
748	Poecilia sp.	Ingroup	13972	STRI-NFC 13972	Río Sacramento	Río Sacramento	Río Coco	Atlantic	Nicaragua	N	13.2913	-86.1803	P. mexicana	Clade 8m	8	P. mexicana	KP700045	This study	N/A	N/A
749	Poecilia sp.	Ingroup	13973	STRI-NFC 13973	Río Sacramento	Río Sacramento	Río Coco	Atlantic	Nicaragua	N	13.2913	-86.1803	P. mexicana	Clade 8m	8	P. mexicana	KP700046	This study	N/A	N/A
750	Poecilia sp.	Ingroup	13974	STRI-NFC 13974	Río Sacramento	Río Sacramento	Río Coco	Atlantic	Nicaragua	N	13.2913	-86.1803	P. mexicana	Clade 8m	8	P. mexicana	KP700047	This study	N/A	N/A
751	Poecilia gillii	Ingroup	PG805.02	MLBM 129611	Quebrada La Canela	Río Tarcoles	Río Grande de Tarcoles	Pacific	Costa Rica	CR	9.85151	-84.5277	P. mexicana	Clade 8m	8	P. mexicana	FJ446373	Lee & Johnson (2009)	N/A	N/A
752	Poecilia gillii	Ingroup	PG807.01	MLBM 129623	Río Naranjo, trib. to Río Barranca, at CA 1, ~4.2 km NW of Barranca	Río Barranca	Río Barranca	Pacific	Costa Rica	CR	10.0226	-84.7344	P. mexicana	Clade 8m	8	P. mexicana	FJ446380	Lee & Johnson (2009)	N/A	N/A
753	Poecilia gillii	Ingroup	PG807.04	MLBM 129626	Río Naranjo, trib. to Río Barranca, at CA 1, ~4.2 km NW of Barranca	Río Barranca	Río Barranca	Pacific	Costa Rica	CR	10.0226	-84.7344	P. mexicana	Clade 8m	8	P. mexicana	FJ446383	Lee & Johnson (2009)	N/A	N/A
754	Poecilia gillii	Ingroup	PG807.05	MLBM 129627	Río Naranjo, trib. to Río Barranca, at CA 1, ~4.2 km NW of Barranca	Río Barranca	Río Barranca	Pacific	Costa Rica	CR	10.0226	-84.7344	P. mexicana	Clade 8m	8	P. mexicana	FJ446384	Lee & Johnson (2009)	N/A	N/A
755	Poecilia gillii	Ingroup	PG725.05	MLBM 235473	Río Sapoa just north of CR Hwy 4, approximately 2 km southeast of La Cruz	Lago Nicaragua	Río San Juan	Atlantic	Costa Rica	CR	11.0444	-85.6159	P. mexicana	Clade 8m	8	P. mexicana	FJ446352	Lee & Johnson (2009)	KP700513	This study
756	Poecilia sp.	Ingroup	13313	STRI-NFC 13313	Río de las Calabazas	Río de las Calabazas	Río Grande de Matagalpa	Atlantic	Nicaragua	N	12.6707	-86.0914	P. mexicana	Clade 8m	8	P. mexicana	KP700018	This study	N/A	N/A
757	Poecilia sp.	Ingroup	13314	STRI-NFC 13314	Río de las Calabazas	Río de las Calabazas	Río Grande de Matagalpa	Atlantic	Nicaragua	N	12.6707	-86.0914	P. mexicana	Clade 8m	8	P. mexicana	KP700019	This study	N/A	N/A
758	Poecilia sp.	Ingroup	13315	STRI-NFC 13315	Río de las Calabazas	Río de las Calabazas	Río Grande de Matagalpa	Atlantic	Nicaragua	N	12.6707	-86.0914	P. mexicana	Clade 8m	8	P. mexicana	KP700020	This study	N/A	N/A
759	Poecilia sp.	Ingroup	167938	MLBM 167938	Trib. to Río Grande de Matagalpa at Puente de Tierra Azul on rd to Río Blanco	Río Grande de Matagalpa	Río Grande de Matagalpa	Atlantic	Nicaragua	N	12.6848	-85.5471	P. mexicana	Clade 8m	8	P. mexicana	KP700202	This study	N/A	N/A
760	Poecilia sp.	Ingroup	168159	MLBM 168159	Trib. to unnamed trib. of the Río Grande de Matagalpa, ~32 km W of Río Blanco (town) on rd between Matagalpa and Río Blanco (town)	Río Grande de Matagalpa	Río Grande de Matagalpa	Atlantic	Nicaragua	N	12.8234	-85.4428	P. mexicana	Clade 8m	8	P. mexicana	KP700230	This study	N/A	N/A
761	Poecilia sp.	Ingroup	168161	MLBM 168161	Trib. to unnamed trib. of the Río Grande de Matagalpa, ~32 km W of Río Blanco (town) on rd between Matagalpa and Río Blanco (town)	Río Grande de Matagalpa	Río Grande de Matagalpa	Atlantic	Nicaragua	N	12.8234	-85.4428	P. mexicana	Clade 8m	8	P. mexicana	KP700232	This study	N/A	N/A
762	Poecilia sp.	Ingroup	168162	MLBM 168162	Trib. to unnamed trib. of the Río Grande de Matagalpa, ~32 km W of Río Blanco (town) on rd between Matagalpa and Río Blanco (town)	Río Grande de Matagalpa	Río Grande de Matagalpa	Atlantic	Nicaragua	N	12.8234	-85.4428	P. mexicana	Clade 8m	8	P. mexicana	KP700233	This study	N/A	N/A
763	Poecilia sphenops	Ingroup	13327	STRI-NFC 13327	Río Grande de Matagalpa just off CA 1, ~0.5 km SW of Sebaco	Río Grande de Matagalpa	Río Grande de Matagalpa	Atlantic	Nicaragua	N	12.8452	-86.1027	P. mexicana	Clade 8m	8	P. mexicana	KP700021	This study	N/A	N/A
764	Poecilia sp.	Ingroup	14294	STRI-NFC 14294	Unnamed trib. (Río Blanco?) ~5 km SW of Río Blanco (town at Nica Hwy 21B)	Río Grande de Matagalpa	Río Grande de Matagalpa	Atlantic	Nicaragua	N	12.8789	-85.2129	P. mexicana	Clade 8m	8	P. mexicana	KP700077	This study	N/A	N/A
765	Poecilia gillii	Ingroup	174327	MLBM 174327	Trib. to Río Grande Viejo (Río Viejoio) at Nica Hwy 26 ~4.5 km NW of El Jocote (between Estelí and León)	Lago Managua	Río San Juan	Atlantic	Nicaragua	N	12.8932	-86.1791	P. mexicana	Clade 8m	8	P. mexicana	KP700394	This study	KP700494	This study
766	Poecilia gillii	Ingroup	13417	STRI-NFC 13417	Río Viejo (afluente Lago de Managua)	Lago Managua	Río San Juan	Atlantic	Nicaragua	N	12.907	-86.1283	P. mexicana	Clade 8m	8	P. mexicana	KP700022	This study	N/A	N/A
767	Poecilia gillii	Ingroup	13418	STRI-NFC 13418	Río Viejo (afluente Lago de Managua)	Lago Managua	Río San Juan	Atlantic	Nicaragua	N	12.907	-86.1283	P. mexicana	Clade 8m	8	P. mexicana	KP700023	This study	N/A	N/A
768	Poecilia gillii	Ingroup	13419	STRI-NFC 13419	Río Viejo (afluente Lago de Managua)	Lago Managua	Río San Juan	Atlantic	Nicaragua	N	12.907	-86.1283	P. mexicana	Clade 8m	8	P. mexicana	KP700024	This study	N/A	N/A
769	Poecilia gillii	Ingroup	13420	STRI-NFC 13420	Río Viejo (afluente Lago de Managua)	Lago Managua	Río San Juan	Atlantic	Nicaragua	N	12.907	-86.1283	P. mexicana	Clade 8m	8	P. mexicana	KP700025	This study	N/A	N/A
770	Poecilia gillii	Ingroup	167956	MLBM 167956	Unnamed trib. to Río Estelí, thus a trib. to Río Coco	Río Estelí	Río Coco	Atlantic	Nicaragua	N	13.0587	-86.3511	P. mexicana	clade 8m	8	P. mexicana	KP700213	This study	N/A	N/A
771	P. mexicana	Ingroup	168807	MLBM 168807	Unnamed trib. to Lago de Apanás	Lago de Apanás	Río Grande de Matagalpa	Atlantic	Nicaragua	N	13.1184	-86.0102	P. mexicana	Clade 8m	8	P. mexicana	KP700277	This study	N/A	N/A
772	P. mexicana	Ingroup	168808	MLBM 168808	Unnamed trib. to Lago de Apanás	Lago de Apanás	Río Grande de Matagalpa	Atlantic	Nicaragua	N	13.1184	-86.0102	P. mexicana	Clade 8m	8	P. mexicana	KP700278	This study	N/A	N/A
773	P. mexicana	Ingroup	168809	MLBM 168809	Unnamed trib. to Lago de Apanás	Lago de Apanás	Río Grande de Matagalpa	Atlantic	Nicaragua	N	13.1184	-86.0102	P. mexicana	clade 8m	8	P. mexicana	KP700279	This study	N/A	N/A
774	P. mexicana	Ingroup	168810	MLBM 168810	Unnamed trib. to Lago de Apanás	Lago de Apanás	Río Grande de Matagalpa	Atlantic	Nicaragua	N	13.1184	-86.0102	P. mexicana	Clade 8m	8	P. mexicana	KP700280	This study	N/A	N/A
775	P. mexicana	Ingroup	168811	MLBM 168811	Unnamed trib. to Lago de Apanás	Lago de Apanás	Río Grande de Matagalpa	Atlantic	Nicaragua	N	13.1184	-86.0102	P. mexicana	Clade 8m	8	P. mexicana	KP700281	This study	N/A	N/A
776	P. mexicana	Ingroup	168813	MLBM 168813	Unnamed trib. to Lago de Apanás	Lago de Apanás	Río Grande de Matagalpa	Atlantic	Nicaragua	N	13.1184	-86.0102	P. mexicana	Clade 8m	8	P. mexicana	KP700283	This study	N/A	N/A
777	P. mexicana	Ingroup	168814	MLBM 168814	Unnamed trib. to Lago de Apanás	Lago de Apanás	Río Grande de Matagalpa	Atlantic	Nicaragua	N	13.1184	-86.0102	P. mexicana	clade 8m	8	P. mexicana	KP700284	This study	N/A	N/A
778	Poecilia sp.	Ingroup	13838	STRI-NFC 13838	Río Jiguina (afluente Lago Apanas)	Lago de Apanás	Río Grande de Matagalpa	Atlantic	Nicaragua	N	13.1506	-85.9292	P. mexicana	clade 8m	8	P. mexicana	KP700033	This study	N/A	N/A
779	Poecilia sp.	Ingroup	13845	STRI-NFC 13845	Río Jiguina (afluente Lago Apanas)	Lago de Apanás	Río Grande de Matagalpa	Atlantic	Nicaragua	N	13.1506	-85.9292	P. mexicana	Clade 8m	8	P. mexicana	KP700034	This study	N/A	N/A
780	Poecilia sp.	Ingroup	13846	STRI-NFC 13846	Río Jiguina (afluente Lago Apanas)	Lago de Apanás	Río Grande de Matagalpa	Atlantic	Nicaragua	N	13.1506	-85.9292	P. mexicana	Clade 8m	8	P. mexicana	KP700035	This study	N/A	N/A
781	Poecilia sp.	Ingroup	13970	STRI-NFC 13970	Río San Gabriel	Río San Gabriel	Río Grande de Matagalpa	Atlantic	Nicaragua	N	13.1745	-86.2853	P. mexicana	Clade 8m	8	P. mexicana	KP700043	This study	N/A	N/A
782	Poecilia sp.	Ingroup	13971	STRI-NFC 13971	Río San Gabriel	Río San Gabriel	Río Grande de Matagalpa	Atlantic	Nicaragua	N	13.1745	-86.2853	P. mexicana	Clade 8m	8	P. mexicana	KP700044	This study	N/A	N/A
783	P. mexicana	Ingroup	168168	MLBM 168168	Unnamed trib. to Río Grande de Matagalpa, at stream just W of km marker 226	Unnamed trib.	Río Grande de Matagalpa	Atlantic	Nicaragua	N	13.2577	-85.4544	P. mexicana	Clade 8m	8	P. mexicana	KP700238	This study	N/A	N/A
784	P. mexicana	Ingroup	168169	MLBM 168169	Unnamed trib. to Río Grande de Matagalpa, at stream just W of km marker 226	Unnamed trib.	Río Grande de Matagalpa	Atlantic	Nicaragua	N	13.2577	-85.4544	P. mexicana	Clade 8m	8	P. mexicana	KP700239	This study	N/A	N/A
785	P. mexicana	Ingroup	168170	MLBM 168170	Unnamed trib. to Río Grande de Matagalpa, at stream just W of km marker 226	Unnamed trib.	Río Grande de Matagalpa	Atlantic	Nicaragua	N	13.2577	-85.4544	P. mexicana	Clade 8m	8	P. mexicana	KP700240	This study	N/A	N/A
786	P. mexicana	Ingroup	168171	MLBM 168171	Unnamed trib. to Río Grande de Matagalpa, at stream just W of km marker 226	Unnamed trib.	Río Grande de Matagalpa	Atlantic	Nicaragua	N	13.2577	-85.4544	P. mexicana	Clade 8m	8	P. mexicana	KP700241	This study	N/A	N/A
787	P. mexicana	Ingroup	168172	MLBM 168172	Unnamed trib. to Río Grande de Matagalpa, at stream just W of km marker 226	Unnamed trib.	Río Grande de Matagalpa	Atlantic	Nicaragua	N	13.2577	-85.4544	P. mexicana	Clade 8m	8	P. mexicana	KP700242	This study	N/A	N/A
788	P. mexicana	Ingroup	168173	MLBM 168173	Unnamed trib. to Río Grande de Matagalpa, at stream just W of km marker 226	Unnamed trib.	Río Grande de Matagalpa	Atlantic	Nicaragua	N	13.2577	-85.4544	P. mexicana	Clade 8m	8	P. mexicana	KP700243	This study	N/A	N/A
789	P. mexicana	Ingroup	168174	MLBM 168174	Unnamed trib. to Río Grande de Matagalpa, at stream just W of km marker 226	Unnamed trib.	Río Grande de Matagalpa	Atlantic	Nicaragua	N	13.2577	-85.4544	P. mexicana	Clade 8m	8	P. mexicana	KP700244	This study	N/A	N/A
790	Poecilia sp.	Ingroup	14195	STRI-NFC 14195	Río Yaoska (afluente Río Tuma)	Río Tuma	Río Grande de Matagalpa	Atlantic	Nicaragua	N	13.2623	-85.4392	P. mexicana	Clade 8m	8	P. mexicana	KP700072	This study	N/A	N/A
791	Poecilia sp.	Ingroup	14196	STRI-NFC 14196	Río Yaoska (afluente Río Tuma)	Río Tuma	Río Grande de Matagalpa	Atlantic	Nicaragua	N	13.2623	-85.4392	P. mexicana	Clade 8m	8	P. mexicana	KP700073	This study	N/A	N/A
792	P. mexicana	Ingroup	168822	MLBM 168822	Unnamed trib. to Río Grande de Matagalpa, E of Waslala (rd to Siuna I think)	Unnamed trib.	Río Grande de Matagalpa	Atlantic	Nicaragua	N	13.3526	-85.3511	P. mexicana	Clade 8m	8	P. mexicana	KP700292	This study	N/A	N/A
793	Poecilia sp.	Ingroup	14154	STRI-NFC 14154	Río Santa Rita	Río Santa Rita	Río Grande de Matagalpa	Atlantic	Nicaragua	N	13.46	-84.9144	P. mexicana	Clade 8m	8	P. mexicana	KP700069	This study	N/A	N/A
794	Poecilia sp.	Ingroup	14155	STRI-NFC 14155	Río Santa Rita	Río Santa Rita	Río Grande de Matagalpa	Atlantic	Nicaragua	N	13.46	-84.9144	P. mexicana	Clade 8m	8	P. mexicana	KP700070	This study	N/A	N/A
795	Poecilia sp.	Ingroup	14256	STRI-NFC 14256	Río El Guineo (Afluente del Labú)	Río El Guineo	Río Prinzapolka	Atlantic	Nicaragua	N	13.5031	-84.8447	P. mexicana	Clade 8m	8	P. mexicana	KP700076	This study	N/A	N/A
796	Poecilia sp.	Ingroup	14145	STRI-NFC 14145	Río Chico Smith	Río Chico Smith	Río Prinzapolka	Atlantic	Nicaragua	N	13.555	-84.8633	P. mexicana	Clade 8m	8	P. mexicana	KP700067	This study	N/A	N/A
797	Poecilia sp.	Ingroup	14146	STRI-NFC 14146	Río Chico Smith	Río Chico Smith	Río Prinzapolka	Atlantic	Nicaragua	N	13.555	-84.8633	P. mexicana	Clade 8m	8	P. mexicana	KP700068	This study	N/A	N/A
798	Poecilia sp.	Ingroup	14231	STRI-NFC 14231	Río Yaoya	Río Yaoya	Río Prinzapolka	Atlantic	Nicaragua	N	13.6958	-84.6979	P. mexicana	Clade 8m	8	P. mexicana	KP700074	This study	N/A	N/A
799	Poecilia sp.	Ingroup	14232	STRI-NFC 14232	Río Yaoya	Río Yaoya	Río Prinzapolka	Atlantic	Nicaragua	N	13.6958	-84.6979	P. mexicana	Clade 8m	8	P. mexicana	KP700075	This study	N/A	N/A
800	Poecilia sp.	Ingroup	14131	STRI-NFC 14131	Río Pia	Río Pia	Río Prinzapolka	Atlantic	Nicaragua	N	13.7322	-84.5147	P. mexicana	Clade 8m	8	P. mexicana	KP700064	This study	N/A	N/A
801	Poecilia sp.	Ingroup	14132	STRI-NFC 14132	Río Pia	Río Pia	Río Prinzapolka	Atlantic	Nicaragua	N	13.7322	-84.5147	P. mexicana	Clade 8m	8	P. mexicana	KP700065	This study	N/A	N/A
802	Poecilia sp.	Ingroup	14100	STRI-NFC 14100	Río Danli	Río Danli	Río Prinzapolka	Atlantic	Nicaragua	N	13.8203	-85.0444	P. mexicana	Clade 8m	8	P. mexicana	KP700060	This study	N/A	N/A
803	Poecilia sp.	Ingroup	14110	STRI-NFC 14110	Río Sangsangwas	Río Sangsangwas	Río Prinzapolka	Atlantic	Nicaragua	N	13.9167	-84.5633	P. mexicana	Clade 8m	8	P. mexicana	KP700061	This study	N/A	N/A
804	Poecilia sp.	Ingroup	14111	STRI-NFC 14111	Río Sangsangwas	Río Sangsangwas	Río Prinzapolka	Atlantic	Nicaragua	N	13.9167	-84.5633	P. mexicana	Clade 8m	8	P. mexicana	KP700062	This study	N/A	N/A
805	Poecilia sp.	Ingroup	14112	STRI-NFC 14112	Río Sangsangwas	Río Sangsangwas	Río Prinzapolka	Atlantic	Nicaragua	N	13.9167	-84.5633	P. mexicana	Clade 8m	8	P. mexicana	KP700063	This study	N/A	N/A
806	Poecilia sp.	Ingroup	14137	STRI-NFC 14137	Río Ceperna	Río Ceperna	Río Prinzapolka	Atlantic	Nicaragua	N	13.9386	-84.8247	P. mexicana	Clade 8m	8	P. mexicana	KP700066	This study	N/A	N/A
807	Poecilia gillii	Ingroup	PG807.02	MLBM 129624	Río Naranjo, trib. to Río Barranca, at CA 1, ~4.2 km NW of Barranca	Río Barranca	Río Barranca	Pacific	Costa Rica	CR	10.0226	-84.7344	P. mexicana	Clade 8m	8	P. mexicana	FJ446381	Lee & Johnson (2009)	N/A	N/A
808	Poecilia gillii	Ingroup	PG807.03	MLBM 129625	Río Naranjo, trib. to Río Barranca, at CA 1, ~4.2 km NW of Barranca	Río Barranca	Río Barranca	Pacific	Costa Rica	CR	10.0226	-84.7344	P. mexicana	Clade 8m	8	P. mexicana	FJ446382	Lee & Johnson (2009)	N/A	N/A
809	Poecilia gillii	Ingroup	13308	STRI-NFC 13308	Río Ciruelas	Río Ciruelas	Río Barranca	Pacific	Costa Rica	CR	10.0591	-84.7592	P. mexicana	Clade 8m	8	P. mexicana	KP700017	This study	N/A	N/A
810	Poecilia sp.	Ingroup	167935	MLBM 167935	Trib. to Río Grande de Matagalpa at Puente de Tierra Azul on rd to Río Blanco	Río Grande de Matagalpa	Río Grande de Matagalpa	Atlantic	Nicaragua	N	12.6848	-85.5471	P. mexicana	Clade 8m	8	P. mexicana	KP700199	This study	N/A	N/A
811	Poecilia sp.	Ingroup	167936	MLBM 167936	Trib. to Río Grande de Matagalpa at Puente de Tierra Azul on rd to Río Blanco	Río Grande de Matagalpa	Río Grande de Matagalpa	Atlantic	Nicaragua	N	12.6848	-85.5471	P. mexicana	Clade 8m	8	P. mexicana	KP700200	This study	N/A	N/A
812	Poecilia sp.	Ingroup	167939	MLBM 167939	Trib. to Río Grande de Matagalpa at Puente de Tierra Azul on rd to Río Blanco	Río Grande de Matagalpa	Río Grande de Matagalpa	Atlantic	Nicaragua	N	12.6848	-85.5471	P. mexicana	Clade 8m	8	P. mexicana	KP700203	This study	N/A	N/A
813	Poecilia sp.	Ingroup	167941	MLBM 167941	Trib. to Río Grande de Matagalpa at Puente de Tierra Azul on rd to Río Blanco	Río Grande de Matagalpa	Río Grande de Matagalpa	Atlantic	Nicaragua	N	12.6848	-85.5471	P. mexicana	Clade 8m	8	P. mexicana	KP700205	This study	N/A	N/A
814	Poecilia sp.	Ingroup	167937	MLBM 167937	Trib. to Río Grande de Matagalpa at Puente de Tierra Azul on rd to Río Blanco	Río Grande de Matagalpa	Río Grande de Matagalpa	Atlantic	Nicaragua	N	12.6848	-85.5471	P. mexicana	Clade 8m	8	P. mexicana	KP700201	This study	N/A	N/A
815	Poecilia sp.	Ingroup	167940	MLBM 167940	Trib. to Río Grande de Matagalpa at Puente de Tierra Azul on rd to Río Blanco	Río Grande de Matagalpa	Río Grande de Matagalpa	Atlantic	Nicaragua	N	12.6848	-85.5471	P. mexicana	Clade 8m	8	P. mexicana	KP700204	This study	N/A	N/A
816	Poecilia sp.	Ingroup	167942	MLBM 167942	Trib. to Río Grande de Matagalpa at Puente de Tierra Azul on rd to Río Blanco	Río Grande de Matagalpa	Río Grande de Matagalpa	Atlantic	Nicaragua	N	12.6848	-85.5471	P. mexicana	Clade 8m	8	P. mexicana	KP700206	This study	N/A	N/A
817	Poecilia sp.	Ingroup	168160	MLBM 168160	Trib. to unnamed trib. of the Río Grande de Matagalpa, approx. 32 km W of Río Blanco (town) on rd between Matagalpa and Río Blanco (town)	Río Grande de Matagalpa	Río Grande de Matagalpa	Atlantic	Nicaragua	N	12.8234	-85.4428	P. mexicana	Clade 8m	8	P. mexicana	KP700231	This study	N/A	N/A
818	Poecilia sp.	Ingroup	168163	MLBM 168163	Trib. to unnamed trib. of the Río Grande de Matagalpa, approx. 32 km W of Río Blanco (town) on rd between Matagalpa and Río Blanco (town)	Río Grande de Matagalpa	Río Grande de Matagalpa	Atlantic	Nicaragua	N	12.8234	-85.4428	P. mexicana	Clade 8m	8	P. mexicana	KP700234	This study	N/A	N/A
819	Poecilia sp.	Ingroup	168164	MLBM 168164	Trib. to unnamed trib. of the Río Grande de Matagalpa, approx. 32 km W of Río Blanco (town) on rd between Matagalpa and Río Blanco (town)	Río Grande de Matagalpa	Río Grande de Matagalpa	Atlantic	Nicaragua	N	12.8234	-85.4428	P. mexicana	Clade 8m	8	P. mexicana	KP700235	This study	N/A	N/A
820	Poecilia sp.	Ingroup	168165	MLBM 168165	Trib. to unnamed trib. of the Río Grande de Matagalpa, approx. 32 km W of Río Blanco (town) on rd between Matagalpa and Río Blanco (town)	Río Grande de Matagalpa	Río Grande de Matagalpa	Atlantic	Nicaragua	N	12.8234	-85.4428	P. mexicana	Clade 8m	8	P. mexicana	KP700236	This study	N/A	N/A
821	Poecilia sp.	Ingroup	168166	MLBM 168166	Trib. to unnamed trib. of the Río Grande de Matagalpa, approx. 32 km W of Río Blanco (town) on rd between Matagalpa and Río Blanco (town)	Río Grande de Matagalpa	Río Grande de Matagalpa	Atlantic	Nicaragua	N	12.8234	-85.4428	P. mexicana	Clade 8m	8	P. mexicana	KP700237	This study	N/A	N/A
822	Poecilia sp.	Ingroup	168151	MLBM 168151	Unnamed trib. to Río Tuma NW of Río Blanco (town; flowing from Mt. Musun)	Río Tuma	Río Grande de Matagalpa	Atlantic	Nicaragua	N	12.9361	-85.2343	P. mexicana	Clade 8m	8	P. mexicana	KP700222	This study	N/A	N/A
823	Poecilia sp.	Ingroup	168152	MLBM 168152	Unnamed trib. to Río Tuma NW of Río Blanco (town; flowing from Mt. Musun)	Río Tuma	Río Grande de Matagalpa	Atlantic	Nicaragua	N	12.9361	-85.2343	P. mexicana	Clade 8m	8	P. mexicana	KP700223	This study	N/A	N/A
824	Poecilia sp.	Ingroup	168153	MLBM 168153	Unnamed trib. to Río Tuma NW of Río Blanco (town; flowing from Mt. Musun)	Río Tuma	Río Grande de Matagalpa	Atlantic	Nicaragua	N	12.9361	-85.2343	P. mexicana	Clade 8m	8	P. mexicana	KP700224	This study	N/A	N/A
825	Poecilia sp.	Ingroup	168154	MLBM 168154	Unnamed trib. to Río Tuma NW of Río Blanco (town; flowing from Mt. Musun)	Río Tuma	Río Grande de Matagalpa	Atlantic	Nicaragua	N	12.9361	-85.2343	P. mexicana	Clade 8m	8	P. mexicana	KP700225	This study	N/A	N/A
826	Poecilia sp.	Ingroup	168155	MLBM 168155	Unnamed trib. to Río Tuma NW of Río Blanco (town; flowing from Mt. Musun)	Río Tuma	Río Grande de Matagalpa	Atlantic	Nicaragua	N	12.9361	-85.2343	P. mexicana	Clade 8m	8	P. mexicana	KP700226	This study	N/A	N/A
827	Poecilia sp.	Ingroup	168156	MLBM 168156	Unnamed trib. to Río Tuma NW of Río Blanco (town; flowing from Mt. Musun)	Río Tuma	Río Grande de Matagalpa	Atlantic	Nicaragua	N	12.9361	-85.2343	P. mexicana	clade 8m	8	P. mexicana	KP700227	This study	N/A	N/A
828	Poecilia sp.	Ingroup	168157	MLBM 168157	Unnamed trib. to Río Tuma NW of Río Blanco (town; flowing from Mt. Musun)	Río Tuma	Río Grande de Matagalpa	Atlantic	Nicaragua	N	12.9361	-85.2343	P. mexicana	Clade 8m	8	P. mexicana	KP700228	This study	N/A	N/A
829	Poecilia sp.	Ingroup	168158	MLBM 168158	Unnamed trib. to Río Tuma NW of Río Blanco (town; flowing from Mt. Musun)	Río Tuma	Río Grande de Matagalpa	Atlantic	Nicaragua	N	12.9361	-85.2343	P. mexicana	Clade 8m	8	P. mexicana	KP700229	This study	N/A	N/A
830	P. mexicana	Ingroup	168812	MLBM 168812	Unnamed trib. to Lago de Apanás	Lago de Apanás	Río Grande de Matagalpa	Atlantic	Nicaragua	N	13.1184	-86.0102	P. mexicana	Clade 8m	8	P. mexicana	KP700282	This study	N/A	N/A
831	Poecilia sp.	Ingroup	13969	STRI-NFC 13969	Río San Gabriel	Río Grande de Matagalpa	Río Grande de Matagalpa	Atlantic	Nicaragua	N	13.1745	-86.2853	P. mexicana	Clade 8m	8	P. mexicana	KP700042	This study	N/A	N/A
832	Poecilia sp.	Ingroup	14172	STRI-NFC 14172	Río Babasca (afluente Río Tuma)	Río Grande de Matagalpa	Río Grande de Matagalpa	Atlantic	Nicaragua	N	13.2561	-85.5445	P. mexicana	Clade 8m	8	P. mexicana	KP700071	This study	N/A	N/A
833	P. mexicana	Ingroup	168815	MLBM 168815	Unnamed trib. to Río Grande de Matagalpa, E of Waslala (rd to Siuna I think)	Río Grande de Matagalpa	Río Grande de Matagalpa	Atlantic	Nicaragua	N	13.3526	-85.3511	P. mexicana	Clade 8m	8	P. mexicana	KP700285	This study	N/A	N/A
834	P. mexicana	Ingroup	168816	MLBM 168816	Unnamed trib. to Río Grande de Matagalpa, E of Waslala (rd to Siuna I think)	Río Grande de Matagalpa	Río Grande de Matagalpa	Atlantic	Nicaragua	N	13.3526	-85.3511	P. mexicana	Clade 8m	8	P. mexicana	KP700286	This study	N/A	N/A
835	P. mexicana	Ingroup	168817	MLBM 168817	Unnamed trib. to Río Grande de Matagalpa, E of Waslala (rd to Siuna I think)	Río Grande de Matagalpa	Río Grande de Matagalpa	Atlantic	Nicaragua	N	13.3526	-85.3511	P. mexicana	Clade 8m	8	P. mexicana	KP700287	This study	N/A	N/A
836	P. mexicana	Ingroup	168818	MLBM 168818	Unnamed trib. to Río Grande de Matagalpa, E of Waslala (rd to Siuna I think)	Río Grande de Matagalpa	Río Grande de Matagalpa	Atlantic	Nicaragua	N	13.3526	-85.3511	P. mexicana	Clade 8m	8	P. mexicana	KP700288	This study	N/A	N/A
837	P. mexicana	Ingroup	168819	MLBM 168819	Unnamed trib. to Río Grande de Matagalpa, E of Waslala (rd to Siuna I think)	Río Grande de Matagalpa	Río Grande de Matagalpa	Atlantic	Nicaragua	N	13.3526	-85.3511	P. mexicana	Clade 8m	8	P. mexicana	KP700289	This study	N/A	N/A
838	P. mexicana	Ingroup	168820	MLBM 168820	Unnamed trib. to Río Grande de Matagalpa, E of Waslala (rd to Siuna I think)	Río Grande de Matagalpa	Río Grande de Matagalpa	Atlantic	Nicaragua	N	13.3526	-85.3511	P. mexicana	Clade 8m	8	P. mexicana	KP700290	This study	N/A	N/A
839	P. mexicana	Ingroup	168821	MLBM 168821	Unnamed trib. to Río Grande de Matagalpa, E of Waslala (rd to Siuna I think)	Río Grande de Matagalpa	Río Grande de Matagalpa	Atlantic	Nicaragua	N	13.3526	-85.3511	P. mexicana	Clade 8m	8	P. mexicana	KP700291	This study	N/A	N/A
840	Poecilia sp.	Ingroup	14070	STRI-NFC 14070	Río Kum	Río Kum	Río Prinzapolka	Atlantic	Nicaragua	N	13.6358	-85.365	P. mexicana	Clade 8m	8	P. mexicana	KP700057	This study	N/A	N/A
841	Poecilia sp.	Ingroup	14072	STRI-NFC 14072	Río Kum	Río Kum	Río Prinzapolka	Atlantic	Nicaragua	N	13.6358	-85.365	P. mexicana	Clade 8m	8	P. mexicana	KP700059	This study	N/A	N/A
842	Poecilia sp.	Ingroup	14071	STRI-NFC 14071	Río Kum	Río Kum	Río Prinzapolka	Atlantic	Nicaragua	N	13.6358	-85.365	P. mexicana	Clade 8m	8	P. mexicana	KP700058	This study	N/A	N/A
843	Poecilia sp.	Ingroup	14060	STRI-NFC 14060	Río La Lana	Río La Lana	Río Coco	Atlantic	Nicaragua	N	13.6761	-85.7961	P. mexicana	Clade 8m	8	P. mexicana	KP700056	This study	N/A	N/A
844	Poecilia gillii	Ingroup	1245	STRI-NFC 1245	Río Sarapiqui	Río Sarapiqui	Río San Juan	Atlantic	Costa Rica	CR	10.4723	-83.992	P. mexicana	Clade 8m	8	P. mexicana	KP699800	This study	KP700420	This study
845	Poecilia gillii	Ingroup	PG713.03	MLBM 235194	Río Sarapiqui off Rd. 505 approximately 7.2 km northwest of Puerto Viejo de Sarapiqui	Río Sarapiqui	Río San Juan	Atlantic	Costa Rica	CR	10.5245	-84.0313	P. mexicana	Clade 8m	8	P. mexicana	FJ446273	Lee & Johnson (2009)	N/A	N/A
846	Poecilia gillii	Ingroup	PG713.09	MLBM 235418	Río Sarapiqui off Rd. 505 approximately 7.2 km northwest of Puerto Viejo de Sarapiqui	Río Sarapiqui	Río San Juan	Atlantic	Costa Rica	CR	10.5245	-84.0313	P. mexicana	Clade 8m	8	P. mexicana	FJ446279	Lee & Johnson (2009)	N/A	N/A
847	Poecilia gillii	Ingroup	PG713.12	MLBM 235421	Río Sarapiqui off Rd. 505 approximately 7.2 km northwest of Puerto Viejo de Sarapiqui	Río Sarapiqui	Río San Juan	Atlantic	Costa Rica	CR	10.5245	-84.0313	P. mexicana	Clade 8m	8	P. mexicana	FJ446282	Lee & Johnson (2009)	N/A	N/A
848	Poecilia gillii	Ingroup	2170	STRI-NFC 2170	Río Pizote	Lago Nicaragua	Río San Juan	Atlantic	Costa Rica	CR	10.9084	-85.2113	P. mexicana	clade 8m	8	P. mexicana	KP699817	This study	N/A	N/A
849	Poecilia gillii	Ingroup	PG726.01	MLBM 235204	Río Sabalo	Lago Nicaragua	Río San Juan	Atlantic	Costa Rica	CR	11.0428	-85.4892	P. mexicana	Clade 8m	8	P. mexicana	FJ446356	Lee & Johnson (2009)	N/A	N/A
850	Poecilia gillii	Ingroup	PG726.02	MLBM 235205	Río Sabalo	Lago Nicaragua	Río San Juan	Atlantic	Costa Rica	CR	11.0428	-85.4892	P. mexicana	clade 8m	8	P. mexicana	FJ446357	Lee & Johnson (2009)	N/A	N/A
851	Poecilia gillii	Ingroup	PG726.03	MLBM 235206	Río Sabalo	Lago Nicaragua	Río San Juan	Atlantic	Costa Rica	CR	11.0428	-85.4892	P. mexicana	Clade 8m	8	P. mexicana	FJ446358	Lee & Johnson (2009)	N/A	N/A
852	Poecilia gillii	Ingroup	PG726.04	MLBM 235207	Río Sabalo	Lago Nicaragua	Río San Juan	Atlantic	Costa Rica	CR	11.0428	-85.4892	P. mexicana	Clade 8m	8	P. mexicana	FJ446359	Lee & Johnson (2009)	N/A	N/A
853	Poecilia gillii	Ingroup	PG726.05	MLBM 235477	Río Sabalo	Lago Nicaragua	Río San Juan	Atlantic	Costa Rica	CR	11.0428	-85.4892	P. mexicana	Clade 8m	8	P. mexicana	FJ446360	Lee & Johnson (2009)	N/A	N/A
854	Poecilia gillii	Ingroup	PG726.06	MLBM 235478	Río Sabalo	Lago Nicaragua	Río San Juan	Atlantic	Costa Rica	CR	11.0428	-85.4892	P. mexicana	Clade 8m	8	P. mexicana	FJ446361	Lee & Johnson (2009)	N/A	N/A
855	Poecilia gillii	Ingroup	PG726.07	MLBM 235479	Río Sabalo	Lago Nicaragua	Río San Juan	Atlantic	Costa Rica	CR	11.0428	-85.4892	P. mexicana	Clade 8m	8	P. mexicana	FJ446362	Lee & Johnson (2009)	N/A	N/A
856	Poecilia gillii	Ingroup	PG726.08	MLBM 235480	Río Sabalo	Lago Nicaragua	Río San Juan	Atlantic	Costa Rica	CR	11.0428	-85.4892	P. mexicana	Clade 8m	8	P. mexicana	FJ446363	Lee & Johnson (2009)	N/A	N/A
857	Poecilia gillii	Ingroup	PG713.02	MLBM 235193	Río Sarapiqui off Rd. 505 approximately 7.2 km northwest of Puerto Viejo de Sarapiqui	Río Sarapiqui	Río San Juan	Atlantic	Costa Rica	CR	10.5245	-84.0313	P. mexicana	Clade 8m	8	P. mexicana	FJ446272	Lee & Johnson (2009)	N/A	N/A
858	Poecilia gillii	Ingroup	PG713.10	MLBM 235419	Río Sarapiqui off Rd. 505 approximately 7.2 km northwest of Puerto Viejo de Sarapiqui	Río Sarapiqui	Río San Juan	Atlantic	Costa Rica	CR	10.5245	-84.0313	P. mexicana	Clade 8m	8	P. mexicana	FJ446280	Lee & Johnson (2009)	KP700507	This study
859	Poecilia gillii	Ingroup	PG713.13	MLBM 235422	Río Sarapiqui off Rd. 505 approximately 7.2 km northwest of Puerto Viejo de Sarapiqui	Río Sarapiqui	Río San Juan	Atlantic	Costa Rica	CR	10.5245	-84.0313	P. mexicana	Clade 8m	8	P. mexicana	FJ446283	Lee & Johnson (2009)	N/A	N/A
860	Poecilia gillii	Ingroup	PG719.02	MLBM 235201	Río Queques, trib. to Río Frio, which drains to Lago Nicaragua	Río Frio	Río San Juan	Atlantic	Costa Rica	CR	10.6448	-84.8222	P. mexicana	Clade 8m	8	P. mexicana	FJ446301	Lee & Johnson (2009)	N/A	N/A
861	Poecilia gillii	Ingroup	PG713.05	MLBM 235414	Río Sarapiqui off Rd. 505 approximately 7.2 km northwest of Puerto Viejo de Sarapiqui	Río Sarapiqui	Río San Juan	Atlantic	Costa Rica	CR	10.5245	-84.0313	P. mexicana	Clade 8m	8	P. mexicana	FJ446275	Lee & Johnson (2009)	N/A	N/A
862	Poecilia gillii	Ingroup	PG713.06	MLBM 235415	Río Sarapiqui off Rd. 505 approximately 7.2 km northwest of Puerto Viejo de Sarapiqui	Río Sarapiqui	Río San Juan	Atlantic	Costa Rica	CR	10.5245	-84.0313	P. mexicana	Clade 8m	8	P. mexicana	FJ446276	Lee & Johnson (2009)	N/A	N/A
863	Poecilia gillii	Ingroup	PG713.08	MLBM 235417	Río Sarapiqui off Rd. 505 approximately 7.2 km northwest of Puerto Viejo de Sarapiqui	Río Sarapiqui	Río San Juan	Atlantic	Costa Rica	CR	10.5245	-84.0313	P. mexicana	Clade 8m	8	P. mexicana	FJ446278	Lee & Johnson (2009)	N/A	N/A
864	Poecilia gillii	Ingroup	PG719.01	MLBM 235200	Río Queques, trib. to Río Frio, which drains to Lago Nicaragua	Río Frio	Río San Juan	Atlantic	Costa Rica	CR	10.6448	-84.8222	P. mexicana	Clade 8m	8	P. mexicana	FJ446300	Lee & Johnson (2009)	N/A	N/A
865	Poecilia gillii	Ingroup	PG719.03	MLBM 235202	Río Queques, trib. to Río Frio, which drains to Lago Nicaragua	Río Frio	Río San Juan	Atlantic	Costa Rica	CR	10.6448	-84.8222	P. mexicana	clade 8m	8	P. mexicana	FJ446302	Lee & Johnson (2009)	N/A	N/A
866	Poecilia gillii	Ingroup	PG719.05	MLBM 235435	Río Queques, trib. to Río Frio, which drains to Lago Nicaragua	Río Frio	Río San Juan	Atlantic	Costa Rica	CR	10.6448	-84.8222	P. mexicana	clade 8m	8	P. mexicana	FJ446314	Lee & Johnson (2009)	N/A	N/A
867	Poecilia gillii	Ingroup	PG719.06	MLBM 235436	Río Queques, trib. to Río Frio, which drains to Lago Nicaragua	Río Frio	Río San Juan	Atlantic	Costa Rica	CR	10.6448	-84.8222	P. mexicana	clade 8m	8	P. mexicana	FJ446315	Lee & Johnson (2009)	N/A	N/A
868	Poecilia gillii	Ingroup	PG719.07	MLBM 235437	Río Queques, trib. to Río Frio, which drains to Lago Nicaragua	Río Frio	Río San Juan	Atlantic	Costa Rica	CR	10.6448	-84.8222	P. mexicana	clade 8m	8	P. mexicana	FJ446306	Lee & Johnson (2009)	N/A	N/A
869	Poecilia gillii	Ingroup	PG719.08	MLBM 235438	Río Queques, trib. to Río Frio, which drains to Lago Nicaragua	Río Frio	Río San Juan	Atlantic	Costa Rica	CR	10.6448	-84.8222	P. mexicana	clade 8m	8	P. mexicana	FJ446307	Lee & Johnson (2009)	N/A	N/A
870	Poecilia gillii	Ingroup	PG719.10	MLBM 235440	Río Queques, trib. to Río Frio, which drains to Lago Nicaragua	Río Frio	Río San Juan	Atlantic	Costa Rica	CR	10.6448	-84.8222	P. mexicana	clade 8m	8	P. mexicana	FJ446309	Lee & Johnson (2009)	N/A	N/A
871	Poecilia gillii	Ingroup	PG719.12	MLBM 235442	Río Queques, trib. to Río Frio, which drains to Lago Nicaragua	Río Frio	Río San Juan	Atlantic	Costa Rica	CR	10.6448	-84.8222	P. mexicana	clade 8m	8	P. mexicana	FJ446311	Lee & Johnson (2009)	N/A	N/A
872	Poecilia gillii	Ingroup	PG719.13	MLBM 235443	Río Queques, trib. to Río Frio, which drains to Lago Nicaragua	Río Frio	Río San Juan	Atlantic	Costa Rica	CR	10.6448	-84.8222	P. mexicana	clade 8m	8	P. mexicana	FJ446312	Lee & Johnson (2009)	N/A	N/A
873	Poecilia gillii	Ingroup	PG719.14	MLBM 235444	Río Queques, trib. to Río Frio, which drains to Lago Nicaragua	Río Frio	Río San Juan	Atlantic	Costa Rica	CR	10.6448	-84.8222	P. mexicana	clade 8m	8	P. mexicana	FJ446313	Lee & Johnson (2009)	N/A	N/A
874	Poecilia gillii	Ingroup	PG719.15	Lee & Johnson (2009)	Río Queques, trib. to Río Frio, which drains to Lago Nicaragua	Río Frio	Río San Juan	Atlantic	Costa Rica	CR	10.6448	-84.8222	P. mexicana	clade 8m	8	P. mexicana	N/A	Lee & Johnson (2009)	N/A	N/A
875	Poecilia gillii	Ingroup	PG719.16	Lee & Johnson (2009)	Río Queques, trib. to Río Frio, which drains to Lago Nicaragua	Río Frio	Río San Juan	Atlantic	Costa Rica	CR	10.6448	-84.8222	P. mexicana	clade 8m	8	P. mexicana	N/A	Lee & Johnson (2009)	N/A	N/A
876	Poecilia gillii	Ingroup	2171	STRI-NFC 2171	Río San Juan CR	Lago Nicaragua	Río San Juan	Atlantic	Costa Rica	CR	10.9084	-85.2113	P. mexicana	clade 8m	8	P. mexicana	KP699818	This study	KP700425	This study
877	Poecilia sp.	Ingroup	14722	STRI-NFC 14722	Río Cardenas, trib. to Lago Nicaragua	Lago Nicaragua	Río San Juan	Atlantic	Nicaragua	N	11.1903	-85.5178	P. mexicana	Clade 8m	8	P. mexicana	KP700078	This study	N/A	N/A
878	Poecilia sp.	Ingroup	167931	MLBM 167931	Unnamed trib. to Lake Nicaragua just E of mile marker km 238 on rd to San Miguelito, Chontales	Lago Nicaragua	Río San Juan	Atlantic	Nicaragua	N	11.5054	-84.8396	P. mexicana	Clade 8m	8	P. mexicana	KP700195	This study	N/A	N/A
879	Poecilia sp.	Ingroup	168709	MLBM 168709	Unnamed trib. to Lake Nicaragua just E of mile marker km 238 on rd to San Miguelito, Chontales	Lago Nicaragua	Río San Juan	Atlantic	Nicaragua	N	11.5054	-84.8396	P. mexicana	Clade 8m	8	P. mexicana	KP700261	This study	N/A	N/A
880	Poecilia gillii	Ingroup	172867	MLBM 172867	Río Malacatoya	Río Tipitapa/Laguna de Tisma	Río San Juan	Atlantic	Nicaragua	N	12.3266	-85.9555	P. mexicana	Clade 8m	8	P. mexicana	KP700336	This study	N/A	N/A
881	Poecilia gillii	Ingroup	172868	MLBM 172868	Río Malacatoya	Río Tipitapa/Laguna de Tisma	Río San Juan	Atlantic	Nicaragua	N	12.3266	-85.9555	P. mexicana	Clade 8m	8	P. mexicana	KP700337	This study	N/A	N/A
882	Poecilia sp.	Ingroup	168897	MLBM 168897	Unnamed trib. to Río Malacatoya at Teustepe, just off rd to Rama (Nica. 7), SW of Boaco	Lago Nicaragua	Río San Juan	Atlantic	Nicaragua	N	12.4183	-85.793	P. mexicana	Clade 8m	8	P. mexicana	KP700302	This study	N/A	N/A
883	Poecilia gillii	Ingroup	PG715.08	MLBM 235428	Río Infiernito off dirt road, 3 km east of CR Hwy 35, after traveling approximately 6.5 km north of Boca Arenal	Río Infernito	Río San Juan	Atlantic	Costa Rica	CR	10.618	-84.4842	P. mexicana	Clade 8m	8	P. mexicana	FJ446291	Lee & Johnson (2009)	N/A	N/A
884	Poecilia gillii	Ingroup	PG719.04	MLBM 235203	Río Queques, trib. to Río Frio, which drains to Lago Nicaragua	Río Frio	Río San Juan	Atlantic	Costa Rica	CR	10.6448	-84.8222	P. mexicana	Clade 8m	8	P. mexicana	FJ446303	Lee & Johnson (2009)	N/A	N/A
885	Poecilia gillii	Ingroup	PG719.09	MLBM 235439	Río Queques, trib. to Río Frio, which drains to Lago Nicaragua	Río Frio	Río San Juan	Atlantic	Costa Rica	CR	10.6448	-84.8222	P. mexicana	clade 8m	8	P. mexicana	FJ446308	Lee & Johnson (2009)	N/A	N/A
886	Poecilia gillii	Ingroup	PG719.11	MLBM 235441	Río Queques, trib. to Río Frio, which drains to Lago Nicaragua	Río Frio	Río San Juan	Atlantic	Costa Rica	CR	10.6448	-84.8222	P. mexicana	clade 8m	8	P. mexicana	FJ446310	Lee & Johnson (2009)	N/A	N/A
887	Poecilia gillii	Ingroup	PG716.01	MLBM 235198	Río Chimurria	Río San Carlos	Río San Juan	Atlantic	Costa Rica	CR	10.7274	-84.5582	P. mexicana	Clade 8m	8	P. mexicana	FJ446292	Lee & Johnson (2009)	N/A	N/A
888	Poecilia gillii	Ingroup	PG716.02	MLBM 235199	Río Chimurria	Río San Carlos	Río San Juan	Atlantic	Costa Rica	CR	10.7274	-84.5582	P. mexicana	Clade 8m	8	P. mexicana	FJ446293	Lee & Johnson (2009)	N/A	N/A
889	Poecilia gillii	Ingroup	PG716.03	MLBM 235429	Río Chimurria	Río San Carlos	Río San Juan	Atlantic	Costa Rica	CR	10.7274	-84.5582	P. mexicana	clade 8m	8	P. mexicana	FJ446294	Lee & Johnson (2009)	N/A	N/A
890	Poecilia gillii	Ingroup	PG716.05	MLBM 235431	Río Chimurria	Río San Carlos	Río San Juan	Atlantic	Costa Rica	CR	10.7274	-84.5582	P. mexicana	clade 8m	8	P. mexicana	FJ446296	Lee & Johnson (2009)	N/A	N/A
891	Poecilia gillii	Ingroup	PG716.06	MLBM 235432	Río Chimurria	Río San Carlos	Río San Juan	Atlantic	Costa Rica	CR	10.7274	-84.5582	P. mexicana	Clade 8m	8	P. mexicana	FJ446297	Lee & Johnson (2009)	N/A	N/A
892	Poecilia gillii	Ingroup	PG716.07	MLBM 235433	Río Chimurria	Río San Carlos	Río San Juan	Atlantic	Costa Rica	CR	10.7274	-84.5582	P. mexicana	clade 8m	8	P. mexicana	FJ446298	Lee & Johnson (2009)	N/A	N/A
893	Poecilia gillii	Ingroup	PG716.08	MLBM 235434	Río Chimurria	Río San Carlos	Río San Juan	Atlantic	Costa Rica	CR	10.7274	-84.5582	P. mexicana	clade 8m	8	P. mexicana	FJ446299	Lee & Johnson (2009)	N/A	N/A
894	Poecilia gillii	Ingroup	PG725.01	MLBM 235469	Río Sapoa just north of CR Hwy 4, approximately 2 km southeast of La Cruz	Lago Nicaragua	Río San Juan	Atlantic	Costa Rica	CR	11.0444	-85.6159	P. mexicana	Clade 8m	8	P. mexicana	FJ446348	Lee & Johnson (2009)	N/A	N/A
895	Poecilia gillii	Ingroup	PG725.04	MLBM 235472	Río Sapoa just north of CR Hwy 4, approximately 2 km southeast of La Cruz	Lago Nicaragua	Río San Juan	Atlantic	Costa Rica	CR	11.0444	-85.6159	P. mexicana	Clade 8m	8	P. mexicana	FJ446351	Lee & Johnson (2009)	KP700512	This study
896	Poecilia gillii	Ingroup	PG725.06	MLBM 235474	Río Sapoa just north of CR Hwy 4, approximately 2 km southeast of La Cruz	Lago Nicaragua	Río San Juan	Atlantic	Costa Rica	CR	11.0444	-85.6159	P. mexicana	Clade 8m	8	P. mexicana	FJ446353	Lee & Johnson (2009)	N/A	N/A
897	Poecilia sp.	Ingroup	167927	MLBM 167927	Unnamed trib. to Lake Nicaragua just E of mile marker km 238 on rd to San Miguelito, Chontales	Lago Nicaragua	Río San Juan	Atlantic	Nicaragua	N	11.5054	-84.8396	P. mexicana	Clade 8m	8	P. mexicana	KP700191	This study	N/A	N/A
898	Poecilia gillii	Ingroup	PG725.07	MLBM 235475	Río Sapoa just north of CR Hwy 4, approximately 2 km southeast of La Cruz	Lago Nicaragua	Río San Juan	Atlantic	Costa Rica	CR	11.0444	-85.6159	P. mexicana	Clade 8m	8	P. mexicana	FJ446354	Lee & Johnson (2009)	N/A	N/A
899	Poecilia sp.	Ingroup	167930	MLBM 167930	Unnamed trib. to Lake Nicaragua just E of mile marker km 238 on rd to San Miguelito, Chontales	Lago Nicaragua	Río San Juan	Atlantic	Nicaragua	N	11.5054	-84.8396	P. mexicana	Clade 8m	8	P. mexicana	KP700194	This study	N/A	N/A
900	Poecilia sp.	Ingroup	168710	MLBM 168710	Unnamed trib. to Lake Nicaragua just E of mile marker km 238 on rd to San Miguelito, Chontales	Lago Nicaragua	Río San Juan	Atlantic	Nicaragua	N	11.5054	-84.8396	P. mexicana	Clade 8m	8	P. mexicana	KP700262	This study	N/A	N/A
901	Poecilia sp.	Ingroup	167932	MLBM 167932	Unnamed trib. to Lake Nicaragua just E of mile marker km 238 on rd to San Miguelito, Chontales	Lago Nicaragua	Río San Juan	Atlantic	Nicaragua	N	11.5054	-84.8396	P. mexicana	Clade 8m	8	P. mexicana	KP700196	This study	N/A	N/A
902	Poecilia gillii	Ingroup	172540	MLBM 172540	Río Ochomogo	Lago Nicaragua	Río San Juan	Atlantic	Nicaragua	N	11.6566	-85.9732	P. mexicana	Clade 8m	8	P. mexicana	KP700322	This study	N/A	N/A
903	Poecilia gillii	Ingroup	173459	MLBM 173459	Unnamed trib. S of Nueva Guinea; Río Rama drainage	Río Rama	Río Escondido	Atlantic	Nicaragua	N	11.6784	-84.4562	P. mexicana	Clade 8m	8	P. mexicana	KP700361	This study	KP700486	This study
904	Poecilia gillii	Ingroup	173460	MLBM 173460	Unnamed trib. S of Nueva Guinea; Río Rama drainage	Río Rama	Río Escondido	Atlantic	Nicaragua	N	11.6784	-84.4562	P. mexicana	Clade 8m	8	P. mexicana	KP700362	This study	KP700487	This study
905	Poecilia gillii	Ingroup	173464	MLBM 173464	Unnamed trib. S of Nueva Guinea; Río Rama drainage	Río Rama	Río Escondido	Atlantic	Nicaragua	N	11.6784	-84.4562	P. mexicana	Clade 8m	8	P. mexicana	KP700363	This study	N/A	N/A
906	Poecilia gillii	Ingroup	173468	MLBM 173468	Unnamed trib. S of Nueva Guinea; Río Rama drainage	Río Rama	Río Escondido	Atlantic	Nicaragua	N	11.6784	-84.4562	P. mexicana	Clade 8m	8	P. mexicana	KP700365	This study	KP700488	This study
907	Poecilia gillii	Ingroup	173469	MLBM 173469	Unnamed trib. S of Nueva Guinea; Río Rama drainage	Río Rama	Río Escondido	Atlantic	Nicaragua	N	11.6784	-84.4562	P. mexicana	Clade 8m	8	P. mexicana	KP700366	This study	N/A	N/A
908	Poecilia gillii	Ingroup	173470	MLBM 173470	Unnamed trib. S of Nueva Guinea; Río Rama drainage	Río Rama	Río Escondido	Atlantic	Nicaragua	N	11.6784	-84.4562	P. mexicana	Clade 8m	8	P. mexicana	KP700367	This study	N/A	N/A
909	Poecilia sp.	Ingroup	167928	MLBM 167928	Unnamed trib./headwater of Río Mico NE of San Pedro de Lovago	Río Mico	Río Escondido	Atlantic	Nicaragua	N	12.1363	-85.046	P. mexicana	Clade 8m	8	P. mexicana	KP700192	This study	N/A	N/A
910	Poecilia sp.	Ingroup	167929	MLBM 167929	Unnamed trib./headwater of Río Mico NE of San Pedro de Lovago	Río Mico	Río Escondido	Atlantic	Nicaragua	N	12.1363	-85.046	P. mexicana	Clade 8m	8	P. mexicana	KP700193	This study	N/A	N/A
911	Poecilia gillii	Ingroup	173465	MLBM 173465	Unnamed trib. S of Nueva Guinea; Río Rama drainage	Río Rama	Río Escondido	Atlantic	Nicaragua	N	11.6784	-84.4562	P. mexicana	Clade 8m	8	P. mexicana	KP700364	This study	N/A	N/A
912	Poecilia gillii	Ingroup	172439	MLBM 172439	Río La Conquista	Río La Conquista	Río La Conquista	Pacific	Nicaragua	N	11.7247	-86.1847	P. mexicana	Clade 8m	8	P. mexicana	KP700308	This study	N/A	N/A
913	Poecilia gillii	Ingroup	173337	MLBM 173337	Río Mayales main stem	Lago Nicaragua	Río San Juan	Atlantic	Nicaragua	N	12.0668	-85.4038	P. mexicana	clade 8m	8	P. mexicana	KP700356	This study	KP700485	This study
914	Poecilia gillii	Ingroup	172440	MLBM 172440	Río La Conquista	Río La Conquista	Río Casares	Pacific	Nicaragua	N	11.7247	-86.1847	P. mexicana	Clade 8m	8	P. mexicana	KP700309	This study	N/A	N/A
915	Poecilia gillii	Ingroup	172441	MLBM 172441	Río La Conquista	Río La Conquista	Río Casares	Pacific	Nicaragua	N	11.7247	-86.1847	P. mexicana	Clade 8m	8	P. mexicana	KP700310	This study	KP700470	This study
916	Poecilia gillii	Ingroup	172442	MLBM 172442	Río La Conquista	Río La Conquista	Río Casares	Pacific	Nicaragua	N	11.7247	-86.1847	P. mexicana	Clade 8m	8	P. mexicana	KP700311	This study	KP700471	This study
917	Poecilia gillii	Ingroup	172445	MLBM 172445	Río La Conquista	Río La Conquista	Río Casares	Pacific	Nicaragua	N	11.7247	-86.1847	P. mexicana	Clade 8m	8	P. mexicana	KP700314	This study	N/A	N/A
918	Poecilia gillii	Ingroup	172443	MLBM 172443	Río La Conquista	Río La Conquista	Río Casares	Pacific	Nicaragua	N	11.7247	-86.1847	P. mexicana	Clade 8m	8	P. mexicana	KP700312	This study	N/A	N/A
919	Poecilia gillii	Ingroup	172444	MLBM 172444	Río La Conquista	Río La Conquista	Río Casares	Pacific	Nicaragua	N	11.7247	-86.1847	P. mexicana	Clade 8m	8	P. mexicana	KP700313	This study	N/A	N/A
920	Poecilia gillii	Ingroup	172446	MLBM 172446	Río La Conquista	Río La Conquista	Río Casares	Pacific	Nicaragua	N	11.7247	-86.1847	P. mexicana	Clade 8m	8	P. mexicana	KP700315	This study	N/A	N/A
921	Poecilia gillii	Ingroup	173274	MLBM 173274	Río Mayales	Lago Nicaragua	Río San Juan	Atlantic	Nicaragua	N	12.0566	-85.4081	P. mexicana	Clade 8m	8	P. mexicana	KP700354	This study	N/A	N/A
922	Poecilia gillii	Ingroup	173339	MLBM 173339	Río Mayales main stem	Lago Nicaragua	Río San Juan	Atlantic	Nicaragua	N	12.0668	-85.4038	P. mexicana	Clade 8m	8	P. mexicana	KP700357	This study	N/A	N/A
923	Poecilia gillii	Ingroup	172869	MLBM 172869	Río Tipitapa/Laguna de Tisma	Río Malacatoya	Río San Juan	Atlantic	Nicaragua	N	12.3266	-85.9555	P. mexicana	Clade 8m	8	P. mexicana	KP700338	This study	N/A	N/A
924	Poecilia gillii	Ingroup	173007	MLBM 173007	Río Caracol at Nica Hwy 7, trib. to Río Malacatoya	Lago Nicaragua	Río San Juan	Atlantic	Nicaragua	N	12.3512	-85.8887	P. mexicana	Clade 8m	8	P. mexicana	KP700343	This study	N/A	N/A
925	Poecilia gillii	Ingroup	173008	MLBM 173008	Río Caracol at Nica Hwy 7, trib. to Río Malacatoya	Lago Nicaragua	Río San Juan	Atlantic	Nicaragua	N	12.3512	-85.8887	P. mexicana	Clade 8m	8	P. mexicana	KP700344	This study	N/A	N/A
926	Poecilia sp.	Ingroup	168898	MLBM 168898	Unnamed trib. to Río Malacatoya at Teustepe, just off rd to Rama (Nica. 7), SW of Boaco	Lago Nicaragua	Río San Juan	Atlantic	Nicaragua	N	12.4183	-85.793	P. mexicana	Clade 8m	8	P. mexicana	KP700303	This study	N/A	N/A
927	Poecilia gillii	Ingroup	174114	MLBM 174114	Unnamed trib. to Río Ojucuapa, ~2 km SW of Nica Hwy 25, ~11 km SE of Acoyapa, on N side of Lago Nicaragua	Lago Nicaragua	Río San Juan	Atlantic	Nicaragua	N	11.8799	-85.1316	P. mexicana	Clade 8m	8	P. mexicana	KP700385	This study	N/A	N/A
928	Poecilia gillii	Ingroup	173336	MLBM 173336	Río Mayales main stem	Lago Nicaragua	Río San Juan	Atlantic	Nicaragua	N	12.0668	-85.4038	P. mexicana	clade 8m	8	P. mexicana	KP700355	This study	N/A	N/A
929	Poecilia gillii	Ingroup	173273	MLBM 173273	Trib. to Río Mayales about 6 km SW of Juigalpa on Nica Hwy 37	Lago Nicaragua	Río San Juan	Atlantic	Nicaragua	N	12.0566	-85.4081	P. mexicana	clade 8m	8	P. mexicana	KP700353	This study	N/A	N/A
930	Poecilia gillii	Ingroup	173341	MLBM 173341	Río Mayales main stem	Lago Nicaragua	Río San Juan	Atlantic	Nicaragua	N	12.0668	-85.4038	P. mexicana	Clade 8m	8	P. mexicana	KP700359	This study	N/A	N/A
931	Poecilia gillii	Ingroup	173005	MLBM 173005	Río Caracol at Nica Hwy 7, trib. to Río Malacatoya	Lago Nicaragua	Río San Juan	Atlantic	Nicaragua	N	12.3512	-85.8887	P. mexicana	Clade 8m	8	P. mexicana	KP700341	This study	N/A	N/A
932	Poecilia gillii	Ingroup	173006	MLBM 173006	Río Caracol at Nica Hwy 7, trib. to Río Malacatoya	Lago Nicaragua	Río San Juan	Atlantic	Nicaragua	N	12.3512	-85.8887	P. mexicana	Clade 8m	8	P. mexicana	KP700342	This study	N/A	N/A
933	Poecilia sp.	Ingroup	168896	MLBM 168896	Unnamed trib. to Río Malacatoya at Teustepe, just off rd to Rama (Nica. 7), SW of Boaco	Lago Nicaragua	Río San Juan	Atlantic	Nicaragua	N	12.4183	-85.793	P. mexicana	Clade 8m	8	P. mexicana	KP700301	This study	N/A	N/A
934	Poecilia gillii	Ingroup	PG708.01	MLBM 235182	Río Toro, trib. to Río Matina, just off Costa Rica Hwy 32 approximately 24 km west of Limon	Río Pascual	Río Matina	Atlantic	Costa Rica	CR	10.0168	-83.2102	P. mexicana	Clade 8m	8	P. mexicana	FJ446241	Lee & Johnson (2009)	N/A	N/A
935	Poecilia gillii	Ingroup	PG708.02	MLBM 235183	Río Toro, trib. to Río Matina, just off Costa Rica Hwy 32 approximately 24 km west of Limon	Río Pascual	Río Matina	Atlantic	Costa Rica	CR	10.0168	-83.2102	P. mexicana	Clade 8m	8	P. mexicana	FJ446242	Lee & Johnson (2009)	N/A	N/A
936	Poecilia gillii	Ingroup	PG708.04	MLBM 235391	Río Toro, trib. to Río Matina, just off Costa Rica Hwy 32 approximately 24 km west of Limon	Río Pascual	Río Matina	Atlantic	Costa Rica	CR	10.0168	-83.2102	P. mexicana	Clade 8m	8	P. mexicana	FJ446244	Lee & Johnson (2009)	N/A	N/A
937	Poecilia gillii	Ingroup	PG708.05	MLBM 235392	Río Toro, trib. to Río Matina, just off Costa Rica Hwy 32 approximately 24 km west of Limon	Río Pascual	Río Matina	Atlantic	Costa Rica	CR	10.0168	-83.2102	P. mexicana	Clade 8m	8	P. mexicana	FJ446245	Lee & Johnson (2009)	N/A	N/A
938	Poecilia gillii	Ingroup	172558	MLBM 172558	Unnamed drainage ditch trib. 1 km N of Ochomogo	Lago Nicaragua	Río San Juan	Atlantic	Nicaragua	N	11.6789	-85.9882	P. mexicana	Clade 8m	8	P. mexicana	KP700327	This study	N/A	N/A
939	Poecilia butleri	Ingroup	Pbut	Zuñiga-Vega et al. (2014)	N/A	N/A	N/A	Atlantic	Mexico	Mex	Zuñiga-Vega et al. (2014)	Zuñiga-Vega et al. (2014)	P. butleri	Clade 6	6	P. butleri	JN368093	Zuñiga-Vega et al. (2014)	N/A	N/A
940	Poecilia salvatoris	Ingroup	Psalv	N/A	N/A	N/A	N/A	Pacific	Honduras	Hon	N/A	N/A	P. salvatoris	Clade 8c	8	P. mexicana	N/A	This study; Michael Tobler	N/A	N/A
941	Poecilia salvatoris	Ingroup	Psalv	N/A	N/A	N/A	N/A	Pacific	Honduras	Hon	N/A	N/A	P. salvatoris	Clade 8c	8	P. mexicana	N/A	This study; Michael Tobler	KP700522	This study
942	Poecilia catemaconis	Ingroup	Pcatemac	N/A	Lago Catemaco	Río Grande de Catemaco	Río Grande de Catemaco	Atlantic	Mexico	Mex	N/A	N/A	P. catemaconis	Clade 2 - 2a Catemaco	2a	P. catemaconis (catemaconis + "sphenops" sp. 1)	KP700405	This study; Michael Tobler???	N/A	N/A
N/A	Poecilia caucana	Outgroup1	Pcauc	N/A	N/A	N/A	N/A	Atlantic	Trinidad	Trin	N/A	N/A	P. caucana	Pcauc	–	–	KP700406	This study; Michael Tobler	N/A	N/A
N/A	Poecilia latipinna	Outgroup2	Plati_0	Palacios et al. (2013)	N/A	N/A	N/A	Atlantic	N/A	N/A	N/A	N/A	P. latipinna	latipinna	–	–	KF276609	Palacios et al. (2013)	N/A	N/A
N/A	Poecilia latipinna	Outgroup3	Plat5	Tobler et al. (2011)	N/A	N/A	N/A	Atlantic	N/A	N/A	N/A	N/A	P. latipinna	latipinna	–	–	HQ677868	Tobler et al. (2011)	N/A	N/A
N/A	Poecilia latipinna	Outgroup4	Plat4	Tobler et al. (2011)	N/A	N/A	N/A	Atlantic	N/A	N/A	N/A	N/A	P. latipinna	latipinna	–	–	HQ677867	Tobler et al. (2011)	N/A	N/A
N/A	Poecilia latipinna	Outgroup5	Platip	Hrbek et al. (2007)	Ciudad Mante, Río Panuco Mexico	Río Panuco	Río Panuco	Atlantic	Mexico	Mex	N/A	N/A	P. latipinna	latipinna	–	–	EF017539	Hrbek et al. (2007)	KP700518	This study
N/A	Poecilia latipunctata	Outgroup6	Platipun	N/A	N/A	N/A	N/A	N/A	Mexico	Mex	N/A	N/A	P. latipunctata	latipunctata	–	–	KP700411	This study; Michael Tobler	KP700519	This study
N/A	Micropoecilia picta	Outgroup7	Ppict	N/A	N/A	N/A	N/A	Atlantic	Trinidad	Trin	N/A	N/A	M. picta	Mpicta	–	–	KP700412	This study; Michael Tobler	KP700520	This study
N/A	Poecilia reticulata	Outgroup8	Pret	N/A	N/A	N/A	N/A	Atlantic	Trinidad	Trin	N/A	N/A	P. reticulata	Pret	–	–	KP700413	This study; Michael Tobler	KP700521	This study
N/A	Poecilia latipinna	Outgroup9	PlatJBLee	MLBM 131127	N/A	N/A	N/A	Atlantic	Costa Rica	CR	N/A	N/A	P. latipinna	latipinna	–	–	FJ446153	Lee & Johnson (2009)	N/A	N/A
N/A	Poecilia reticulata	Outgroup10	4289	STRI-NFC 4289	Guanapo River	Caroni River	Caroni River	Atlantic	Trinidad	Trin	10.617430	-61.399360	P. reticulata	Pret	–	–	KP699837	This study	N/A	N/A
N/A	Poecilia reticulata	Outgroup11	4290	STRI-NFC 4290	Guanapo River	Caroni River	Caroni River	Atlantic	Trinidad	Trin	10.617430	-61.399360	P. reticulata	Pret	–	–	KP699838	This study	N/A	N/A
N/A	Poecilia latipinna	Outgroup12	8112	STRI-NFC 8112	N/A	N/A	N/A	N/A	Mexico	Mex	N/A	N/A	P. latipinna	latipinna	–	–	KP699889	This study	N/A	N/A
N/A	Xiphophorus helleri	Outgroup13	Xhell	Hrbek et al. (2007)	N/A	N/A	N/A	N/A	Mexico	Mex	N/A	N/A	X. helleri	Xhelleri	–	–	EF017548	Hrbek et al. (2007)	N/A	N/A
N/A	Xiphophorus maculatus	Outgroup14	Xmac	Hrbek et al. (2007)	N/A	N/A	N/A	N/A	Mexico	Mex	N/A	N/A	X. maculatus	Xmac	–	–	EF017551	Hrbek et al. (2007)	N/A	N/A
N/A	Belonesox belizanus	Outgroup15	Bbeliz	Hrbek et al. (2007)	N/A	N/A	N/A	N/A	N/A	N/A	N/A	N/A	B. belizanus	Bbeliz	–	–	EF017519	Hrbek et al. (2007)	N/A	N/A
N/A	Limia dominicensis	Outgroup16	Ldom	Hrbek et al. (2007)	N/A	N/A	N/A	Atlantic	Haiti/Dominican Republic	Ha/DR	N/A	N/A	L. dominicensis	Ldom	–	–	EF017533	Hrbek et al. (2007)	N/A	N/A
N/A	Limia melanogaster	Outgroup17	Lmela	Hrbek et al. (2007)	N/A	N/A	N/A	Atlantic	Haiti/Jamaica	Ha/Jam	N/A	N/A	L. melanogaster	Lmelan	–	–	EF017534	Hrbek et al. (2007)	N/A	N/A
N/A	Limia tridens	Outgroup18	Ltrid	Hrbek et al. (2007)	N/A	N/A	N/A	Atlantic	Haiti/Dominican Republic	Ha/DR	N/A	N/A	L. tridens	Ltrid	–	–	EF017535	Hrbek et al. (2007)	N/A	N/A
N/A	Limia vittata	Outgroup19	LvitCU153	Doadrio et al. (2009)	N/A	N/A	N/A	Atlantic	Cuba	Cub	N/A	N/A	L. vittata	Lvitt	–	–	FJ178765	Doadrio et al. (2009)	N/A	N/A
N/A	Limia vittata	Outgroup20	LvitC197	Doadrio et al. (2009)	N/A	N/A	N/A	Atlantic	Cuba	Cub	N/A	N/A	L. vittata	Lvitt	–	–	FJ178766	Doadrio et al. (2009)	N/A	N/A
N/A	Limia heterandria	Outgroup21	Lheteran	Meredith et al. (2011)	N/A	N/A	N/A	Atlantic	Venezuela	Ven	N/A	N/A	L. heterandria	Lheterand	–	–	HQ857426	Meredith et al. (2011)	N/A	N/A

## Sheet: concatenated mtDNA dataset
Concatenated mtDNA dataset																						Mitochondrial gene GenBank numbers
	Species_ID	Ingroup / Outgroup	ID	Voucher No. / Reference	Locality	Drainage 1	Drainage 2	Slope	Province / Department	Country	Country code	Latitude	Longitude	Collection ID	Date	Collected by	Mode of preservation	Taxon / lineage	CLADE	bGMYC groups	bGMYC-based taxonomy	Cytb	Reference	cox1	Reference
1	Poecilia orri	Ingroup	08.2060	LSU backlog/WAM08-109	Island of Roatan, Bay Islands, off northern coast of Honduras	Roatan	Atlantic Ocean	Atlantic	Islas de la Bahía	Honduras	Hon	N/A	N/A	WAM08-109	2008	Wilfredo A. Matamoros	fin clip in 95% ethanol	P. mexicana	Clade 8c	8	P. mexicana	N/A	N/A	KP700414	This study
2	Poecilia orri	Ingroup	08.2061	LSU backlog/WAM08-109	Island of Roatan, Bay Islands, off northern coast of Honduras	Roatan	Atlantic Ocean	Atlantic	Islas de la Bahía	Honduras	Hon	N/A	N/A	WAM08-109	2008	Wilfredo A. Matamoros	fin clip in 95% ethanol	P. mexicana	Clade 8c	8	P. mexicana	N/A	N/A	KP700415	This study
3	Poecilia orri	Ingroup	08.2066	LSU backlog/WAM08-109	Island of Roatan, Bay Islands, off northern coast of Honduras	Roatan	Atlantic Ocean	Atlantic	Islas de la Bahía	Honduras	Hon	N/A	N/A	WAM08-109	2008	Wilfredo A. Matamoros	fin clip in 95% ethanol	P. mexicana	Clade 8c	8	P. mexicana	N/A	N/A	KP700416	This study
4	Poecilia gillii	Ingroup	11162	STRI-NFC 11162	Quebrada El Nance, Santa Maria	Quebrada El Nance	Río Santa Maria	Pacific	Veraguas	Panama	Pan	8.41317	-81.0485	EB-99-11	1 April 1999	Eldredge Bermingham	N/A	P. mexicana	Clade 8h	8	P. mexicana	KP699995	This study	KP700447	This study
5	Poecilia gillii	Ingroup	11337	STRI-NFC 11337	Río Parti just south of CA 1, approximately 7 km E of Lago Bayano	Río Parti	Río Bayano	Pacific	Panamá	Panama	Pan	9.056	-78.6595	EB-99-15	8 April 1999	Eldredge Bermingham	N/A	P. gillii	Clade 5c	5b+c	Poecilia gillii (P. gillii, P. sp. "Patuca")	KP699997	This study	KP700448	This study
6	Poecilia gillii	Ingroup	118598	MLBM 118598	Río Salto at CR 6 between Upala and Bijagua	Río Salto	Río Tempisque	Pacific	Alajuela	Costa Rica	CR	10.7982	-85.0233	06-22	2006	Jerry Johnson Lab	whole fish in 95% ethanol	P. mexicana	Clade 8j	8	P. mexicana	N/A	N/A	KP700461	This study
7	Poecilia gillii	Ingroup	118599	MLBM 118598	Río Salto at CR 6 between Upala and Bijagua	Río Salto	Río Tempisque	Pacific	Alajuela	Costa Rica	CR	10.7982	-85.0233	06-22	2006	Jerry Johnson Lab	whole fish in 95% ethanol	P. mexicana	Clade 8j	8	P. mexicana	N/A	N/A	KP700462	This study
8	Poecilia gillii	Ingroup	1205	STRI-NFC 1205	Río Cañas (trib. to Río Tenorio) appxoimately 2 km southeast of town of Bebedero, ~10 km west of CA1	Río Bebedero	Río Tempisque	Pacific	Guanacaste	Costa Rica	CR	10.3483	-85.1688	EB-94-17	January 1994	Eldredge Bermingham	muscle plug in DMSO	P. mexicana	Clade 8m	8	P. mexicana	KP699796	This study	KP700418	This study
9	Poecilia gillii	Ingroup	1206	STRI-NFC 1206	Río Cañas (trib. to Río Tenorio) appxoimately 2 km southeast of town of Bebedero, ~10 km west of CA1	Río Bebedero	Río Tempisque	Pacific	Guanacaste	Costa Rica	CR	10.3483	-85.1688	EB-94-17	January 1994	Eldredge Bermingham	muscle plug in DMSO	P. mexicana	Clade 8a	8	P. mexicana	KP699797	This study	KP700419	This study
10	Poecilia gillii	Ingroup	12345	STRI-NFC 12345	Río San Pedro at San Pedro	Río San Pedro	Río Cocle del Norte	Atlantic	Coclé	Panama	Pan	8.72681	-80.2194	DF-00-16	17 March 2000	Daniel W. Fromm	muscle plug in DMSO	P. gillii	Clade 5c	5b+c	Poecilia gillii (P. gillii, P. sp. "Patuca")	KP700004	This study	KP700449	This study
11	Poecilia gillii	Ingroup	1245	STRI-NFC 1245	Río Sarapiquí, approximately 1 km northeast of Puerto Viejo de Sarapiquí	Río Sarapiquí	Río San Juan	Atlantic	Heredia	Costa Rica	CR	10.4723	-83.992	EB-94-21	20 January 1994	Eldredge Bermingham	muscle plug in DMSO	P. mexicana	Clade 8m	8	P. mexicana	KP699800	This study	KP700420	This study
12	Poecilia gillii	Ingroup	1246	STRI-NFC 1246	Río Sarapiquí, approximately 1 km northeast of Puerto Viejo de Sarapiquí	Río Sarapiquí	Río San Juan	Atlantic	Heredia	Costa Rica	CR	10.4723	-83.992	EB-94-21	20 January 1994	Eldredge Bermingham	muscle plug in DMSO	P. mexicana	Clade 8k	8	P. mexicana	KP699801	This study	KP700421	This study
13	Poecilia gillii	Ingroup	12481	STRI-NFC 12481	Quebrada at Punta Peña, located at Km 34 on "Almirante road" (Ruta Rambala-Almirante)	Río Uyama	Río Uyama	Atlantic	Bocas del Toro	Panama	Pan	9.11697	-82.2902	DF-00-34	24 March 2000	Daniel W. Fromm	muscle plug in DMSO	P. mexicana	Clade 8e	8	P. mexicana	KP700012	This study	KP700450	This study
14	Poecilia gillii	Ingroup	1291	STRI-NFC 1291	Río Sixaola, approximately 1.5 km south of CR 36 near Escuela de Olivia	Río Sixaola	Río Sixaola	Atlantic	Limón	Costa Rica	CR	9.59872	-82.8025	EB-94-24	21 January 1994	Eldredge Bermingham	muscle plug in DMSO	P. mexicana	Clade 8i	8	P. mexicana	KP699802	This study	KP700422	This study
15	Poecilia gillii	Ingroup	1292	STRI-NFC 1292	Río Sixaola, approximately 1.5 km south of CR 36 near Escuela de Olivia	Río Sixaola	Río Sixaola	Atlantic	Limón	Costa Rica	CR	9.59872	-82.8025	EB-94-24	21 January 1994	Eldredge Bermingham	muscle plug in DMSO	P. mexicana	Clade 8f	8	P. mexicana	KP699803	This study	KP700423	This study
16	Poecilia gillii	Ingroup	15446	STRI-NFC 15446	Río Guasimo, approximatley 20 km west of Lago Gatún	Río Guasimo	Río Miguel de la Borda	Atlantic	Colón	Panama	Pan	8.99125	-80.2744	EB-01-3	21 June 2001	Eldredge Bermingham	muscle plug in DMSO	P. mexicana	Clade 8h	8	P. mexicana	KP700091	This study	KP700451	This study
17	Poecilia gillii	Ingroup	15655	STRI-NFC 15655	Quebrada Tortuguita	Quebrada Tortuguita	Río Cocle del Norte	Atlantic	Coclé	Panama	Pan	8.88128	-80.3909	NK-01-15	26 July 2001	Neilan Kuntz	muscle plug in DMSO	P. mexicana	Clade 8d	8	P. mexicana	KP700093	This study	KP700452	This study
18	Poecilia gillii	Ingroup	16094	STRI-NFC 16094	Río Uracillo	Río Uracillo	Río Indio	Atlantic	Coclé	Panama	Pan	8.88086	-80.2198	NK-02-3	13 February 2002	Neilan Kuntz	muscle plug in DMSO	P. mexicana	Clade 8a	8	P. mexicana	KP700100	This study	KP700453	This study
19	Poecilia gillii	Ingroup	16123	STRI-NFC 16123	Quebrada Los Uveros, approximately 10 km southwest of western Lago Gatún limit, near Coclé-Panamá province border	Quebrada Los Uveros	Río Indio	Atlantic	Panamá	Panama	Pan	8.94719	-80.1382	NK-02-4	18 February 2002	Neilan Kuntz	muscle plug in DMSO	P. mexicana	Clade 8h	8	P. mexicana	KP700102	This study	KP700454	This study
20	Poecilia gillii	Ingroup	16439	STRI-NFC 16439	Río Piedras within the east-central portion of Parque Nacional Chagres, approximately 20 km northeast of Lago Alajuela	Río Piedras	Río Chagres	Atlantic	Panamá	Panama	Pan	9.37422	-79.3587	EB-02-5	13 March 2002	Eldredge Bermingham	muscle plug in DMSO	P. mexicana	Clade 5c	5b+c	Poecilia gillii (P. gillii, P. sp. "Patuca")	KP700119	This study	KP700455	This study
21	Poecilia gillii	Ingroup	16498	STRI-NFC 16498	Río Botija, approximately 12 km northeast of Parque Nacional Omar Torrijos	Río Botija	Río Cocle del Norte	Atlantic	Colón	Panama	Pan	8.812	-80.5797	NK-02-8	11 March 2002	Neilan Kuntz	muscle plug in DMSO	P. mexicana	Clade 8a	8	P. mexicana	KP700124	This study	KP700456	This study
22	Poecilia gillii	Ingroup	16784	STRI-NFC 16784	Quebrada en Mateo, near Pueblo Nuevo, approximately 2 km west of Bosque de Protección San Lorenzo	Río Lagarto	Río Lagarto	Atlantic	Colón	Panama	Pan	9.22581	-80.0859	CV-03-2	26 January 2003	Carlos Vergara	muscle plug in DMSO	P. mexicana	Clade 8h	8	P. mexicana	KP700140	This study	KP700457	This study
23	Poecilia gillii	Ingroup	167949	MLBM 167949	Trib. to Río Grande at La Trinidad	Lago Managua	Río San Juan	Atlantic	Estelí	Nicaragua	N	12.9713	-86.2372	N12-16	5 August 2012	Justin C. Bagley, Aaron Haskeltsie Smith	whole fish in 95% ethanol; smaller male with large gillii caudal fin spot and faded yellow spots(most likely; or could have been orange? Still recall yellow being most common in small males here?), yellow pelvic fins and belly; collected by JCB AHS (Aaron Haskeltskie Smith)	P. sphenops	Clade 2 - 2b	2b	P. sphenops	KP700208	This study	KP700463	This study
24	Poecilia gillii	Ingroup	167963	MLBM 167963	Unnamed trib. to Lago Managua between Estelí and León	Lago Managua	Río San Juan	Atlantic	Estelí	Nicaragua	N	13.228	-86.5527	N12-18	6 August 2012	Justin C. Bagley, Aaron Haskeltsie Smith	whole fish in 95% ethanol; med-large size female with black spots on sides form and gillii black caudal fin spot, yellow belly; collected by JCB AHS (Aaron Haskeltskie Smith)	P. sphenops	Clade 2 - 2b	2b	P. sphenops	KP700220	This study	KP700464	This study
25	Poecilia gillii	Ingroup	167964	MLBM 167964	Unnamed trib. to Lago Managua between Estelí and León	Lago Managua	Río San Juan	Atlantic	Estelí	Nicaragua	N	13.228	-86.5527	N12-18	6 August 2012	Justin C. Bagley, Aaron Haskeltsie Smith	whole fish in 95% ethanol; small-med size female with typical gillii dorsal fin with dark spot on lower anterior part and some small black spots, yellow belly, and some chaining on side, faded black caudal fin spot; collected by JCB AHS (Aaron Haskeltskie Smith)	P. mexicana	Clade 8b	8	P. mexicana	KP700221	This study	KP700465	This study
26	Poecilia gillii	Ingroup	167965	MLBM 167965	Unnamed trib. to Lago Managua between Estelí and León	Lago Managua	Río San Juan	Atlantic	Estelí	Nicaragua	N	13.228	-86.5527	N12-18	6 August 2012	Justin C. Bagley, Aaron Haskeltsie Smith	whole fish in 95% ethanol	P. sphenops	Clade 2 - 2b	2b	P. sphenops	N/A	N/A	KP700466	This study
27	Poecilia gillii	Ingroup	167966	MLBM 167966	Unnamed trib. to Lago Managua between Estelí and León	Lago Managua	Río San Juan	Atlantic	Estelí	Nicaragua	N	13.228	-86.5527	N12-18	6 August 2012	Justin C. Bagley, Aaron Haskeltsie Smith	whole fish in 95% ethanol	P. sphenops	Clade 2 - 2b	2b	P. sphenops	N/A	N/A	KP700467	This study
28	Poecilia gillii	Ingroup	167967	MLBM 167967	Unnamed trib. to Lago Managua between Estelí and León	Lago Managua	Río San Juan	Atlantic	Estelí	Nicaragua	N	13.228	-86.5527	N12-18	6 August 2012	Justin C. Bagley, Aaron Haskeltsie Smith	whole fish in 95% ethanol	P. mexicana	Clade 8b	8	P. mexicana	N/A	N/A	KP700468	This study
29	Poecilia gillii	Ingroup	168900	MLBM 168900	Unnamed trib. to Río Malacatoya at Teustepe, just off rd to Rama (Nica. 7), SW of Boaco, Boaco Province	Lago Nicaragua	Río San Juan	Atlantic	Boaco	Nicaragua	N	12.4183	-85.793	N12-15	5 August 2012	Justin C. Bagley, Aaron Haskeltsie Smith	whole fish in 95% ethanol; caudal fin spot like gilllii; collected by JCB AHS (Aaron Haskeltskie Smith)	P. sphenops	Clade 2 - 2b	2b	P. sphenops	KP700305	This study	KP700469	This study
30	Poecilia gillii	Ingroup	170215	MLBM 170215	El Diamante in Las Isletas, east of Volcan Mombacho	Lago Nicaragua	Río San Juan	Atlantic	Granada	Nicaragua	N	N/A	N/A	EVDB-13-2	4 February 2013	Eric P. van den Berghe	whole fish in 95% ethanol; males with red dorsal and caudal fins	P. sp. "Tipitapa"	Clade 1	1	P. sp. "Tipitapa"	N/A	Bagley et al. (in prep.)	N/A	N/A
31	Poecilia gillii	Ingroup	170217	MLBM 170217	El Diamante in Las Isletas, east of Volcan Mombacho	Lago Nicaragua	Río San Juan	Atlantic	Granada	Nicaragua	N	N/A	N/A	EVDB-13-2	4 February 2013	Eric P. van den Berghe	whole fish in 95% ethanol; males with red dorsal and caudal fins	P. sp. "Tipitapa"	Clade 1	1	P. sp. "Tipitapa"	N/A	Bagley et al. (in prep.)	N/A	N/A
32	Poecilia gillii	Ingroup	170219	MLBM 170219	El Diamante in Las Isletas, east of Volcan Mombacho	Lago Nicaragua	Río San Juan	Atlantic	Granada	Nicaragua	N	N/A	N/A	EVDB-13-2	4 February 2013	Eric P. van den Berghe	whole fish in 95% ethanol; males with red dorsal and caudal fins	P. sp. "Tipitapa"	Clade 1	1	P. sp. "Tipitapa"	N/A	Bagley et al. (in prep.)	N/A	N/A
33	Poecilia gillii	Ingroup	172441	MLBM 172441	Río La Conquista near La Conquista and El Caimito	Río La Conquista	Río Casares	Pacific	Carazo	Nicaragua	N	11.7247	-86.1847	N10-01	7 October 2010	Justin C. Bagley, Joseph T. Nelson, Jerald B. Johnson (Eric P. van den Berghe guiding/observing)	whole fish in 95% ethanol; plain fin (no red)	P. mexicana	Clade 8m	8	P. mexicana	KP700310	This study	KP700470	This study
34	Poecilia gillii	Ingroup	172442	MLBM 172442	Río La Conquista near La Conquista and El Caimito	Río La Conquista	Río Casares	Pacific	Carazo	Nicaragua	N	11.7247	-86.1847	N10-01	7 October 2010	Justin C. Bagley, Joseph T. Nelson, Jerald B. Johnson (Eric P. van den Berghe guiding/observing)	whole fish in 95% ethanol; red dorsal fin	P. mexicana	Clade 8m	8	P. mexicana	KP700311	This study	KP700471	This study
35	Poecilia gillii	Ingroup	172455	MLBM 172455	Lago Jiloa near Ken McKaye field station	Lago Jiloa	Lago Jiloa	N/A	Managua	Nicaragua	N	12.2186	-86.3119	N10-02	6 October 2010	Justin C. Bagley, Joseph T. Nelson	whole fish in 95% ethanol	P. mexicana	Clade 8b	8	P. mexicana	KP700316	This study	KP700472	This study
36	Poecilia gillii	Ingroup	172539	MLBM 172539	Río Ochomogo, 300 m west of CA 1 near Paso Real de Ochomogo	Lago Nicaragua	Río San Juan	Atlantic	Granada	Nicaragua	N	11.6566	-85.9732	N10-04	7 October 2010	Jerald B. Johnson, Joseph T. Nelson	whole fish in 95% ethanol	P. mexicana	Clade 8m	8	P. mexicana	KP700321	This study	KP700473	This study
37	Poecilia gillii	Ingroup	172541	MLBM 172541	Río Ochomogo, 300 m west of CA 1 near Paso Real de Ochomogo	Lago Nicaragua	Río San Juan	Atlantic	Granada	Nicaragua	N	11.6566	-85.9732	N10-04	7 October 2010	Jerald B. Johnson, Joseph T. Nelson	whole fish in 95% ethanol	P. mexicana	Clade 8m	8	P. mexicana	KP700323	This study	KP700474	This study
38	Poecilia gillii	Ingroup	172554	MLBM 172554	Unnamed drainage ditch trib. 1 km N of Ochomogo	Lago Nicaragua	Río San Juan	Atlantic	Granada	Nicaragua	N	11.6789	-85.9882	N10-05	7 October 2010	Justin C. Bagley, Joseph T. Nelson	whole fish in 95% ethanol	P. sphenops	Clade 2 - 2b	2b	P. sphenops	KP700326	This study	KP700475	This study
39	Poecilia gillii	Ingroup	172695	MLBM 172695	Río Tipitapa, river between Lago Managua and Lago Nicaragua	Lago Nicaragua	Río San Juan	Atlantic	Managua	Nicaragua	N	12.2027	-86.1021	N10-06	8 October 2010	Justin C. Bagley, Joseph T. Nelson	whole fish in 95% ethanol	P. sp. "Tipitapa"	Clade 1	1	P. sp. "Tipitapa"	KP700329	This study	KP700476	This study
40	Poecilia gillii	Ingroup	172702	MLBM 172702	Río Tipitapa, river between Lago Managua and Lago Nicaragua	Lago Nicaragua	Río San Juan	Atlantic	Managua	Nicaragua	N	12.2027	-86.1021	N10-06	8 October 2010	Justin C. Bagley, Joseph T. Nelson	whole fish in 95% ethanol	P. sp. "Tipitapa"	Clade 1	1	P. sp. "Tipitapa"	KP700335	This study	KP700477	This study
41	Poecilia gillii	Ingroup	173004	MLBM 173004	Río Caracol (trib. To Río Malacatoya) at Puente de Caracol	Lago Nicaragua	Río San Juan	Atlantic	Boaco	Nicaragua	N	12.3512	-85.8887	N10-08	8 October 2010	Jerald B. Johnson, Joseph T. Nelson	whole fish in 95% ethanol	P. sphenops	Clade 2 - 2b	2b	P. sphenops	KP700340	This study	KP700478	This study
42	Poecilia gillii	Ingroup	173020	MLBM 173020	Trib. to Río Malacatoya at Teustepe ~27 km SW of Boaco, Boaco dept/prov.	Lago Nicaragua	Río San Juan	Atlantic	Boaco	Nicaragua	N	12.4116	-85.7917	N10-09	8 October 2010	Justin C. Bagley, Joseph T. Nelson	whole fish in 95% ethanol; plain fin (no red)	P. sphenops	Clade 2 - 2b	2b	P. sphenops	KP700345	This study	KP700479	This study
43	Poecilia gillii	Ingroup	173021	MLBM 173021	Trib. to Río Malacatoya at Teustepe ~27 km SW of Boaco, Boaco dept/prov.	Lago Nicaragua	Río San Juan	Atlantic	Boaco	Nicaragua	N	12.4116	-85.7917	N10-09	8 October 2010	Justin C. Bagley, Joseph T. Nelson	whole fish in 95% ethanol; plain fin (no red)	P. sphenops	Clade 2 - 2b	2b	P. sphenops	KP700346	This study	KP700480	This study
44	Poecilia gillii	Ingroup	173022	MLBM 173022	Trib. to Río Malacatoya at Teustepe ~27 km SW of Boaco, Boaco dept/prov.	Lago Nicaragua	Río San Juan	Atlantic	Boaco	Nicaragua	N	12.4116	-85.7917	N10-09	8 October 2010	Justin C. Bagley, Joseph T. Nelson	whole fish in 95% ethanol; plain fin (no red)	P. sphenops	Clade 2 - 2b	2b	P. sphenops	KP700347	This study	KP700481	This study
45	Poecilia gillii	Ingroup	173048	MLBM 173048	Unnamed trib. to Río Murra at Nica Hwy 19 about halfway between Boaco and Camoapa	Río Murra	Río Grande de Matagalpa	Atlantic	Boaco	Nicaragua	N	12.4551	-85.5354	N10-11	8 October 2010	Justin C. Bagley, Joseph T. Nelson, Jerald B. Johnson	whole fish in 95% ethanol; based on male dorsal fins, this coll. contains "melanic form"	P. mexicana	Clade 8j	8	P. mexicana	N/A	N/A	KP700482	This study
46	Poecilia gillii	Ingroup	173271	MLBM 173271	Trib. to Río Mayales	Lago Nicaragua	Río San Juan	Atlantic	Chontales	Nicaragua	N	12.0566	-85.4081	N10-13	8 October 2010	Justin C. Bagley, Joseph T. Nelson	whole fish in 95% ethanol; red dorsal fin	P. mexicana	Clade 8m	8	P. mexicana	KP700351	This study	KP700483	This study
47	Poecilia gillii	Ingroup	173272	MLBM 173272	Trib. to Río Mayales	Lago Nicaragua	Río San Juan	Atlantic	Chontales	Nicaragua	N	12.0566	-85.4081	N10-13	8 October 2010	Justin C. Bagley, Joseph T. Nelson	whole fish in 95% ethanol; plain fin (no red)	P. mexicana	clade 8m	8	P. mexicana	KP700352	This study	KP700484	This study
48	Poecilia gillii	Ingroup	173337	MLBM 173337	Río Mayales main stem	Lago Nicaragua	Río San Juan	Atlantic	Chontales	Nicaragua	N	12.0668	-85.4038	N10-14	8 October 2010	Justin C. Bagley, Joseph T. Nelson	whole fish in 95% ethanol; plain fin (no red)	P. mexicana	clade 8m	8	P. mexicana	KP700356	This study	KP700485	This study
49	Poecilia gillii	Ingroup	173459	MLBM 173459	Trib. to Río Zapote S of Nueva Guinea, approximately 1 km S end of Hwy 71; a tributary to Río Plata	Río Rama	Río Escondido	Atlantic	Región Autónoma del Atlántico Sur	Nicaragua	N	11.6784	-84.4562	N10-17	9 October 2010	Justin C. Bagley, Joseph T. Nelson	whole fish in 95% ethanol	P. mexicana	Clade 8m	8	P. mexicana	KP700361	This study	KP700486	This study
50	Poecilia gillii	Ingroup	173460	MLBM 173460	Trib. to Río Zapote S of Nueva Guinea, approximately 1 km S end of Hwy 71; a tributary to Río Plata	Río Rama	Río Escondido	Atlantic	Región Autónoma del Atlántico Sur	Nicaragua	N	11.6784	-84.4562	N10-17	9 October 2010	Justin C. Bagley, Joseph T. Nelson	whole fish in 95% ethanol	P. mexicana	Clade 8m	8	P. mexicana	KP700362	This study	KP700487	This study
51	Poecilia gillii	Ingroup	173468	MLBM 173468	Trib. to Río Zapote S of Nueva Guinea, approximately 1 km S end of Hwy 71; a tributary to Río Plata	Río Rama	Río Escondido	Atlantic	Región Autónoma del Atlántico Sur	Nicaragua	N	11.6784	-84.4562	N10-17	9 October 2010	Justin C. Bagley, Joseph T. Nelson	whole fish in 95% ethanol	P. mexicana	Clade 8m	8	P. mexicana	KP700365	This study	KP700488	This study
52	Poecilia gillii	Ingroup	173681	MLBM 173681	Unnamed trib. to Lago Nicaragua	Lago Nicaragua	Río San Juan	Atlantic	Río San Juan	Nicaragua	N	11.7492	-84.5582	N10-19	9 October 2010	Justin C. Bagley, Joseph T. Nelson	whole fish in 95% ethanol	P. mexicana	Clade 8m	8	P. mexicana	KP700369	This study	KP700489	This study
53	Poecilia gillii	Ingroup	1737	STRI-NFC 1737	Río Acla	Río Acla	Río Acla	Atlantic	San Blas	Panama	Pan	8.84589	-77.6882	EB-94-50	15 May 1994	Eldredge Bermingham	muscle plug in DMSO (orig.); then 95% EtOH	"gillii" sp. 2	Clade 3 Acla	3	"gillii" sp. 2	KP699811	This study	KP700424	This study
54	Poecilia gillii	Ingroup	173960	MLBM 173960	Unnamed trib. to Río Ojucuapa, trib. to Lago Nicaragua, in cow pasture just off rd ~5.5 km northeast of El Guasimo (further from the main rd than N10-24)	Lago Nicaragua	Río San Juan	Atlantic	Chontales	Nicaragua	N	11.8294	-85.2048	N10-23	10 October 2010	Jerald B. Johnson, Joseph T. Nelson	whole fish in 95% ethanol	P. mexicana	Clade 8m	8	P. mexicana	KP700375	This study	KP700490	This study
55	Poecilia gillii	Ingroup	173961	MLBM 173961	Unnamed trib. to Río Ojucuapa, trib. to Lago Nicaragua, in cow pasture just off rd ~5.5 km northeast of El Guasimo (further from the main rd than N10-24)	Lago Nicaragua	Río San Juan	Atlantic	Chontales	Nicaragua	N	11.8294	-85.2048	N10-23	10 October 2010	Jerald B. Johnson, Joseph T. Nelson	whole fish in 95% ethanol	P. sp. "Tipitapa"	Clade 1	1	P. sp. "Tipitapa"	KP700376	This study	KP700491	This study
56	Poecilia gillii	Ingroup	173963	MLBM 173963	Unnamed trib. to Río Ojucuapa, trib. to Lago Nicaragua, in cow pasture just off rd ~5.5 km northeast of El Guasimo (further from the main rd than N10-24)	Lago Nicaragua	Río San Juan	Atlantic	Chontales	Nicaragua	N	11.8294	-85.2048	N10-23	10 October 2010	Jerald B. Johnson, Joseph T. Nelson	whole fish in 95% ethanol	P. sp. "Tipitapa"	Clade 1	1	P. sp. "Tipitapa"	KP700377	This study	KP700492	This study
57	Poecilia gillii	Ingroup	173964	MLBM 173964	Unnamed trib. to Río Ojucuapa, trib. to Lago Nicaragua, in cow pasture just off rd ~5.5 km northeast of El Guasimo (further from the main rd than N10-24)	Lago Nicaragua	Río San Juan	Atlantic	Chontales	Nicaragua	N	11.8294	-85.2048	N10-23	10 October 2010	Jerald B. Johnson, Joseph T. Nelson	whole fish in 95% ethanol	P. mexicana	Clade 8m	8	P. mexicana	KP700378	This study	KP700493	This study
58	Poecilia gillii	Ingroup	174327	MLBM 174327	Trib. to Río Grande Viejo on road between Estelí and León	Lago Managua	Río San Juan	Atlantic	Matagalpa	Nicaragua	N	12.8932	-86.1791	N10-30	11 October 2010	Justin C. Bagley, Joseph T. Nelson	whole fish in 95% ethanol; Río Grande Viejo	P. mexicana	Clade 8m	8	P. mexicana	KP700394	This study	KP700494	This study
59	Poecilia gillii	Ingroup	174328	MLBM 174328	Trib. to Río Grande Viejo on road between Estelí and León	Lago Managua	Río San Juan	Atlantic	Matagalpa	Nicaragua	N	12.8932	-86.1791	N10-30	11 October 2010	Justin C. Bagley, Joseph T. Nelson	whole fish in 95% ethanol; Río Grande Viejo	P. sphenops	Clade 2 - 2b	2b	P. sphenops	KP700395	This study	KP700495	This study
60	Poecilia gillii	Ingroup	174511	MLBM 174511	Unnamed trib. to Río Tamarindo, ~5 km NW of El Tamarindo (around 20 km SE of León)	Unnamed trib.	Río Tamarindo	Pacific	León	Nicaragua	N	12.2811	-86.7511	N10-34	11 October 2010	Justin C. Bagley, Joseph T. Nelson	whole fish in 95% ethanol	P. sphenops	Clade 2 - 2b	2b	P. sphenops	KP700399	This study	KP700496	This study
61	Poecilia gillii	Ingroup	18720	STRI-NFC 18720	Río Mensabé, Azuero Peninsula	Río Mensabé	Río Salado	Pacific	Los Santos	Panama	Pan	7.70497	-80.2781	RGR-05-6	2 February 2005	Ruth Gisela Reina	whole fish in 95% ethanol	P. mexicana	Clade 8i	8	P. mexicana	KP700162	This study	KP700458	This study
62	Poecilia gillii	Ingroup	2171	STRI-NFC 2171	Río Pizote	Lago Nicaragua	Río San Juan	Atlantic	Alajuela	Costa Rica	CR	10.9084	-85.2113	EB-94-15	15 January 1994	Eldredge Bermingham	muscle plug in DMSO	P. mexicana	clade 8m	8	P. mexicana	KP699818	This study	KP700425	This study
63	Poecilia gillii	Ingroup	23082	STRI-NFC 23082	Río San Bartolo	Río San Bartolo	Río San Bartolo	Pacific	Chiriqui	Panama	Pan	8.32094	-82.8668	JB-09-12	17 January 2009	John Boylan, Adrianus Schonewille, Ken Normandin	N/A	P. sp. "Patuca"	Clade 5b	5b+c	Poecilia gillii (P. gillii, P. sp. "Patuca")	KP700169	This study	KP700459	This study
64	Poecilia gillii	Ingroup	23165	STRI-NFC 23165	Río Bayano	Río Bayano	Río Bayano	Pacific	Panamá	Panama	Pan	9.25519	-79.1167	JB-09-38	27 January 2009	John Boylan, Adrianus Schonewille, Ken Normandin	N/A	P. gillii	Clade 5c	5b+c	Poecilia gillii (P. gillii, P. sp. "Patuca")	N/A	N/A	KP700460	This study
65	Poecilia gillii	Ingroup	3871	STRI-NFC 3871	Río Acla	Río Acla	Río Acla	Atlantic	San Blas	Panama	Pan	8.84306	-77.6836	EB-95-15	21 February 1995	Eldredge Bermingham	muscle plug in DMSO	"gillii" sp. 2	Clade 3 Acla	3	"gillii" sp. 2	KP699834	This study	KP700426	This study
66	Poecilia gillii	Ingroup	4161	STRI-NFC 4161	Río Acla	Río Acla-Quebrada 2	Río Acla	Atlantic	San Blas	Panama	Pan	8.79578	-77.6733	EB-95-18	22 February 1995	Eldredge Bermingham	muscle plug in DMSO	"gillii" sp. 2	Clade 3 Acla	3	"gillii" sp. 2	KP699835	This study	KP700427	This study
67	Poecilia gillii	Ingroup	4163	STRI-NFC 4163	Río Acla	Río Acla-Quebrada 2	Río Acla	Atlantic	San Blas	Panama	Pan	8.79578	-77.6733	EB-95-18	22 February 1995	Eldredge Bermingham	muscle plug in DMSO (orig.); then 95% EtOH	"gillii" sp. 2	Clade 3 Acla	3	"gillii" sp. 2	KP699836	This study	KP700428	This study
68	Poecilia gillii	Ingroup	6803	STRI-NFC 6803	Old Gamboa Rd. Creek, Río Chagres	Old Gamboa Rd. Creek	Río Chagres	Atlantic	Panamá	Panama	Pan	9.11	-79.68	EB-97-1	3 July 1997	Eldredge Bermingham	muscle plug in DMSO (orig.); then 95% EtOH	P. mexicana	Clade 8h	8	P. mexicana	KP699854	This study	KP700429	This study
69	Poecilia gillii	Ingroup	6826	STRI-NFC 6826	Escudo de Veraguas-South side, Bocas del Toro	Escudo de Veraguas	Laguna de Chiriqui	Atlantic	Bocas del Toro	Panama	Pan	9.10222	-81.5617	EB-97-3	16 August 1997	Eldredge Bermingham	muscle plug in DMSO (orig.); then 95% EtOH	P. mexicana	Clade 8a	8	P. mexicana	KP699855	This study	KP700430	This study
70	Poecilia sp.	Ingroup	7731	STRI-NFC 7731	Río Pachipa, San Antonio Suchitepeque	Río Nahualate	Río Nahualate	Pacific	Suchitepéquez	Guatemala	Guat	14.5034	-91.4077	AP-98-2	21 March 1998	Anabel Perdices	N/A	P. catemaconis/sphenops	Clade 2 - 2a Catemaco	2a	P. catemaconis (catemaconis + "sphenops" sp. 1)	KP699869	This study	N/A	N/A
71	Poecilia sp.	Ingroup	7780	STRI-NFC 7780	Río Sinacapa, 9 km from Guanagasapa	Río Sinacapa	Río Maria Linda	Atlantic	Escuintla	Guatemala	Guat	14.2019	-90.7076	AP-98-6	22 March 1998	Anabel Perdices	N/A	P. catemaconis/sphenops	Clade 2 - 2a Catemaco	2a	P. catemaconis (catemaconis + "sphenops" sp. 1)	KP699870	This study	N/A	N/A
72	Poecilia sp.	Ingroup	8181	STRI-NFC 8181	Río Amatillo at Lago Izabal near Venta de El Amatillo	Río Amatillo	Río Polochic	Atlantic	Izabal	Guatemala	Guat	15.5391	-88.8983	AP-98-28	1 April 1998	Anabel Perdices	N/A	P. mexicana	Clade 8c	8	P. mexicana	KP699892	This study	N/A	N/A
73	Poecilia sp.	Ingroup	8184	STRI-NFC 8184	Río Amatillo at Lago Izabal near Venta de El Amatillo	Río Amatillo	Río Polochic	Atlantic	Izabal	Guatemala	Guat	15.5391	-88.8983	AP-98-28	1 April 1998	Anabel Perdices	N/A	P. mexicana	Clade 8c	8	P. mexicana	KP699893	This study	KP700431	This study
74	Poecilia sp.	Ingroup	8288	STRI-NFC 8288	Río Chaguacal, trib. to Río Polochic	Río Chaguacal	Río Polochic	Atlantic	Alta Verapaz	Guatemala	Guat	15.3162	-89.8556	AP-98-32	2 April 1998	Anabel Perdices	N/A	P. mexicana	Clade 8c	8	P. mexicana	KP699903	This study	KP700432	This study
75	Poecilia sp.	Ingroup	8289	STRI-NFC 8289	Río Chaguacal, trib. to Río Polochic	Río Chaguacal	Río Polochic	Atlantic	Alta Verapaz	Guatemala	Guat	15.3162	-89.8556	AP-98-32	2 April 1998	Anabel Perdices	N/A	P. mexicana	Clade 8c	8	P. mexicana	KP699904	This study	KP700433	This study
76	Poecilia sp.	Ingroup	8290	STRI-NFC 8290	Río Chaguacal, trib. to Río Polochic	Río Chaguacal	Río Polochic	Atlantic	Alta Verapaz	Guatemala	Guat	15.3162	-89.8556	AP-98-32	2 April 1998	Anabel Perdices	N/A	P. mexicana	Clade 8c	8	P. mexicana	KP699905	This study	KP700434	This study
77	Poecilia sp.	Ingroup	8294	STRI-NFC 8294	Río Chaguacal, trib. to Río Polochic	Río Chaguacal	Río Polochic	Atlantic	Alta Verapaz	Guatemala	Guat	15.3162	-89.8556	AP-98-32	2 April 1998	Anabel Perdices	N/A	P. mexicana	Clade 8c	8	P. mexicana	KP699906	This study	KP700435	This study
78	Poecilia sp.	Ingroup	8314	STRI-NFC 8314	Río Lempa at Lempa/ Nueva Ocotepeque	Río Lempa	Río Lempa	Pacific	Ocotopeque	Honduras	Hon	14.3942	-89.2082	AP-98-34	10 April 1998	Anabel Perdices	N/A	P. sphenops	Clade 2 - 2b	2b	P. sphenops	KP699909	This study	KP700436	This study
79	Poecilia sp.	Ingroup	8516	KUIT 8516	Lagoon connecting two estuaries approximately 3.2 km southwest of Llano Los Patos, and due south of La Leona, Provincia de La Union (at a broader scale, ~11 km west of Punta de Amapala)	Pacific Ocean	Pacific Ocean	Pacific	La Unión	El Salvador	ES	13.1686	-88.0048	N/A	17 June 2008	Andrew C. Bentley, Lara Karla	N/A	P. mexicana	Clade 8b	8	P. mexicana	N/A	N/A	KP700437	This study
80	Poecilia sp.	Ingroup	8517	KUIT 8517	Lagoon connecting two estuaries approximately 3.2 km southwest of Llano Los Patos, and due south of La Leona, Provincia de La Union (at a broader scale, ~11 km west of Punta de Amapala)	Pacific Ocean	Pacific Ocean	Pacific	La Unión	El Salvador	ES	13.1686	-88.0048	N/A	17 June 2008	Andrew C. Bentley, Lara Karla	N/A	P. mexicana	Clade 8b	8	P. mexicana	N/A	N/A	KP700438	This study
81	Poecilia hondurensis	Ingroup	8520	STRI-NFC 8520	Quebrada De Chicho between Comunidades de Achiote and Cholomena at A	Quebrada de Chico	Río Aguán	Atlantic	Colón	Honduras	Hon	15.5348	-86.2117	AP-98-43	12 April 1998	Anabel Perdices	N/A	P. hondurensis	Clade 4	4	P. hondurensis	KP699936	This study	N/A	N/A
82	Poecilia hondurensis	Ingroup	8568	STRI-NFC 8568	Río Taujica at Taujica	Río Taujica	Río Aguán	Atlantic	Colón	Honduras	Hon	15.681	-85.9393	AP-98-44	13 April 1998	Anabel Perdices	N/A	P. hondurensis	Clade 4	4	P. hondurensis	KP699941	This study	N/A	N/A
83	Poecilia mexicana (P. m. mexicana)	Ingroup	8607	STRI-NFC 8607	Río Medina at Río Aguán near Coyoles Centrales, approximately 8 km W of Olanchito	Río Medina	Río Aguán	Atlantic	Yoro	Honduras	Hon	15.4838	-86.666	AP-98-45	13 April 1998	Anabel Perdices	N/A	P. mexicana	Clade 8c	8	P. mexicana	KP699942	This study	KP700439	This study
84	Poecilia sp.	Ingroup	8706	STRI-NFC 8706	Quebrada de Mercado at Río Guayambre, trib. to Río Patuca, near La Cruz	Quebrada de Mercado	Río Patuca	Atlantic	Olancho	Honduras	Hon	14.3563	-86.0652	AP-98-49	16 April 1998	Anabel Perdices	N/A	P. gilii	Clade 5b	5b+c	Poecilia gillii (P. gillii, P. sp. "Patuca")	KP699955	This study	N/A	N/A
85	Poecilia mexicana (P. m. mexicana)	Ingroup	8722	STRI-NFC 8722	Quebrada Carrizal, trib. to Río Patuca, at Terrero Blanco	Quebrada Carrizal	Río Patuca	Atlantic	Olancho	Honduras	Hon	14.4129	-86.0401	AP-98-50	16 April 1998	Anabel Perdices	N/A	P. gilii	Clade 5b	5b+c	Poecilia gillii (P. gillii, P. sp. "Patuca")	KP699958	This study	KP700440	This study
86	Poecilia mexicana (P. m. mexicana)	Ingroup	8747	STRI-NFC 8747	Río Tepemechin, trib. to Río Patuca, at Tepemechin	Río Tepemechin	Río Patuca	Atlantic	Olancho	Honduras	Hon	14.4018	-85.9301	AP-98-51	17 April 1998	Anabel Perdices	N/A	P. gilii	Clade 5b	5b+c	Poecilia gillii (P. gillii, P. sp. "Patuca")	KP699959	This study	KP700441	This study
87	Poecilia mexicana (P. m. mexicana)	Ingroup	8770	STRI-NFC 8770	Quebrada San Jose at Guayape / San Francisco de Becerra	Quebrada San Jose	Río Patuca	Atlantic	Olancho	Honduras	Hon	14.6276	-86.1424	AP-98-52	17 April 1998	Anabel Perdices	N/A	P. gilii	Clade 5b	5b+c	Poecilia gillii (P. gillii, P. sp. "Patuca")	KP699960	This study	KP700442	This study
88	Poecilia mexicana (P. m. mexicana)	Ingroup	8772	STRI-NFC 8772	Quebrada San Jose at Guayape / San Francisco de Becerra	Quebrada San Jose	Río Patuca	Atlantic	Olancho	Honduras	Hon	14.6276	-86.1424	AP-98-52	17 April 1998	Anabel Perdices	N/A	P. gilii	Clade 5b	5b+c	Poecilia gillii (P. gillii, P. sp. "Patuca")	KP699962	This study	KP700443	This study
89	Poecilia mexicana (P. m. mexicana)	Ingroup	8774	STRI-NFC 8774	Quebrada San Jose at Guayape / San Francisco de Becerra	Quebrada San Jose	Río Patuca	Atlantic	Olancho	Honduras	Hon	14.6276	-86.1424	AP-98-52	17 April 1998	Anabel Perdices	N/A	P. gilii	Clade 5b	5b+c	Poecilia gillii (P. gillii, P. sp. "Patuca")	KP699963	This study	KP700444	This study
90	Poecilia sp.	Ingroup	8859	STRI-NFC 8859	Río Goascorán at Caridad	Río Goascorán	Río Goascorán	Pacific	Valle	Honduras	Hon	13.8277	-87.6948	AP-98-55	18 April 1998	Anabel Perdices	N/A	P. sphenops	Clade 2 - 2b	2b	P. sphenops	KP699970	This study	KP700445	This study
91	Poecilia gillii	Ingroup	938	STRI-NFC 938	Río Bayano-B	Río Bayano	Río Bayano	Pacific	Panamá	Panama	Pan	9.177	-78.7457	EB-93-34	20 November 1993	Eldredge Bermingham	muscle plug in DMSO	P. gilii	Clade 5c	5b+c	Poecilia gillii (P. gillii, P. sp. "Patuca")	KP699793	This study	KP700417	This study
92	Poecilia gillii	Ingroup	9773	STRI-NFC 9773	Río San Juan at Coclecito	Río San Juan (Pan)	Río Cocle del Norte	Atlantic	Colón	Panama	Pan	8.80417	-80.5808	EB-99-2	6 March 1999	Eldredge Bermingham	N/A	P. mexicana	Clade 8a	8	P. mexicana	KP699987	This study	KP700446	This study
93	Poecilia gillii	Ingroup	PG608.02	MLBM 118861	Río Sabalito, trib. to Lake Arenal (west side),1.5 km SE of Sabalito on CR Rd 142	Río San Carlos	Río San Juan	Atlantic	Guanacaste	Costa Rica	CR	10.5486	-84.9808	06-08	2006	Jared B. Lee, Jerald B. Johnson	whole fish in 95% ethanol	P. mexicana	Clade 8k	8	P. mexicana	FJ446181	This study	KP700497	This study
94	Poecilia gillii	Ingroup	PG608.03	MLBM 119009	Río Sabalito, trib. to Lake Arenal (west side),1.5 km SE of Sabalito on CR Rd 142	Río San Carlos	Río San Juan	Atlantic	Guanacaste	Costa Rica	CR	10.5486	-84.9808	06-08	2006	Jared B. Lee, Jerald B. Johnson	whole fish in 95% ethanol	P. mexicana	Clade 8k	8	P. mexicana	FJ446182	This study	KP700498	This study
95	Poecilia gillii	Ingroup	PG610.03	MLBM 119010	Small ditch at Hwy 927, trib. to Río Corobici	Río Bebedero	Río Tempisque	Pacific	Guanacaste	Costa Rica	CR	10.6241	-85.0581	06-10	2006	Jared B. Lee, Jerald B. Johnson	whole fish in 95% ethanol	P. mexicana	Clade 8m	8	P. mexicana	FJ446187	This study	KP700499	This study
96	Poecilia gillii	Ingroup	PG611.03	MLBM 119011	Quebrada Homiguera, trib. to Río Tenorio	Río Bebedero	Río Tempisque	Pacific	Guanacaste	Costa Rica	CR	10.6909	-85.0837	06-10	2006	Jared B. Lee, Jerald B. Johnson	whole fish in 95% ethanol	P. mexicana	clade 8m	8	P. mexicana	FJ446190	This study	KP700500	This study
97	Poecilia gillii	Ingroup	PG611.04	MLBM 235127	Quebrada Homiguera, trib. to Río Tenorio	Río Bebedero	Río Tempisque	Pacific	Guanacaste	Costa Rica	CR	10.6909	-85.0837	06-11	2006	Jared B. Lee, Jerald B. Johnson	whole fish in 95% ethanol	P. mexicana	Clade 8l	8	P. mexicana	FJ446191	This study	KP700501	This study
98	Poecilia gillii	Ingroup	PG701.02	MLBM 235185	Trib. to Río Reventazon at Rd. 232 across from Angostura Lagoon	Río Reventazon	Río Reventazon	Atlantic	Cartago	Costa Rica	CR	9.8723	-83.6332	07-01	2007	Jared B. Lee, Jerald B. Johnson	whole fish in 95% ethanol	P. mexicana	Clade 8j	8	P. mexicana	FJ446208	This study	KP700502	This study
99	Poecilia gillii	Ingroup	PG701.05	MLBM 235368	Trib. to Río Reventazon at Rd. 232 across from Angostura Lagoon	Río Reventazon	Río Reventazon	Atlantic	Cartago	Costa Rica	CR	9.8723	-83.6332	07-03	2007	Jared B. Lee, Jerald B. Johnson	whole fish in 95% ethanol	P. mexicana	Clade 8b	8	P. mexicana	FJ446211	This study	KP700503	This study
100	Poecilia gillii	Ingroup	PG703.01	MLBM 235186	Río Herediana at CR Hwy 32, approximately 3 km northwest of Siquirres	Río Herediana	Río Parismina	Atlantic	Limón	Costa Rica	CR	10.1242	-83.5562	07-03	2007	Jared B. Lee, Jerald B. Johnson	whole fish in 95% ethanol	P. mexicana	Clade 8l	8	P. mexicana	FJ446212	This study	KP700504	This study
101	Poecilia gillii	Ingroup	PG704.02	MLBM 235177	Unnamed trib. to Río Sixaola, ~3 km NE of Bribri, CR, on CR Hwy 36	Río Sixaola	Río Sixaola	Atlantic	Limón	Costa Rica	CR	9.63203	-82.8192	07-04	2007	Jared B. Lee, Jerald B. Johnson	whole fish in 95% ethanol	P. mexicana	Clade 8i	8	P. mexicana	FJ446218	This study	KP700505	This study
102	Poecilia gillii	Ingroup	PG706.03	MLBM 235226	Río Carbon at Rd. 801 just across from Colegio Técnico Profesional Talamanca, in Bribri	Río Carbon	Río Sixaola	Atlantic	Limón	Costa Rica	CR	9.62312	-82.8552	07-06	17 May 2007	Jared B. Lee, Jerald B. Johnson	whole fish in 95% ethanol	P. mexicana	Clade 8f	8	P. mexicana	FJ446227	This study	KP700506	This study
103	Poecilia gillii	Ingroup	PG713.10	MLBM 235419	Río Sarapiqui off Rd. 505 approximately 7.2 km northwest of Puerto Viejo de Sarapiqui	Río Sarapiqui	Río Sarapiqui	Atlantic	Heredia	Costa Rica	CR	10.5245	-84.0313	07-13	2007	Jared B. Lee, Jerald B. Johnson	whole fish in 95% ethanol	P. mexicana	Clade 8m	8	P. mexicana	FJ446280	This study	KP700507	This study
104	Poecilia gillii	Ingroup	PG715.02	MLBM 235197	Río Infiernito off dirt road, 3 km east of CR Hwy 35, after traveling approximately 6.5 km north of Boca Arenal	Río Infernito	Río San Juan	Atlantic	Alajuela	Costa Rica	CR	10.618	-84.4842	07-15	2007	Jared B. Lee, Jerald B. Johnson	whole fish in 95% ethanol	P. mexicana	clade 8m	8	P. mexicana	FJ446285	This study	KP700508	This study
105	Poecilia gillii	Ingroup	PG722.10	MLBM 235450	Río Marole at CR Hwy 21, Nicoya Peninsula (drains to Golfo de Nicoya)	Río Marole	Río Marole	Pacific	Guanacaste	Costa Rica	CR	10.0583	-85.262	07-22	2007	Jared B. Lee, Jerald B. Johnson	whole fish in 95% ethanol	P. mexicana	Clade 8m	8	P. mexicana	FJ446325	This study	KP700509	This study
106	Poecilia gillii	Ingroup	PG724.05	MLBM 235458	Río Irigary at Pan American Hwy (CA 1), at Irigary	Río Irigary	Río Tempisque	Pacific	Guanacaste	Costa Rica	CR	10.7234	-85.5104	07-24	2007	Jared B. Lee, Jerald B. Johnson	whole fish in 95% ethanol	P. mexicana	Clade 8m	8	P. mexicana	FJ446337	This study	KP700510	This study
107	Poecilia gillii	Ingroup	PG724.12	MLBM 235465	Río Irigary at Pan American Hwy (CA 1), at Irigary	Río Irigary	Río Tempisque	Pacific	Guanacaste	Costa Rica	CR	10.7234	-85.5104	07-24	2007	Jared B. Lee, Jerald B. Johnson	whole fish in 95% ethanol	P. mexicana	Clade 8k	8	P. mexicana	FJ446344	This study	KP700511	This study
108	Poecilia gillii	Ingroup	PG725.04	MLBM 235472	Río Sapoa just north of CR Hwy 4, approximately 2 km southeast of La Cruz	Lago Nicaragua	Río San Juan	Atlantic	Guanacaste	Costa Rica	CR	11.0444	-85.6159	07-25	2007	Jared B. Lee, Jerald B. Johnson	whole fish in 95% ethanol	P. mexicana	Clade 8m	8	P. mexicana	FJ446351	This study	KP700512	This study
109	Poecilia gillii	Ingroup	PG725.05	MLBM 235473	Río Sapoa just north of CR Hwy 4, approximately 2 km southeast of La Cruz	Lago Nicaragua	Río San Juan	Atlantic	Guanacaste	Costa Rica	CR	11.0444	-85.6159	07-25	2007	Jared B. Lee, Jerald B. Johnson	whole fish in 95% ethanol	P. mexicana	Clade 8m	8	P. mexicana	FJ446352	This study	KP700513	This study
110	Poecilia gillii	Ingroup	PG806.04	MLBM 129621	Río Centeno at Rd. 131, approximately 1.6 km west of San Mateo	Río Centeno	Río Barranca	Pacific	Alajuela	Costa Rica	CR	9.94132	-84.5389	08-06	2008	Jared B. Lee, Jerald B. Johnson	whole fish in 95% ethanol	P. mexicana	Clade 8m	8	P. mexicana	FJ446378	This study	KP700514	This study
111	Poecilia gillii	Ingroup	PGB701.02	MLBM 235185	Trib. to Río Reventazon at Rd. 232 across from Angostura Lagoon	Río Reventazon	Río Reventazon	Atlantic	Cartago	Costa Rica	CR	9.8723	-83.6332	MB 07-01	2007	Mark C. Belk	whole fish in 95% ethanol	P. mexicana	Clade 8d	8	P. mexicana	FJ446208	This study	KP700515	This study
112	Poecilia gillii	Ingroup	PGB702.01	MLBM 235216	Unnamed trib at CR Hwy 239, in between Las Lomas and Finca La Palma, ~0.25 km NW of Finca La Palma	Estero Palma (Río Palma)	Estero Palma (Río Palma)	Pacific	Puntarenas	Costa Rica	CR	9.53697	-84.3859	MB 07-02	2007	Mark C. Belk	whole fish in 95% ethanol	P. mexicana	Clade 8d	8	P. mexicana	FJ446400	This study	KP700516	This study
113	Poecilia gillii	Ingroup	PGB704.02	N/A	Unnamed trib. to Río Sixaola at CR Hwy 36, ~3.2 km NE of Bribri, CR	Río Sixaola	Río Sixaola	Atlantic	Limón	Costa Rica	CR	9.63203	-82.8192	MB 07-04	2007	Mark C. Belk	whole fish in 95% ethanol	P. mexicana	Clade 8d	8	P. mexicana	KP700408	This study	KP700517	This study
114	Poecilia latipinna	Outgroup5	Platip	N/A	N/A	N/A	N/A	Atlantic	N/A	Mexico	Mex	N/A	N/A	N/A	N/A	Michael Tobler	whole fish in 95% ethanol	sail-fin mollies	Outgroup	–	–	EF017539	This study	KP700518	This study
115	Poecilia latipunctata	Outgroup6	Platipun	N/A	N/A	N/A	N/A	Atlantic	N/A	Mexico	Mex	N/A	N/A	N/A	N/A	Michael Tobler	whole fish in 95% ethanol	sail-fin mollies	Outgroup	–	–	KP700411	This study	KP700519	This study
116	Micropoecilia picta	Outgroup7	Ppict	N/A	N/A	N/A	N/A	Atlantic	N/A	Trinidad	Trin	N/A	N/A	N/A	N/A	Michael Tobler	whole fish in 95% ethanol	M. picta	Outgroup	–	–	KP700412	This study	KP700520	This study
117	Poecilia reticulata	Outgroup8	Pret	N/A	N/A	N/A	N/A	Atlantic	N/A	Trinidad	Trin	N/A	N/A	N/A	N/A	Michael Tobler	whole fish in 95% ethanol	P. reticulata	Outgroup	–	–	KP700413	This study	KP700521	This study
118	Poecilia salvatoris	Ingroup	Psalv	N/A	N/A	N/A	N/A	N/A	N/A	Honduras	Hon	N/A	N/A	N/A	N/A	Michael Tobler	whole fish in 95% ethanol	P. mexicana	Clade 8c	8	P. mexicana	N/A	N/A	KP700522	This study
119	Poecilia caucana	Outgroup1	Pcauc	N/A	N/A	N/A	N/A	Atlantic	N/A	Trinidad	Trin	N/A	N/A	N/A	N/A	Michael Tobler	whole fish in 95% ethanol	P. caucana	Outgroup	–	–	KP700406	This study	N/A	N/A
120	Poecilia latipinna	Outgroup9	PlatJBLee	Lee & Johnson (2009)	N/A	N/A	N/A	Atlantic	N/A	Costa Rica	CR	N/A	N/A	N/A	N/A	Jared B. Lee	whole fish in 95% ethanol	sail-fin mollies	Outgroup	–	–	FJ446153	Lee & Johnson (2009)	N/A	N/A
121	Poecilia reticulata	Outgroup10	4289	N/A	N/A	N/A	N/A	Atlantic	N/A	Trinidad	Trin	N/A	N/A	N/A	N/A	N/A	N/A	P. reticulata	Outgroup	–	–	KP699837	This study	N/A	N/A
122	Poecilia reticulata	Outgroup11	4290	N/A	N/A	N/A	N/A	Atlantic	N/A	Trinidad	Trin	N/A	N/A	N/A	N/A	N/A	N/A	P. reticulata	Outgroup	–	–	KP699838	This study	N/A	N/A
123	Poecilia butleri	Ingroup	Pbut	Zuñiga-Vega et al. (2014)	N/A	N/A	N/A	N/A	N/A	Mexico	Mex	N/A	N/A	N/A	N/A	Zuñiga-Vega et al. (2014)	N/A	P. butleri	Clade 6 butleri	6	P. butleri	JN368093	Zuñiga-Vega et al. (2014)	N/A	N/A
124	Poecilia latipinna	Outgroup12	8112	N/A	N/A	N/A	N/A	N/A	N/A	Mexico	Mex	N/A	N/A	N/A	N/A	N/A	N/A	P. latipinna	Outgroup	–	–	KP699889	This study	N/A	N/A
125	Poecilia catemaconis	Ingroup	Pcatemac	N/A	N/A	N/A	N/A	Atlantic	N/A	Mexico	Mex	N/A	N/A	N/A	N/A	N/A	N/A	P. catemaconis	Clade 2 - 2a Catemaco	2a	P. catemaconis (catemaconis + "sphenops" sp. 1)	KP700405	This study	N/A	N/A
126	Xiphophorus helleri	Outgroup13	Xhell	Hrbek et al. (2007)	N/A	N/A	N/A	N/A	N/A	Mexico	Mex	N/A	N/A	N/A	N/A	Hrbek et al. (2007)	N/A	X. helleri	Outgroup	–	–	EF017548	Hrbek et al. (2007)	N/A	N/A
127	Xiphophorus maculatus	Outgroup14	Xmac	Hrbek et al. (2007)	N/A	N/A	N/A	N/A	N/A	Mexico	Mex	N/A	N/A	N/A	N/A	Hrbek et al. (2007)	N/A	X. maculatus	Outgroup	–	–	EF017551	Hrbek et al. (2007)	N/A	N/A
128	Belonesox belizanus	Outgroup15	Bbeliz	Hrbek et al. (2007)	N/A	N/A	N/A	N/A	N/A	N/A	N/A	N/A	N/A	N/A	N/A	Hrbek et al. (2007)	N/A	B. belizanus	Outgroup	–	–	EF017519	Hrbek et al. (2007)	N/A	N/A
129	Limia dominicensis	Outgroup16	Ldom	Hrbek et al. (2007)	N/A	N/A	N/A	Atlantic	N/A	Haiti/Dominican Republic	Ha/DR	N/A	N/A	N/A	N/A	Hrbek et al. (2007)	N/A	L. dominicensis	Outgroup	–	–	EF017533	Hrbek et al. (2007)	N/A	N/A
130	Limia melanogaster	Outgroup17	Lmela	Hrbek et al. (2007)	N/A	N/A	N/A	Atlantic	N/A	Haiti/Jamaica	Ha/Jam	N/A	N/A	N/A	N/A	Hrbek et al. (2007)	N/A	L. melanogaster	Outgroup	–	–	EF017534	Hrbek et al. (2007)	N/A	N/A
131	Limia tridens	Outgroup18	Ltrid	Hrbek et al. (2007)	N/A	N/A	N/A	Atlantic	N/A	Haiti/Dominican Republic	Ha/DR	N/A	N/A	N/A	N/A	Hrbek et al. (2007)	N/A	L. tridens	Outgroup	–	–	EF017535	Hrbek et al. (2007)	N/A	N/A
132	Limia vittata	Outgroup19	LvitCU153	Doadrio et al. (2009)	N/A	N/A	N/A	Atlantic	N/A	Cuba	Cub	N/A	N/A	N/A	N/A	Doadrio et al. (2009)	N/A	L. vittata	Outgroup	–	–	FJ178765	Doadrio et al. (2009)	N/A	N/A
133	Limia vittata	Outgroup20	LvitC197	Doadrio et al. (2009)	N/A	N/A	N/A	Atlantic	N/A	Cuba	Cub	N/A	N/A	N/A	N/A	Doadrio et al. (2009)	N/A	L. vittata	Outgroup	–	–	FJ178766	Doadrio et al. (2009)	N/A	N/A
134	Limia heterandria	Outgroup21	Lheteran	Meredith et al. (2011)	N/A	N/A	N/A	Atlantic	N/A	Venezuela	Ven	N/A	N/A	N/A	N/A	Meredith et al. (2011)	N/A	L. heterandria	Outgroup	–	–	HQ857426	Meredith et al. (2011)	N/A	N/A
135	Poecilia m. limantouri	Ingroup	PmlSnPe_0	Palacios et al. (2013)	San Pedro, in Hidalgo state (georeferenced to river at Ruta 106 just north of San Pedro)	Río Panuco	Río Panuco	Atlantic	N/A	Mexico	Mex	20.1675	-98.2618	N/A	N/A	Palacios et al. (2013)	N/A	uncertain (P. sulphuraria, P. thermalis, P. m. limantouri)	Clade 7b	7	uncertain (P. sulphuraria, P. thermalis, P. m. limantouri)	KF276635	Palacios et al. (2013)	N/A	N/A
136	Poecilia m. limantouri	Ingroup	PmlmPep_0	Palacios et al. (2013)	Pepeyocatitla, in Hidalgo state (georeferenced to river at major road just east of Pepeyocatitla)	Río Panuco	Río Panuco	Atlantic	N/A	Mexico	Mex	20.9128	-98.392	N/A	N/A	Palacios et al. (2013)	N/A	uncertain (P. sulphuraria, P. thermalis, P. m. limantouri)	Clade 7b	7	uncertain (P. sulphuraria, P. thermalis, P. m. limantouri)	KF276634	Palacios et al. (2013)	N/A	N/A
137	Poecilia mexicana (P. m. mexicana)	Ingroup	PmmxIxt3_0	Palacios et al. (2013)	Río Ixtapangajoya, Chiapas state	Río Ixtapangajoya	Río Ixtapangajoya	Atlantic	N/A	Mexico	Mex	17.495	-92.998	N/A	N/A	Palacios et al. (2013)	N/A	P. mexicana	Clade 8c	8	P. mexicana	KF276633	Palacios et al. (2013)	N/A	N/A
138	Poecilia mexicana (P. m. mexicana)	Ingroup	PmmxIxta_0	Palacios et al. (2013)	Río Ixtapangajoya, Chiapas state	Río Ixtapangajoya	Río Ixtapangajoya	Atlantic	N/A	Mexico	Mex	17.495	-92.998	N/A	N/A	Palacios et al. (2013)	N/A	P. mexicana	Clade 8c	8	P. mexicana	KF276631	Palacios et al. (2013)	N/A	N/A
139	Poecilia mexicana (P. m. mexicana)	Ingroup	PmmxNSS2_0	Palacios et al. (2013)	Tributary to Río Ixtapangajoya, Chiapas state	Unnamed trib.	Río Ixtapangajoya	Atlantic	N/A	Mexico	Mex	17.51	-92.98	N/A	N/A	Palacios et al. (2013)	N/A	P. mexicana	Clade 8c	8	P. mexicana	KF276630	Palacios et al. (2013)	N/A	N/A
140	Poecilia sulphuraria	Ingroup	PslLaGl3_0	Palacios et al. (2013)	La Gloria	Río Pichucalco	Río Pichucalco	Atlantic	N/A	Mexico	Mex	17.532	-93.0151	N/A	N/A	Palacios et al. (2013)	N/A	uncertain (P. sulphuraria, P. thermalis, P. m. limantouri)	Clade 7a	7	uncertain (P. sulphuraria, P. thermalis, P. m. limantouri)	KF276628	Palacios et al. (2013)	N/A	N/A
141	Poecilia sulphuraria	Ingroup	PslBan3_0	Palacios et al. (2013)	Baños del Azufre	Río Pichucalco	Río Pichucalco	Atlantic	N/A	Mexico	Mex	17.552	-92.999	N/A	N/A	Palacios et al. (2013)	N/A	uncertain (P. sulphuraria, P. thermalis, P. m. limantouri)	Clade 7a	7	uncertain (P. sulphuraria, P. thermalis, P. m. limantouri)	KF276625	Palacios et al. (2013)	N/A	N/A
142	Poecilia sulphuraria	Ingroup	PslBan2_0	Palacios et al. (2013)	Baños del Azufre	Río Pichucalco	Río Pichucalco	Atlantic	N/A	Mexico	Mex	17.552	-92.999	N/A	N/A	Palacios et al. (2013)	N/A	uncertain (P. sulphuraria, P. thermalis, P. m. limantouri)	Clade 7a	7	uncertain (P. sulphuraria, P. thermalis, P. m. limantouri)	KF276624	Palacios et al. (2013)	N/A	N/A
143	Poecilia sulphuraria	Ingroup	PslBanos_0	Palacios et al. (2013)	Baños del Azufre	Río Pichucalco	Río Pichucalco	Atlantic	N/A	Mexico	Mex	17.552	-92.999	N/A	N/A	Palacios et al. (2013)	N/A	uncertain (P. sulphuraria, P. thermalis, P. m. limantouri)	Clade 7a	7	uncertain (P. sulphuraria, P. thermalis, P. m. limantouri)	KF276623	Palacios et al. (2013)	N/A	N/A
144	Poecilia mexicana (P. m. mexicana)	Ingroup	PmmxPysp_0	Palacios et al. (2013)	Puyacatengo Springs, in Tabasco state	Río Puyacatengo	Río Puyacatengo	Atlantic	N/A	Mexico	Mex	17.458	-92.889	N/A	N/A	Palacios et al. (2013)	N/A	P. mexicana	Clade 8c	8	P. mexicana	KF276616	Palacios et al. (2013)	N/A	N/A
145	Poecilia mexicana (P. m. mexicana)	Ingroup	PmmxCDA_0	Palacios et al. (2013)	Cueva del Azufre, Tabasco state	Río Tacotalpa	Río Tacotalpa	Atlantic	N/A	Mexico	Mex	17.4384	-92.7748	N/A	N/A	Palacios et al. (2013)	N/A	P. mexicana	Clade 8c	8	P. mexicana	KF276615	Palacios et al. (2013)	N/A	N/A
146	Poecilia butleri	Ingroup	Pbut4_0	Palacios et al. (2013)	Laguna de San Pedro Lagunillas at San Pedro Lagunillas, in Nayarit state	Pacific	Pacific	Pacific	N/A	Mexico	Mex	21.2141	-104.738	N/A	N/A	Palacios et al. (2013)	N/A	P. butleri	Clade 6 butleri	6	P. butleri	KF276614	Palacios et al. (2013)	N/A	N/A
147	Poecilia sphenops	Ingroup	Psp2S_0	Palacios et al. (2013)	Suchiapa, in Chiapas	Río Grijalva	Río Grijalva	Atlantic	N/A	Mexico	Mex	16.6108	-93.0845	N/A	N/A	Palacios et al. (2013)	N/A	P. sphenops	Clade 2 - 2a Catemaco	2a	P. catemaconis (catemaconis + "sphenops" sp. 1)	KF276612	Palacios et al. (2013)	N/A	N/A
148	Poecilia catemaconis	Ingroup	Pcat_0	Palacios et al. (2013)	Lake Catemaco	Río Grande de Catemaco	Río Grande de Catemaco	Atlantic	N/A	Mexico	Mex	18.3833	-95.1228	N/A	N/A	Palacios et al. (2013)	N/A	P. catemaconis/sphenops	Clade 2 - 2a Catemaco	2a	P. catemaconis (catemaconis + "sphenops" sp. 1)	KF276610	Palacios et al. (2013)	N/A	N/A
149	Poecilia latipinna	Outgroup2	Plati_0	Palacios et al. (2013)	N/A	N/A	N/A	Atlantic	N/A	N/A	–	N/A	N/A	N/A	N/A	Palacios et al. (2013)	N/A	P. latipinna	Outgroup	–	P. latipinna	KF276609	Palacios et al. (2013)	N/A	N/A
150	Poecilia sphenops	Ingroup	Psphe35	Tobler et al. (2011)	Río Coatzocoalcos, Arroyo Prieto	Coatzocoalcos	Río Coatzocoalcos	Atlantic	N/A	Mexico	Mex	N/A	N/A	N/A	N/A	Tobler et al. (2011)	N/A	P. sphenops	Clade 2 - 2a Catemaco	2a	P. catemaconis (catemaconis + "sphenops" sp. 1)	HQ677898	Tobler et al. (2011)	N/A	N/A
151	Poecilia mexicana (P. m. mexicana)	Ingroup	Pmmex30	Tobler et al. (2011)	Río Tacotalpa, Arroyo Tres	Río Tacotalpa	Río Tacotalpa	Atlantic	N/A	Mexico	Mex	17.484	-92.776	N/A	N/A	Tobler et al. (2011)	N/A	P. mexicana	Clade 8c	8	P. mexicana	HQ677893	Tobler et al. (2011)	N/A	N/A
152	Poecilia mexicana (P. m. mexicana)	Ingroup	Pmmex29	Tobler et al. (2011)	Río Nututun, Palenque	Río Nututun	Río Nututun	Atlantic	N/A	Mexico	Mex	17.4842	-91.9738	N/A	N/A	Tobler et al. (2011)	N/A	P. mexicana	Clade 8c	8	P. mexicana	HQ677892	Tobler et al. (2011)	N/A	N/A
153	Poecilia mexicana (P. m. mexicana)	Ingroup	Pmmex28	Tobler et al. (2011)	Río Oxolotan, Tapijulapa	Río Oxolotan	Río Oxolotan	Atlantic	N/A	Mexico	Mex	17.4644	-92.7743	N/A	N/A	Tobler et al. (2011)	N/A	P. mexicana	Clade 8c	8	P. mexicana	HQ677891	Tobler et al. (2011)	N/A	N/A
154	Poecilia mexicana (P. m. mexicana)	Ingroup	Pmmex27	Tobler et al. (2011)	Río Tacotalpa, Arroyo Bonita	Río Tacotalpa	Río Tacotalpa	Atlantic	N/A	Mexico	Mex	17.4269	-92.7521	N/A	N/A	Tobler et al. (2011)	N/A	P. mexicana	Clade 8c	8	P. mexicana	HQ677890	Tobler et al. (2011)	N/A	N/A
155	Poecilia mexicana (P. m. mexicana)	Ingroup	Pmmex26	Tobler et al. (2011)	Río Tacotalpa, Arroyo Bonita	Río Tacotalpa	Río Tacotalpa	Atlantic	N/A	Mexico	Mex	17.4269	-92.7521	N/A	N/A	Tobler et al. (2011)	N/A	P. mexicana	Clade 8c	8	P. mexicana	HQ677889	Tobler et al. (2011)	N/A	N/A
156	Poecilia mexicana (P. m. mexicana)	Ingroup	Pmmex25	Tobler et al. (2011)	Río Pichaculco, Arroyo Rosita	Río Pichucalco	Río Pichucalco	Atlantic	N/A	Mexico	Mex	17.485	-93.104	N/A	N/A	Tobler et al. (2011)	N/A	P. mexicana	Clade 8c	8	P. mexicana	HQ677888	Tobler et al. (2011)	N/A	N/A
157	Poecilia mexicana (P. m. mexicana)	Ingroup	Pmmex23	Tobler et al. (2011)	Río Puyacatengo, La Lluvia	Río Puyacatengo	Río Puyacatengo	Atlantic	N/A	Mexico	Mex	17.464	-92.895	N/A	N/A	Tobler et al. (2011)	N/A	P. mexicana	Clade 8c	8	P. mexicana	HQ677886	Tobler et al. (2011)	N/A	N/A
158	Poecilia mexicana (P. m. mexicana)	Ingroup	Pmmex20	Tobler et al. (2011)	Río Puyacatengo, La Lluvia, Puyacatengo Springs	Río Puyacatengo	Río Puyacatengo	Atlantic	N/A	Mexico	Mex	17.4576	-92.8889	N/A	N/A	Tobler et al. (2011)	N/A	P. mexicana	Clade 8c	8	P. mexicana	HQ677883	Tobler et al. (2011)	N/A	N/A
159	Poecilia mexicana (P. m. mexicana)	Ingroup	Pmmex18	Tobler et al. (2011)	Río Puyacatengo, Vicente Gurrero Lerma	Río Puyacatengo	Río Puyacatengo	Atlantic	N/A	Mexico	Mex	17.5101	-92.9145	N/A	N/A	Tobler et al. (2011)	N/A	P. mexicana	Clade 8c	8	P. mexicana	HQ677881	Tobler et al. (2011)	N/A	N/A
160	Poecilia mexicana (P. m. mexicana)	Ingroup	Pmmex16	Tobler et al. (2011)	Río Pichucalco, Baños del Azufre	Río Pichucalco	Río Pichucalco	Atlantic	N/A	Mexico	Mex	17.5523	-92.9986	N/A	N/A	Tobler et al. (2011)	N/A	P. mexicana	Clade 8c	8	P. mexicana	HQ677879	Tobler et al. (2011)	N/A	N/A
161	Poecilia m. limantouri	Ingroup	Pmlim12	Tobler et al. (2011)	Río Soto la Marina, trib. to Río Palmas (georeferenced to Río Soto la Marina at Mexican Hwy 180, Soto la Marina, Tamaulipas)	Río Soto la Marina	Río Soto la Marina	Atlantic	N/A	Mexico	Mex	23.7606	-98.2061	N/A	N/A	Tobler et al. (2011)	N/A	uncertain (P. sulphuraria, P. thermalis, P. m. limantouri)	Clade 7b	7	uncertain (P. sulphuraria, P. thermalis, P. m. limantouri)	HQ677875	Tobler et al. (2011)	N/A	N/A
162	Poecilia m. limantouri	Ingroup	Pmlim11	Tobler et al. (2011)	Río Soto la Marina, trib. to Río Palmas (georeferenced to Río Soto la Marina at Mexican Hwy 180, Soto la Marina, Tamaulipas)	Río Soto la Marina	Río Soto la Marina	Atlantic	N/A	Mexico	Mex	23.7606	-98.2061	N/A	N/A	Tobler et al. (2011)	N/A	uncertain (P. sulphuraria, P. thermalis, P. m. limantouri)	Clade 7b	7	uncertain (P. sulphuraria, P. thermalis, P. m. limantouri)	HQ677874	Tobler et al. (2011)	N/A	N/A
163	Poecilia m. limantouri	Ingroup	Pmlim10	Tobler et al. (2011)	Río Soto la Marina, trib. to Río Palmas (georeferenced to Río Soto la Marina at Mexican Hwy 180, Soto la Marina, Tamaulipas)	Río Soto la Marina	Río Soto la Marina	Atlantic	N/A	Mexico	Mex	23.7606	-98.2061	N/A	N/A	Tobler et al. (2011)	N/A	uncertain (P. sulphuraria, P. thermalis, P. m. limantouri)	Clade 7b	7	uncertain (P. sulphuraria, P. thermalis, P. m. limantouri)	HQ677873	Tobler et al. (2011)	N/A	N/A
164	Poecilia m. limantouri	Ingroup	Pmlim9	Tobler et al. (2011)	Río Soto la Marina, trib. to Río Palmas (georeferenced to Río Soto la Marina at Mexican Hwy 180, Soto la Marina, Tamaulipas)	Río Soto la Marina	Río Soto la Marina	Atlantic	N/A	Mexico	Mex	23.7606	-98.2061	N/A	N/A	Tobler et al. (2011)	N/A	uncertain (P. sulphuraria, P. thermalis, P. m. limantouri)	Clade 7b	7	uncertain (P. sulphuraria, P. thermalis, P. m. limantouri)	HQ677872	Tobler et al. (2011)	N/A	N/A
165	Poecilia m. limantouri	Ingroup	Pmlim8	Tobler et al. (2011)	Río Soto la Marina, trib. to Río Palmas (georeferenced to Río Soto la Marina at Mexican Hwy 180, Soto la Marina, Tamaulipas)	Río Soto la Marina	Río Soto la Marina	Atlantic	N/A	Mexico	Mex	23.7606	-98.2061	N/A	N/A	Tobler et al. (2011)	N/A	uncertain (P. sulphuraria, P. thermalis, P. m. limantouri)	Clade 7b	7	uncertain (P. sulphuraria, P. thermalis, P. m. limantouri)	HQ677871	Tobler et al. (2011)	N/A	N/A
166	Poecilia m. limantouri	Ingroup	Pmlim7	Tobler et al. (2011)	Río Soto la Marina, trib. to Río Palmas (georeferenced to Río Soto la Marina at Mexican Hwy 180, Soto la Marina, Tamaulipas)	Río Soto la Marina	Río Soto la Marina	Atlantic	N/A	Mexico	Mex	23.7606	-98.2061	N/A	N/A	Tobler et al. (2011)	N/A	uncertain (P. sulphuraria, P. thermalis, P. m. limantouri)	Clade 7b	7	uncertain (P. sulphuraria, P. thermalis, P. m. limantouri)	HQ677870	Tobler et al. (2011)	N/A	N/A
167	Poecilia m. limantouri	Ingroup	Pmlim6	Tobler et al. (2011)	Río Soto la Marina, trib. to Río Palmas (georeferenced to Río Soto la Marina at Mexican Hwy 180, Soto la Marina, Tamaulipas)	Río Soto la Marina	Río Soto la Marina	Atlantic	N/A	Mexico	Mex	23.7606	-98.2061	N/A	N/A	Tobler et al. (2011)	N/A	uncertain (P. sulphuraria, P. thermalis, P. m. limantouri)	Clade 7b	7	uncertain (P. sulphuraria, P. thermalis, P. m. limantouri)	HQ677869	Tobler et al. (2011)	N/A	N/A
168	Poecilia latipinna	Outgroup3	Plat5	Tobler et al. (2011)	N/A	N/A	N/A	Atlantic	N/A	N/A	–	N/A	N/A	N/A	N/A	Tobler et al. (2011)	N/A	sail-fin mollies	Outgroup	–	–	HQ677868	Tobler et al. (2011)	N/A	N/A
169	Poecilia latipinna	Outgroup4	Plat4	Tobler et al. (2011)	N/A	N/A	N/A	Atlantic	N/A	N/A	–	N/A	N/A	N/A	N/A	Tobler et al. (2011)	N/A	sail-fin mollies	Outgroup	–	–	HQ677867	Tobler et al. (2011)	N/A	N/A
170	Poecilia butleri	Ingroup	Pbut2	Tobler et al. (2011)	Río Marabasco at Mexico Hwy 200, just east of Cihuatlan, Jalisco	Río Marabasco	Río Marabasco	Pacific	N/A	Mexico	Mex	19.2365	-104.554	N/A	N/A	Tobler et al. (2011)	N/A	P.butleri	Clade 6 butleri	6	P. butleri	HQ677865	Tobler et al. (2011)	N/A	N/A
171	Poecilia butleri	Ingroup	Pbut1	Tobler et al. (2011)	Estero San Cristobal at San Blas, Nayarit	Río San Cristobal	Estero San Cristobal	Pacific	N/A	Mexico	Mex	21.5447	-105.274	N/A	N/A	Tobler et al. (2011)	N/A	P.butleri	Clade 6 butleri	6	P. butleri	HQ677864	Tobler et al. (2011)	N/A	N/A

## Sheet: concatenated nDNA dataset
Concatenated nDNA dataset (n = 50)																								mtDNA		nDNA	Legend: 1=sequence; x=absent							mtDNA		nDNA	Legend: N/A, not available
	Species_ID	Ingroup / Outgroup	ID	Voucher No. / Reference	Locality	Drainage 1	Drainage 2	Slope	Province / Department	Country	Country code	Latitude	Longitude	Collection ID	Date	Collected by	Mode of preservation/notes	Taxon / lineage	CLADE	bGMYC groups	bGMYC-based taxonomy		Total sampling per gene:	Cytb	cox1	RPS7	Ldh-A	X-src	X-yes	Glyt		GenBank Numbers:		Cytb	cox1	RPS7	Ldh-A	X-src	X-yes	Glyt
1	Poecilia orri	Ingroup	08.2060	LSU backlog/WAM08-109	Island of Roatan, Bay Islands, off northern coast of Honduras	Roatan	Atlantic Ocean	Atlantic	Islas de la Bahía	Honduras	Hon	N/A	N/A	WAM08-109	2008	Wilfredo A. Matamoros	fin clip in 95% ethanol	P. mexicana	Clade 8c	8	P. mexicana			x	1	1	1	1	1	1				N/A	KP700414	KP700523	KP700817	KP700726	KP700885	KP700713
2			08.2060 allele 2																					N/A	N/A	1	1	1	x	x
3	Poecilia orri	Ingroup	08.2066	LSU backlog/WAM08-109	Island of Roatan, Bay Islands, off northern coast of Honduras	Roatan	Atlantic Ocean	Atlantic	Islas de la Bahía	Honduras	Hon	N/A	N/A	WAM08-109	2008	Wilfredo A. Matamoros	fin clip in 95% ethanol	P. mexicana	Clade 8c	8	P. mexicana			x	1	1	1	1	x	1				N/A	KP700416	KP700524	KP700819	KP700728	N/A	KP700714
4			08.2066 allele 2																					N/A	N/A	1	1	1	x	x
5	Poecilia gillii	Ingroup	11337	STRI-NFC 11337	Río Parti just south of CA 1, approximately 7 km E of Lago Bayano	Río Parti	Río Bayano	Pacific	Panamá	Panama	Pan	9.056	-78.6595	EB-99-15	8 April 1999	Eldredge Bermingham	N/A	P. gillii	Clade 5c	5b+c	Poecilia gillii (P. gillii, P. sp. "Patuca")			1	1	1	1	1	1	1				KP699997	KP700448	KP700546	KP700840	KP700758	KP700912	KP700623
6			11337 allele 2																					N/A	N/A	1	1	1	x	x
7	Poecilia gillii	Ingroup	118598	MLBM 118598	Río Salto at CR 6 between Upala and Bijagua	Río Salto	Río Tempisque	Pacific	Alajuela	Costa Rica	CR	10.7982	-85.0233	06-22	2006	Jerry Johnson Lab	whole fish in 95% ethanol	P. mexicana	Clade 8	8	P. mexicana			x	1	1	1	1	1	1				N/A	KP700461	KP700548	KP700844	KP700770	KP700923	KP700635
8			118598 allele 2																					N/A	N/A	1	1	1	x	x
9	Poecilia gillii	Ingroup	12345	STRI-NFC 12345	Río San Pedro at San Pedro	Río San Pedro	Río Cocle del Norte	Atlantic	Coclé	Panama	Pan	8.72681	-80.2194	DF-00-16	17 March 2000	Daniel W. Fromm	muscle plug in DMSO	P. gillii	Clade 5c	5b+c	Poecilia gillii (P. gillii, P. sp. "Patuca")			1	1	1	1	1	1	1				KP700004	KP700449	KP700547	KP700841	KP700759	KP700913	KP700624
10			12345 allele 2																					N/A	N/A	1	1	1	x	x
11	Poecilia gillii	Ingroup	167949	MLBM 167949	Trib. to Río Grande at La Trinidad	Lago Managua	Río San Juan	Atlantic	Estelí	Nicaragua	N	12.9713	-86.2372	N12-16	5 August 2012	Justin C. Bagley, Aaron Haskeltsie Smith	whole fish in 95% ethanol; smaller male with large gillii caudal fin spot and faded yellow spots(most likely; or could have been orange? Still recall yellow being most common in small males here?), yellow pelvic fins and belly; collected by JCB AHS (Aaron Haskeltskie Smith)	P. sphenops	Clade 2 - 2b	2b	P. sphenops			1	1	1	1	1	1	1				KP700208	KP700463	KP700550	KP700846	KP700772	KP700924	KP700637
12			167949 allele 2																					N/A	N/A	1	1	1	x	x
13	Poecilia gillii	Ingroup	172455	MLBM 172455	Lago Jiloa near Ken McKaye field station	Lago Jiloa	Lago Jiloa	Atlantic	Managua	Nicaragua	N	12.2186	-86.3119	N10-02	6 October 2010	Justin C. Bagley, Joseph T. Nelson	whole fish in 95% ethanol	P. mexicana	Clade 8b	8	P. mexicana			1	1	1	1	1	1	1				KP700316	KP700472	KP700554	KP700851	KP700779	KP700928	KP700644
14			172455 allele 2																					N/A	N/A	1	1	1	x	x
15	Poecilia gillii	Ingroup	172702	MLBM 172702	Río Tipitapa, river between Lago Managua and Lago Nicaragua	Lago Nicaragua	Río San Juan	Atlantic	Managua	Nicaragua	N	12.2027	-86.1021	N10-06	8 October 2010	Justin C. Bagley, Joseph T. Nelson	whole fish in 95% ethanol	P. sp. "Tipitapa"	Clade 1	1	P. sp. "Tipitapa"			1	1	1	1	1	1	1				KP700335	KP700477	KP700559	KP700856	KP700781	KP700929	KP700655
16			172702 allele 2																					N/A	N/A	1	1	1	x	x
17	Poecilia gillii	Ingroup	173337	MLBM 173337	Río Mayales main stem	Lago Nicaragua	Río San Juan	Atlantic	Chontales	Nicaragua	N	12.0668	-85.4038	N10-14	8 October 2010	Justin C. Bagley, Joseph T. Nelson	whole fish in 95% ethanol; plain fin (no red)	P. mexicana	clade 8m	8	P. mexicana			1	1	1	1	1	1	1				KP700356	KP700485	KP700566	KP700862	KP700783	KP700930	KP700665
18			173337 allele 2																					N/A	N/A	1	1	1	x	x
19	Poecilia gillii	Ingroup	173964	MLBM 173964	Unnamed trib. to Río Ojucuapa, trib. to Lago Nicaragua, in cow pasture just off rd ~5.5 km northeast of El Guasimo (further from the main rd than N10-24)	Lago Nicaragua	Río San Juan	Atlantic	Chontales	Nicaragua	N	11.8294	-85.2048	N10-23	10 October 2010	Jerald B. Johnson, Joseph T. Nelson	whole fish in 95% ethanol	P. mexicana	Clade 8m	8	P. mexicana			1	1	1	1	1	1	1				KP700378	KP700493	KP700573	KP700870	KP700786	KP700931	KP700676
20			173964 allele 2																					N/A	N/A	1	1	1	x	x
21	Poecilia gillii	Ingroup	4161	STRI-NFC 4161	Río Acla	Río Acla-Quebrada 2	Río Acla	Atlantic	San Blas	Panama	Pan	8.79578	-77.6733	EB-95-18	22 February 1995	Eldredge Bermingham	muscle plug in DMSO	"gillii" sp. 2	Clade 3 Acla	3	"gillii" sp. 2			1	1	1	1	1	1	1				KP699835	KP700427	KP700529	KP700824	KP700736	KP700893	KP700595
22			4161 allele 2																					N/A	N/A	1	1	1	x	x
23	Poecilia "sphenops" sp. in Alda et al. (2013)	Ingroup	7780	STRI-NFC 7780	Río Sinacapa, 9 km from Guanagasapa	Río Sinacapa	Río Maria Linda	Atlantic	Escuintla	Guatemala	Guat	14.2019	-90.7076	AP-98-6	22 March 1998	Anabel Perdices	N/A	P. catemaconis/sphenops	Clade 2 - 2a Catemaco	2a	P. catemaconis (catemaconis + "sphenops" sp. 1)			1	x	1	1	1	1	1				KP699870	N/A	JX968755	KP700827	KP700740	KP700896	KP700600
24			7780 allele 2																					N/A	N/A	1	1	1	x	x
25	Poecilia sp.	Ingroup	8181	STRI-NFC 8181	Río Amatillo at Lago Izabal near Venta de El Amatillo	Río Amatillo	Río Polochic	Atlantic	Izabal	Guatemala	Guat	15.5391	-88.8983	AP-98-28	1 April 1998	Anabel Perdices	N/A	P. mexicana	Clade 8c	8	P. mexicana			1	x	1	1	1	1	1				KP699892	N/A	KP700530	KP700828	KP700741	KP700897	KP700602
26			8181 allele 2																					N/A	N/A	1	1	1	x	x
27	Poecilia sp.	Ingroup	8290	STRI-NFC 8290	Río Chaguacal, trib. to Río Polochic	Río Chaguacal	Río Polochic	Atlantic	Alta Verapaz	Guatemala	Guat	15.3162	-89.8556	AP-98-32	2 April 1998	Anabel Perdices	N/A	P. mexicana	Clade 8c	8	P. mexicana			1	1	1	1	1	1	1				KP699905	KP700434	KP700534	KP700830	KP700744	KP700900	KP700606
28			8290 allele 2																					N/A	N/A	1	1	1	x	x
29	Poecilia hondurensis	Ingroup	8520	STRI-NFC 8520	Quebrada De Chicho between Comunidades de Achiote and Cholomena at A	Quebrada de Chico	Río Aguán	Atlantic	Colón	Honduras	Hon	15.5348	-86.2117	AP-98-43	12 April 1998	Anabel Perdices	N/A	P. hondurensis	Clade 4	4	P. hondurensis			1	x	1	1	1	1	1				KP699936	N/A	N/A	KP700833	KP700747	KP700903	KP700611
30			8520 allele 2																					N/A	N/A	1	1	1	x	x
31	Poecilia mexicana	Ingroup	8607	STRI-NFC 8607	Río Medina, trib. to Río Aguan, at Coyoles Centrales	Río Medina	Río Aguán	Atlantic	Yoro	Honduras	Hon	15.4838	-86.666	AP-98-45	13 April 1998	Anabel Perdices	N/A	P. mexicana	Clade 8c	8	P. mexicana			1	1	1	1	1	1	1				KP699942	KP700439	KP700539	KP700834	KP700749	KP700905	KP700613
32			8607 allele 2																					N/A	N/A	1	1	1	x	x
33	Poecilia sp.	Ingroup	8706	STRI-NFC 8706	Quebrada de Mercado at Río Guayambre, trib. to Río Patuca, near La Cruz	Quebrada de Mercado	Río Patuca	Atlantic	Olancho	Honduras	Hon	14.3563	-86.0652	AP-98-49	16 April 1998	Anabel Perdices	N/A	P. gilii	Clade 5b	5b+c	Poecilia gillii (P. gillii, P. sp. "Patuca")			1	x	1	1	1	1	1				KP699955	N/A	KP700539	KP700835	KP700750	KP700906	KP700614
34			8706 allele 2																					N/A	N/A	1	1	1	x	x
35	Poecilia mexicana	Ingroup	8747	STRI-NFC 8747	Río Tepemechin, trib. to Río Patuca, at Tepemechin	Río Tepemechin	Río Patuca	Atlantic	Olancho	Honduras	Hon	14.4018	-85.9301	AP-98-51	17 April 1998	Anabel Perdices	N/A	P. gilii	Clade 5b	5b+c	Poecilia gillii (P. gillii, P. sp. "Patuca")			1	1	1	1	1	1	1				KP699959	KP700441	KP700541	KP700837	KP700751	KP700908	KP700616
36			8747 allele 2																					N/A	N/A	1	1	1	x	x
37	Poecilia hondurensis - P. "spheops" sp. in Alda et al. (2013)	Ingroup	8859	STRI-NFC 8859	Río Goascorán at Caridad	Río Goascorán	Río Goascorán	Pacific	Valle	Honduras	Hon	13.8277	-87.6948	AP-98-55	18 April 1998	Anabel Perdices	N/A	P. sphenops	Clade 2 - 2b	2b	P. sphenops			1	1	1	1	1	1	1				KP699970	KP700445	KP700545	KP700839	KP700755	KP700909	KP700620
38			8859 allele 2																					N/A	N/A	1	1	1	x	x
39	Poecilia gillii	Ingroup	938	STRI-NFC 938	Río Bayano-B	Río Bayano	Río Bayano	Pacific	Panamá	Panama	Pan	9.177	-78.7457	EB-93-34	20 November 1993	Eldredge Bermingham	muscle plug in DMSO	P. gilii	Clade 5c	5b+c	Poecilia gillii (P. gillii, P. sp. "Patuca")			1	1	1	1	1	1	1				KP699793	KP700417	KP700525	KP700820	KP700729	KP700887	KP700585
40			938 allele 2																					N/A	N/A	1	1	1	x	x
41	Poecilia gillii	Ingroup	PGB701.02	Lee & Johnson (2009)	Trib. to Río Reventazon at Rd. 232 across from Angostura Lagoon	Río Reventazon	Río Reventazon	Atlantic	Cartago	Costa Rica	CR	9.8723	-83.6332	07-01	2007	Jared B. Lee, Jerald B. Johnson	whole fish in 95% ethanol	P. gillii	Clade 8j	8	Poecilia mexicana			1	1	1	1	1	1	1				FJ446208	KP700515	KP700583	KP700881	KP700803	KP700947	KP700703
42			PGB701.02 allele 2																					N/A	N/A	1	1	1	x	x
43	Poecilia salvatoris	Ingroup	Psalv	N/A	N/A	N/A	N/A	N/A	N/A	Honduras	Hon	N/A	N/A	N/A	N/A	Michael Tobler	whole fish in 95% ethanol	P. salvatoris	Clade 8c	8	Poecilia salvatoris			x	1	x	x	1	x	x				N/A	KP700522	N/A	N/A	KP700811	KP700953	N/A
44			Psalv allele 2																					N/A	N/A	x	x	1	x	x
45	Poecilia butleri	Ingroup	Pbut	Zuñiga-Vega et al. (2014)	N/A	N/A	N/A	Atlantic	N/A	Mexico	Mex	N/A	N/A	N/A	Zuñiga-Vega et al. (2014)	Zuñiga-Vega et al. (2014)	N/A	Poecilia butleri	Clade 6	6	Poecilia butleri			1	x	1	x	1	x	x				JN368093	N/A	N/A	N/A	N/A	N/A	N/A
46			Pbut allele 2																					N/A	N/A	x	x	x	x	x
47	Poecilia catemaconis	Ingroup	Pcatemac	N/A	N/A	N/A	N/A	N/A	N/A	N/A	N/A	N/A	N/A	N/A	N/A	N/A	N/A	P. catemaconis/sphenops	Clade 2 - 2a Catemaco	2a	P. catemaconis (catemaconis + "sphenops" sp. 1)			1	x	1	x	x	x	x				N/A	N/A	N/A	N/A	N/A	N/A	N/A
48			Pcatemac allele 2																					N/A	N/A	x	x	x	x	x
49	Poecilia sulphuraria	Ingroup	PslLaGl30	N/A	N/A	N/A	N/A	N/A	N/A	N/A	N/A	N/A	N/A	N/A	N/A	N/A	N/A	Poecilia sulphuraria	Clade 7a	7	uncertain (P. sulphuraria, P. thermalis, P. m. limantouri)			x	1	x	x	x	x	x				N/A	N/A	N/A	N/A	N/A	N/A	N/A
50	Poecilia mexicana limantouri	Ingroup	Pmlim10	N/A	N/A	N/A	N/A	N/A	N/A	N/A	N/A	N/A	N/A	N/A	N/A	N/A	N/A	Poecilia mexicana limantouri	Clade 7b	7	uncertain (P. sulphuraria, P. thermalis, P. m. limantouri)			x	1	x	x	x	x	x				N/A	N/A	N/A	N/A	N/A	N/A	N/A
																								N/A	N/A	x	x	x	x	x
																								20	20	44	42	45	20	21
Ingroup sampling overview
	Taxon / lineage	CLADE	bGMYC groups	bGMYC-based taxonomy	Species	No. individuals per 'species'	No. alleles per 'species' (including dummy sequences)
	P. sp. "Tipitapa"	Clade 1	1	P. sp. "Tipitapa"	P. sp. "Tipitapa"	1	2
	P. catemaconis/sphenops	Clade 2 - 2a Catemaco	2a	P. catemaconis (catemaconis + "sphenops" sp. 1)	P. catemaconis (catemaconis + "sphenops" sp. 1)	2	4
	P. sphenops	Clade 2 - 2b	2b	P. sphenops	P. sphenops	2	4
	"gillii" sp. 2	Clade 3 Acla	3	"gillii" sp. 2	"gillii" sp. 2	1	2
	P. hondurensis	Clade 4	4	P. hondurensis	P. hondurensis	1	2
	P. gilii	Clade 5b	5b+c	Poecilia gillii (P. gillii, P. sp. "Patuca")	P. gilii	5	10
	P. gilii	Clade 5c	5b+c	Poecilia gillii (P. gillii, P. sp. "Patuca")	–	–	–
	P. gillii	Clade 5c	5b+c	Poecilia gillii (P. gillii, P. sp. "Patuca")	–	–	–
	Poecilia butleri	Clade 6	6	Poecilia butleri	Poecilia butleri	1	2
	Poecilia sulphuraria	Clade 7a	7	uncertain (P. sulphuraria, P. thermalis, P. m. limantouri)	limantouri clade	2	2
	Poecilia mexicana limantouri	Clade 7b	7	uncertain (P. sulphuraria, P. thermalis, P. m. limantouri)	–	–	–
	P. mexicana	Clade 8	8	P. mexicana	P. mexicana	11	22
	P. mexicana	Clade 8b	8	P. mexicana	–	–	–
	P. mexicana	Clade 8c	8	P. mexicana	–	–	–
	P. salvatoris	Clade 8c	8	P. mexicana	–	–	–
	P. gillii	Clade 8j	8	P. mexicana	–	–	–
	P. mexicana	clade 8m	8	P. mexicana	–	–	–
					Totals	26	50

## Sheet: concatenated mtDNA + nDNA set
Concatenated mtDNA + nDNA dataset (n = 80)																					mtDNA		nDNA	Legend: 1=sequence; x=absent							mtDNA		nDNA	Legend: N/A, not available
	Species_ID	Ingroup / Outgroup	ID	Voucher No. / Reference	Locality	Drainage 1	Drainage 2	Slope	Province / Department	Country	Country code	Latitude	Longitude	Collection ID	Taxon / lineage	CLADE	bGMYC groups	bGMYC-based taxonomy		Total sampling per gene:	Cytb	cox1	RPS7	Ldh-A	X-src	X-yes	Glyt		GenBank Numbers:		Cytb	cox1	RPS7	Ldh-A	X-src	X-yes	Glyt
1	Poecilia orri	Ingroup	08.2060	LSU backlog/WAM08-109	Island of Roatan, Bay Islands, off northern coast of Honduras	Roatan	Atlantic Ocean	Atlantic	Islas de la Bahía	Honduras	Hon	N/A	N/A	WAM08-109	P. mexicana	Clade 8c	8	P. mexicana			x	1	1	1	1	1	1				N/A	KP700414	KP700523	KP700817	KP700726	KP700885	KP700713
2			08.2060 allele 2																		N/A	N/A	1	1	1	x	x
3	Poecilia orri	Ingroup	08.2066	LSU backlog/WAM08-109	Island of Roatan, Bay Islands, off northern coast of Honduras	Roatan	Atlantic Ocean	Atlantic	Islas de la Bahía	Honduras	Hon	N/A	N/A	WAM08-109	P. mexicana	Clade 8c	8	P. mexicana			x	1	1	1	1	x	1				N/A	KP700416	KP700524	KP700819	KP700728	N/A	KP700714
4			08.2066 allele 2																		N/A	N/A	1	1	1	x	x
5	Poecilia gillii	Ingroup	11337	STRI-NFC 11337	Río Parti just south of CA 1, approximately 7 km E of Lago Bayano	Río Parti	Río Bayano	Pacific	Panamá	Panama	Pan	9.056	-78.6595	EB-99-15	P. gillii	Clade 5c	5b+c	Poecilia gillii (P. gillii, P. sp. "Patuca")			1	1	1	1	1	1	1				KP699997	KP700448	KP700546	KP700840	KP700758	KP700912	KP700623
6			11337 allele 2																		N/A	N/A	1	1	1	x	x
7	Poecilia gillii	Ingroup	118598	MLBM 118598	Río Salto at CR 6 between Upala and Bijagua	Río Salto	Río Tempisque	Pacific	Alajuela	Costa Rica	CR	10.7982	-85.0233	06-22	P. mexicana	Clade 8	8	P. mexicana			x	1	1	1	1	1	1				N/A	KP700461	KP700548	KP700844	KP700770	KP700923	KP700635
8			118598 allele 2																		N/A	N/A	1	1	1	x	x
9	Poecilia gillii	Ingroup	12345	STRI-NFC 12345	Río San Pedro at San Pedro	Río San Pedro	Río Cocle del Norte	Atlantic	Coclé	Panama	Pan	8.72681	-80.2194	DF-00-16	P. gillii	Clade 5c	5b+c	Poecilia gillii (P. gillii, P. sp. "Patuca")			1	1	1	1	1	1	1				KP700004	KP700449	KP700547	KP700841	KP700759	KP700913	KP700624
10			12345 allele 2																		N/A	N/A	1	1	1	x	x
11	Poecilia gillii	Ingroup	167949	MLBM 167949	Trib. to Río Grande at La Trinidad	Lago Managua	Río San Juan	Atlantic	Estelí	Nicaragua	N	12.9713	-86.2372	N12-16	P. sphenops	Clade 2 - 2b	2b	P. sphenops			1	1	1	1	1	1	1				KP700208	KP700463	KP700550	KP700846	KP700772	KP700924	KP700637
12			167949 allele 2																		N/A	N/A	1	1	1	x	x
13	Poecilia gillii	Ingroup	172455	MLBM 172455	Lago Jiloa near Ken McKaye field station	Lago Jiloa	Lago Jiloa	Atlantic	Managua	Nicaragua	N	12.2186	-86.3119	N10-02	P. mexicana	Clade 8b	8	P. mexicana			1	1	1	1	1	1	1				KP700316	KP700472	KP700554	KP700851	KP700779	KP700928	KP700644
14			172455 allele 2																		N/A	N/A	1	1	1	x	x
15	Poecilia gillii	Ingroup	172702	MLBM 172702	Río Tipitapa, river between Lago Managua and Lago Nicaragua	Lago Nicaragua	Río San Juan	Atlantic	Managua	Nicaragua	N	12.2027	-86.1021	N10-06	P. sp. "Tipitapa"	Clade 1	1	P. sp. "Tipitapa"			1	1	1	1	1	1	1				KP700335	KP700477	KP700559	KP700856	KP700781	KP700929	KP700655
16			172702 allele 2																		N/A	N/A	1	1	1	x	x
17	Poecilia gillii	Ingroup	173337	MLBM 173337	Río Mayales main stem	Lago Nicaragua	Río San Juan	Atlantic	Chontales	Nicaragua	N	12.0668	-85.4038	N10-14	P. mexicana	clade 8m	8	P. mexicana			1	1	1	1	1	1	1				KP700356	KP700485	KP700566	KP700862	KP700783	KP700930	KP700665
18			173337 allele 2																		N/A	N/A	1	1	1	x	x
19	Poecilia gillii	Ingroup	173964	MLBM 173964	Unnamed trib. to Río Ojucuapa, trib. to Lago Nicaragua, in cow pasture just off rd ~5.5 km northeast of El Guasimo (further from the main rd than N10-24)	Lago Nicaragua	Río San Juan	Atlantic	Chontales	Nicaragua	N	11.8294	-85.2048	N10-23	P. mexicana	Clade 8m	8	P. mexicana			1	1	1	1	1	1	1				KP700378	KP700493	KP700573	KP700870	KP700786	KP700931	KP700676
20			173964 allele 2																		N/A	N/A	1	1	1	x	x
21	Poecilia gillii	Ingroup	4161	STRI-NFC 4161	Río Acla	Río Acla-Quebrada 2	Río Acla	Atlantic	San Blas	Panama	Pan	8.79578	-77.6733	EB-95-18	"gillii" sp. 2	Clade 3 Acla	3	"gillii" sp. 2			1	1	1	1	1	1	1				KP699835	KP700427	KP700529	KP700824	KP700736	KP700893	KP700595
22			4161 allele 2																		N/A	N/A	1	1	1	x	x
23	Poecilia "sphenops" sp. in Alda et al. (2013)	Ingroup	7780	STRI-NFC 7780	Río Sinacapa, 9 km from Guanagasapa	Río Sinacapa	Río Maria Linda	Atlantic	Escuintla	Guatemala	Guat	14.2019	-90.7076	AP-98-6	P. catemaconis/sphenops	Clade 2 - 2a Catemaco	2a	P. catemaconis (catemaconis + "sphenops" sp. 1)			1	x	1	1	1	1	1				KP699870	N/A	JX968755	KP700827	KP700740	KP700896	KP700600
24			7780 allele 2																		N/A	N/A	1	1	1	x	x
25	Poecilia sp.	Ingroup	8181	STRI-NFC 8181	Río Amatillo at Lago Izabal near Venta de El Amatillo	Río Amatillo	Río Polochic	Atlantic	Izabal	Guatemala	Guat	15.5391	-88.8983	AP-98-28	P. mexicana	Clade 8c	8	P. mexicana			1	x	1	1	1	1	1				KP699892	N/A	KP700530	KP700828	KP700741	KP700897	KP700602
26			8181 allele 2																		N/A	N/A	1	1	1	x	x
27	Poecilia sp.	Ingroup	8290	STRI-NFC 8290	Río Chaguacal, trib. to Río Polochic	Río Chaguacal	Río Polochic	Atlantic	Alta Verapaz	Guatemala	Guat	15.3162	-89.8556	AP-98-32	P. mexicana	Clade 8c	8	P. mexicana			1	1	1	1	1	1	1				KP699905	KP700434	KP700534	KP700830	KP700744	KP700900	KP700606
28			8290 allele 2																		N/A	N/A	1	1	1	x	x
29	Poecilia hondurensis	Ingroup	8520	STRI-NFC 8520	Quebrada De Chicho between Comunidades de Achiote and Cholomena at A	Quebrada de Chico	Río Aguán	Atlantic	Colón	Honduras	Hon	15.5348	-86.2117	AP-98-43	P. hondurensis	Clade 4	4	P. hondurensis			1	x	1	1	1	1	1				KP699936	N/A	N/A	KP700833	KP700747	KP700903	KP700611
30			8520 allele 2																		N/A	N/A	1	1	1	x	x
31	Poecilia mexicana	Ingroup	8607	STRI-NFC 8607	Río Medina, trib. to Río Aguan, at Coyoles Centrales	Río Medina	Río Aguán	Atlantic	Yoro	Honduras	Hon	15.4838	-86.666	AP-98-45	P. mexicana	Clade 8c	8	P. mexicana			1	1	1	1	1	1	1				KP699942	KP700439	KP700539	KP700834	KP700749	KP700905	KP700613
32			8607 allele 2																		N/A	N/A	1	1	1	x	x
33	Poecilia sp.	Ingroup	8706	STRI-NFC 8706	Quebrada de Mercado at Río Guayambre, trib. to Río Patuca, near La Cruz	Quebrada de Mercado	Río Patuca	Atlantic	Olancho	Honduras	Hon	14.3563	-86.0652	AP-98-49	P. gilii	Clade 5b	5b+c	Poecilia gillii (P. gillii, P. sp. "Patuca")			1	x	1	1	1	1	1				KP699955	N/A	KP700539	KP700835	KP700750	KP700906	KP700614
34			8706 allele 2																		N/A	N/A	1	1	1	x	x
35	Poecilia mexicana	Ingroup	8747	STRI-NFC 8747	Río Tepemechin, trib. to Río Patuca, at Tepemechin	Río Tepemechin	Río Patuca	Atlantic	Olancho	Honduras	Hon	14.4018	-85.9301	AP-98-51	P. gilii	Clade 5b	5b+c	Poecilia gillii (P. gillii, P. sp. "Patuca")			1	1	1	1	1	1	1				KP699959	KP700441	KP700541	KP700837	KP700751	KP700908	KP700616
36			8747 allele 2																		N/A	N/A	1	1	1	x	x
37	Poecilia hondurensis - P. "spheops" sp. in Alda et al. (2013)	Ingroup	8859	STRI-NFC 8859	Río Goascorán at Caridad	Río Goascorán	Río Goascorán	Pacific	Valle	Honduras	Hon	13.8277	-87.6948	AP-98-55	P. sphenops	Clade 2 - 2b	2b	P. sphenops			1	1	1	1	1	1	1				KP699970	KP700445	KP700545	KP700839	KP700755	KP700909	KP700620
38			8859 allele 2																		N/A	N/A	1	1	1	x	x
39	Poecilia gillii	Ingroup	938	STRI-NFC 938	Río Bayano-B	Río Bayano	Río Bayano	Pacific	Panamá	Panama	Pan	9.177	-78.7457	EB-93-34	P. gilii	Clade 5c	5b+c	Poecilia gillii (P. gillii, P. sp. "Patuca")			1	1	1	1	1	1	1				KP699793	KP700417	KP700525	KP700820	KP700729	KP700887	KP700585
40			938 allele 2																		N/A	N/A	1	1	1	x	x
41	Poecilia gillii	Ingroup	PGB701.02	Lee & Johnson (2009)	Trib. to Río Reventazon at Rd. 232 across from Angostura Lagoon	Río Reventazon	Río Reventazon	Atlantic	Cartago	Costa Rica	CR	9.8723	-83.6332	07-01	P. gillii	Clade 8j	8	Poecilia mexicana			1	1	1	1	1	1	1				FJ446208	KP700515	KP700583	KP700881	KP700803	KP700947	KP700703
42			PGB701.02 allele 2																		N/A	N/A	1	1	1	x	x
43	Poecilia salvatoris	Ingroup	Psalv	N/A	N/A	N/A	N/A	N/A	N/A	Honduras	Hon	N/A	N/A	N/A	P. salvatoris	Clade 8c	8	Poecilia salvatoris			x	1	x	x	1	x	x				N/A	KP700522	N/A	N/A	KP700811	KP700953	N/A
44			Psalv allele 2																		N/A	N/A	x	x	1	x	x
45	Poecilia butleri	Ingroup	Pbut	Zuñiga-Vega et al. (2014)	N/A	N/A	N/A	Atlantic	N/A	Mexico	Mex	N/A	N/A	N/A	Poecilia butleri	Clade 6	6	Poecilia butleri			1	x	1	x	1	x	x				JN368093	N/A	N/A	N/A	N/A	N/A	N/A
46			Pbut allele 2																		N/A	N/A	x	x	x	x	x
47	Poecilia catemaconis	Ingroup	Pcatemac	N/A	N/A	N/A	N/A	Atlantic	N/A	Mexico	Mex	N/A	N/A	N/A	P. catemaconis/sphenops	Clade 2 - 2a Catemaco	2a	P. catemaconis (catemaconis + "sphenops" sp. 1)			1	x	1	x	x	x	x				KP700405	N/A	N/A	N/A	N/A	N/A	N/A
48			Pcatemac allele 2																		N/A	N/A	x	x	x	x	x
49	Poecilia sulphuraria	Ingroup	PslLaGl30	N/A	N/A	N/A	N/A	Atlantic	N/A	Mexico	Mex	N/A	N/A	N/A	Poecilia sulphuraria	Clade 7a	7	uncertain (P. sulphuraria, P. thermalis, P. m. limantouri)			x	1	x	x	x	x	x				KF276628	N/A	N/A	N/A	N/A	N/A	N/A
50	Poecilia mexicana limantouri	Ingroup	Pmlim10	N/A	N/A	N/A	N/A	Atlantic	N/A	Mexico	Mex	N/A	N/A	N/A	Poecilia mexicana limantouri	Clade 7b	7	uncertain (P. sulphuraria, P. thermalis, P. m. limantouri)			x	1	x	x	x	x	x				HQ677873	N/A	N/A	N/A	N/A	N/A	N/A
51	Limia perugiae	Outgroup22	Lperu	N/A	N/A	N/A	N/A	Atlantic	N/A	Dominican Republic	DR	N/A	N/A	N/A							x	x	1	x	1	1	1				Bagley et al. (in prep.)	N/A	KP700577	N/A	KP700787	KP700932	KP700687
52			Lperu allele 2																		N/A	N/A	1	x	1	x	x
53	Poecilia latipinna	Outgroup5	Platip	N/A	N/A	N/A	N/A	Atlantic	N/A	Mexico	Mex	N/A	N/A	N/A	sail-fin mollies	Outgroup	–	–			1	1	1	1	1	1	1				EF017539	KP700518	Bagley et al. (in prep.)	KP700882	KP700806	KP700950	KP700706
54			Platip allele 2																		N/A	N/A	1	1	1	x	x
55	Poecilia latipunctata	Outgroup6	Platipun	N/A	N/A	N/A	N/A	Atlantic	N/A	Mexico	Mex	N/A	N/A	N/A	sail-fin mollies	Outgroup	–	–			1	1	1	x	1	1	1				KP700411	KP700519	KP700584	N/A	KP700807	KP700951	KP700707
56			Platipun allele 2																		N/A	N/A	1	x	1	x	x
57	Micropoecilia picta	Outgroup7	Ppict	N/A	N/A	N/A	N/A	Atlantic	N/A	Trinidad	Trin	N/A	N/A	N/A	M. picta	Outgroup	–	–			1	1	x	x	1	x	1				KP700412	KP700520	N/A	N/A	KP700809	N/A	KP700709
58			Ppict allele 2																		N/A	N/A	x	x	1	x	x
59	Poecilia reticulata	Outgroup8	Pret	N/A	N/A	N/A	N/A	Atlantic	N/A	Trinidad	Trin	N/A	N/A	N/A	P. reticulata	Outgroup	–	–			1	1	x	x	1	1	1				KP700413	KP700521	N/A	N/A	KP700810	KP700955	KP700710
60			Pret allele 2																		N/A	N/A	x	x	1	x	x
61	Poecilia caucana	Outgroup1	Pcauc	N/A	N/A	N/A	N/A	Atlantic	N/A	Trinidad	Trin	N/A	N/A	N/A	P. caucana	Outgroup	–	–			x	x	x	x	x	x	x				KP700406	N/A	N/A	N/A	N/A	N/A	N/A
62			Pcauc allele 2																		N/A	N/A	x	x	x	x	x
63	Xiphophorus helleri	Outgroup13	Xhell	Hrbek et al. (2007)	N/A	N/A	N/A	N/A	N/A	Mexico	Mex	N/A	N/A	N/A	X. helleri	Outgroup	–	–			x	x	x	x	x	x	x				EF017548	N/A	N/A	N/A	N/A	N/A	N/A
64			Xhell allele 2																		N/A	N/A	x	x	x	x	x
65	Xiphophorus maculatus	Outgroup14	Xmac	Hrbek et al. (2007)	N/A	N/A	N/A	N/A	N/A	Mexico	Mex	N/A	N/A	N/A	X. maculatus	Outgroup	–	–			x	x	x	x	x	x	x				EF017551	N/A	N/A	N/A	N/A	N/A	N/A
66			Xmac allele 2																		N/A	N/A	x	x	x	x	x
67	Belonesox belizanus	Outgroup15	Bbeliz	Hrbek et al. (2007)	N/A	N/A	N/A	N/A	N/A	N/A	N/A	N/A	N/A	N/A	B. belizanus	Outgroup	–	–			x	x	x	x	x	x	x				EF017519	N/A	N/A	N/A	N/A	N/A	N/A
68			Bbeliz allele 2																		N/A	N/A	x	x	x	x	x
69	Limia dominicensis	Outgroup16	Ldom	Hrbek et al. (2007)	N/A	N/A	N/A	Atlantic	N/A	Haiti/Dominican Republic	Ha/DR	N/A	N/A	N/A	L. dominicensis	Outgroup	–	–			x	x	x	x	x	x	x				EF017533	N/A	N/A	N/A	N/A	N/A	N/A
70			Ldom allele 2																		N/A	N/A	x	x	x	x	x
71	Limia melanogaster	Outgroup17	Lmela	Hrbek et al. (2007)	N/A	N/A	N/A	Atlantic	N/A	Haiti/Jamaica	Ha/Jam	N/A	N/A	N/A	L. melanogaster	Outgroup	–	–			x	x	x	x	x	x	x				EF017534	N/A	N/A	N/A	N/A	N/A	N/A
72			Lmela allele 2																		N/A	N/A	x	x	x	x	x
73	Limia tridens	Outgroup18	Ltrid	Hrbek et al. (2007)	N/A	N/A	N/A	Atlantic	N/A	Haiti/Dominican Republic	Ha/DR	N/A	N/A	N/A	L. tridens	Outgroup	–	–			x	x	x	x	x	x	x				EF017535	N/A	N/A	N/A	N/A	N/A	N/A
74			Ltrid allele 2																		N/A	N/A	x	x	x	x	x
75	Limia vittata	Outgroup19	LvitCU153	Doadrio et al. (2009)	N/A	N/A	N/A	Atlantic	N/A	Cuba	Cub	N/A	N/A	N/A	L. vittata	Outgroup	–	–			x	x	x	x	x	x	x				FJ178765	N/A	N/A	N/A	N/A	N/A	N/A
76			LvitCU153 allele 2																		N/A	N/A	x	x	x	x	x
77	Limia melanonotata	Outgroup21	Lmelanon	Doadrio et al. (2009); Alda et al. (2013)	N/A	N/A	N/A	Atlantic	N/A	Venezuela	Ven	N/A	N/A	N/A	L. heterandria	Outgroup	–	–			x	x	x	x	x	x	x				HQ857426	N/A	N/A	N/A	N/A	N/A	N/A
78			Lmelanon allele 2																		N/A	N/A	x	x	x	x	x
79	Limia heterandria	Outgroup21	Lheteran	Meredith et al. (2011)	N/A	N/A	N/A	Atlantic	N/A	Venezuela	Ven	N/A	N/A	N/A	L. heterandria	Outgroup	–	–			x	x	x	x	x	x	x				HQ857426	N/A	N/A	N/A	N/A	N/A	N/A
80			Lheteran allele 2																		N/A	N/A
																					24	24	50	44	55	24	26
Ingroup sampling overview
	Taxon / lineage	CLADE	bGMYC groups	bGMYC-based taxonomy	Species	No. individuals per 'species'	No. alleles per 'species' (including dummy sequences)
	P. sp. "Tipitapa"	Clade 1	1	P. sp. "Tipitapa"	P. sp. "Tipitapa"	1	2
	P. catemaconis/sphenops	Clade 2 - 2a Catemaco	2a	P. catemaconis (catemaconis + "sphenops" sp. 1)	P. catemaconis (catemaconis + "sphenops" sp. 1)	2	4
	P. sphenops	Clade 2 - 2b	2b	P. sphenops	P. sphenops	2	4
	"gillii" sp. 2	Clade 3 Acla	3	"gillii" sp. 2	"gillii" sp. 2	1	2
	P. hondurensis	Clade 4	4	P. hondurensis	P. hondurensis	1	2
	P. gilii	Clade 5b	5b+c	Poecilia gillii (P. gillii, P. sp. "Patuca")	P. gilii	5	10
	P. gilii	Clade 5c	5b+c	Poecilia gillii (P. gillii, P. sp. "Patuca")	–	–	–
	P. gillii	Clade 5c	5b+c	Poecilia gillii (P. gillii, P. sp. "Patuca")	–	–	–
	Poecilia butleri	Clade 6	6	Poecilia butleri	Poecilia butleri	1	2
	Poecilia sulphuraria	Clade 7a	7	uncertain (P. sulphuraria, P. thermalis, P. m. limantouri)	limantouri clade	2	2
	Poecilia mexicana limantouri	Clade 7b	7	uncertain (P. sulphuraria, P. thermalis, P. m. limantouri)	–	–	–
	P. mexicana	Clade 8	8	P. mexicana	P. mexicana	11	22
	P. mexicana	Clade 8b	8	P. mexicana	–	–	–
	P. mexicana	Clade 8c	8	P. mexicana	–	–	–
	P. salvatoris	Clade 8c	8	P. mexicana	–	–	–
	P. gillii	Clade 8j	8	P. mexicana	–	–	–
	P. mexicana	clade 8m	8	P. mexicana	–	–	–
					Totals	26	50

## Sheet: Refs. and Notes
References
Bagley JC, Alda F, Bermingham E, Johnson JB (in prep.) Phylogeography of the Poecilia mexicana complex: implications for evolutionary history in the Central American freshwater fish assemblage. Journal of Biogeography.
Doadrio I, Perea S, Alcaraz L, Hernandez N (2009) Molecular phylogeny and biogeography of the Cuban genus Girardinus Poey, 1854 and relationships within the tribe Girardinini (Actinopterygii, Poeciliidae). Molecular Phylogenetics and Evolution 50:16-30.
Hrbek T, Seckinger J, Meyer A (2007) A phylogenetic and biogeographic perspective on the evolution of poeciliid fishes. Molecular Phylogenetics and Evolution 43:986-998.
Lee JB, Johnson JB (2009) Biogeography of the livebearing fish Poecilia gillii in Costa Rica: are phylogeographical breaks congruent with fish community boundaries? Molecular Ecology 18:4088-4101.
Meredith RW, Pires MN, Reznick DN, Springer MS (2011) Molecular phylogenetic relationships and the coevolution of placentotrophy and superfetation in Poecilia (Poeciliidae: Cypriniformes). Molecular Phylogenetics and Evolution 59:148-157.
Palacios M, Arias-Rodriguez L, Plath M, Eifert C, Lerp H, Lamboj A, Voelker G, Tobler M (2013) The rediscovery of a long described species reveals additional complexity in speciation patterns of poeciliid fishes in sulfide springs. PLoS One 8:e71069. doi:10.1371/journal.pone.0071069.
Tobler M, Palacios M, Chapman LJ, Mitrofanov I, Bierbach D, Plath M, Arias-Rodriguez L, Garcia de Leon FJ, Mateos M (2011) Evolution in extreme environments: replicated phenotypic differentiation in livebearing fish inhabiting sulfidic springs. Evolution 65:2213-2228.
Zuñiga-Vega JJ, Ingley SJ, Unmack PJ, Johnson JB (2014) Do freshwater ecoregions and continental shelf width predict patterns of historical gene flow in the freshwater fish Poecilia butleri? Biological Journal of the Linnean Society 112:399-416.
Notes
Locality information including Lat-Long coordinates are from this study unless otherwise noted in the "Voucher no. / Reference " column.
